# Supplementary material for: Effects of phosphine ligands in nickel-catalyzed decarbonylation reactions of lactone
Source: Royal Society of Chemistry journal article supplement (doi:10.1039/d3ob01216f), 2023-01-01
Supplement: d3ob01216f1.pdf [file d3ob01216f1.pdf]

# Supporting Information

## Effects of Phosphine Ligands in Nickel-Catalyzed Decarbonylation Reactions of Lactone

Xinghua Wang<sup>2</sup>, Peng Jin<sup>1,3,4</sup>, Shiqiang Li<sup>3</sup>, Yiqiang Wen<sup>2</sup>, Fuke Wang<sup>4</sup>, Huijuan Wei<sup>2,\*</sup>,  
Donghui Wei<sup>2,\*</sup>

1. State Key Laboratory of Coking Coal Resources Green Exploitation, China Pingmei Shenma Group, Pingdingshan 467000, China
2. College of Chemistry, Zhengzhou University, Zhengzhou 450001, China
3. Henan Shenma Catalytic Technology Co., LTD., Pingdingshan 467000, China
4. Institute of Materials Research and Engineering (IMRE), Agency for Science, Technology and Research (A\*STAR), 2 Fusionopolis Way, Innovis #08-03, Singapore 138634, Republic of Singapore

\*e-mail: weihuijuan@zzu.edu.cn, donghuiwei@zzu.edu.cn

# Table of Contents

|                                                                                                       |          |
|-------------------------------------------------------------------------------------------------------|----------|
| <b>Part 1: Possible Pathways for Oxidative Addition of Intermediate 12(L1) to the Substrate .....</b> | <b>1</b> |
| <b>Part 2: Test of the Computational Methods .....</b>                                                | <b>2</b> |
| <b>Part 3: Comparing Triplet and Singlet States of Different Species.....</b>                         | <b>3</b> |
| <b>Part 4: IRC Results for Key Transition States .....</b>                                            | <b>4</b> |
| <b>Part 5: References .....</b>                                                                       | <b>6</b> |
| <b>Part 6: The Energetic Information of Optimized Structures .....</b>                                | <b>7</b> |
| <b>Part 7: Geometrical Coordinates of the Stationary Points.....</b>                                  | <b>9</b> |

## Part 1: Possible Pathways for Oxidative Addition of Intermediate 12(L1) to the Substrate

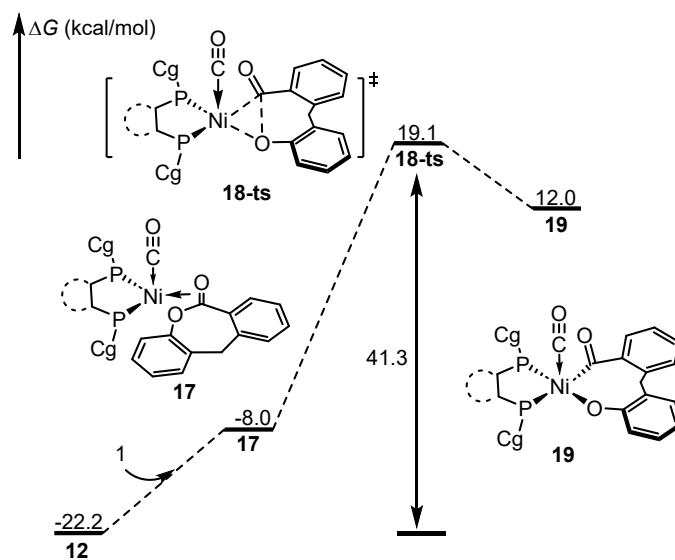

**Figure S1.** Gibbs free energy profiles of direct oxidative addition of intermediate 12(L1) to the substrate.

## Part 2: Test of the Computational Methods

We have compared the relative Gibbs free energies of **4(L1)**, **5-ts(L1)** and **6(L1)** at different levels including:

M06-L/def2-TZVPP/SMD<sub>toluene</sub> (L1)

M06-L/def2-TZVPP/IEF-PCM<sub>toluene</sub> (L2)<sup>1</sup>

M06/def2-TZVPP/SMD<sub>toluene</sub> (L3)<sup>2</sup>

$\omega$ B97X-D/def2-TZVPP/SMD<sub>toluene</sub> (L4)<sup>3</sup>

B3LYP-D3/def2-TZVPP/SMD<sub>toluene</sub> (L5)<sup>4</sup>

As shown in Table S1, there are the same trend and small energy barrier differences at different levels, indicating the selected method should be proper and reliable in this kind of reaction system.

**Table S1.** Comparison of the relative Gibbs free energies of **4(L1)**, **5-ts(L1)** and **6(L1)** calculated by using different levels (L1-5) (unit: kcal/mol).

| Level | <b>4(L1)</b> | <b>5-ts(L1)</b> | <b>6(L1)</b> |
|-------|--------------|-----------------|--------------|
| L1    | 0.0          | 14.0            | 10.3         |
| L2    | 0.0          | 13.5            | 9.9          |
| L3    | 0.0          | 15.2            | 11.8         |
| L4    | 0.0          | 15.8            | 12.0         |
| L5    | 0.0          | 17.1            | 12.2         |

### Part 3: Comparing Triplet and Singlet States of Different Species

**Table S2.** Free energy difference between triplet and singlet states of different species (unit: kcal/mol)

| SP                                  | Ni(COD) <sub>2</sub> | 2(L1) | 4(L1) | 6(L1) | 10(L1) | 12(L1) |
|-------------------------------------|----------------------|-------|-------|-------|--------|--------|
| $\Delta G(^3\text{SP}-^1\text{SP})$ | 30.6                 | 20.7  | 13.0  | 13.7  | 11.5   | 29.1   |

## Part 4: IRC Results for Key Transition States

**Table S3.** Intrinsic reaction coordinate (IRC) results for key transition states

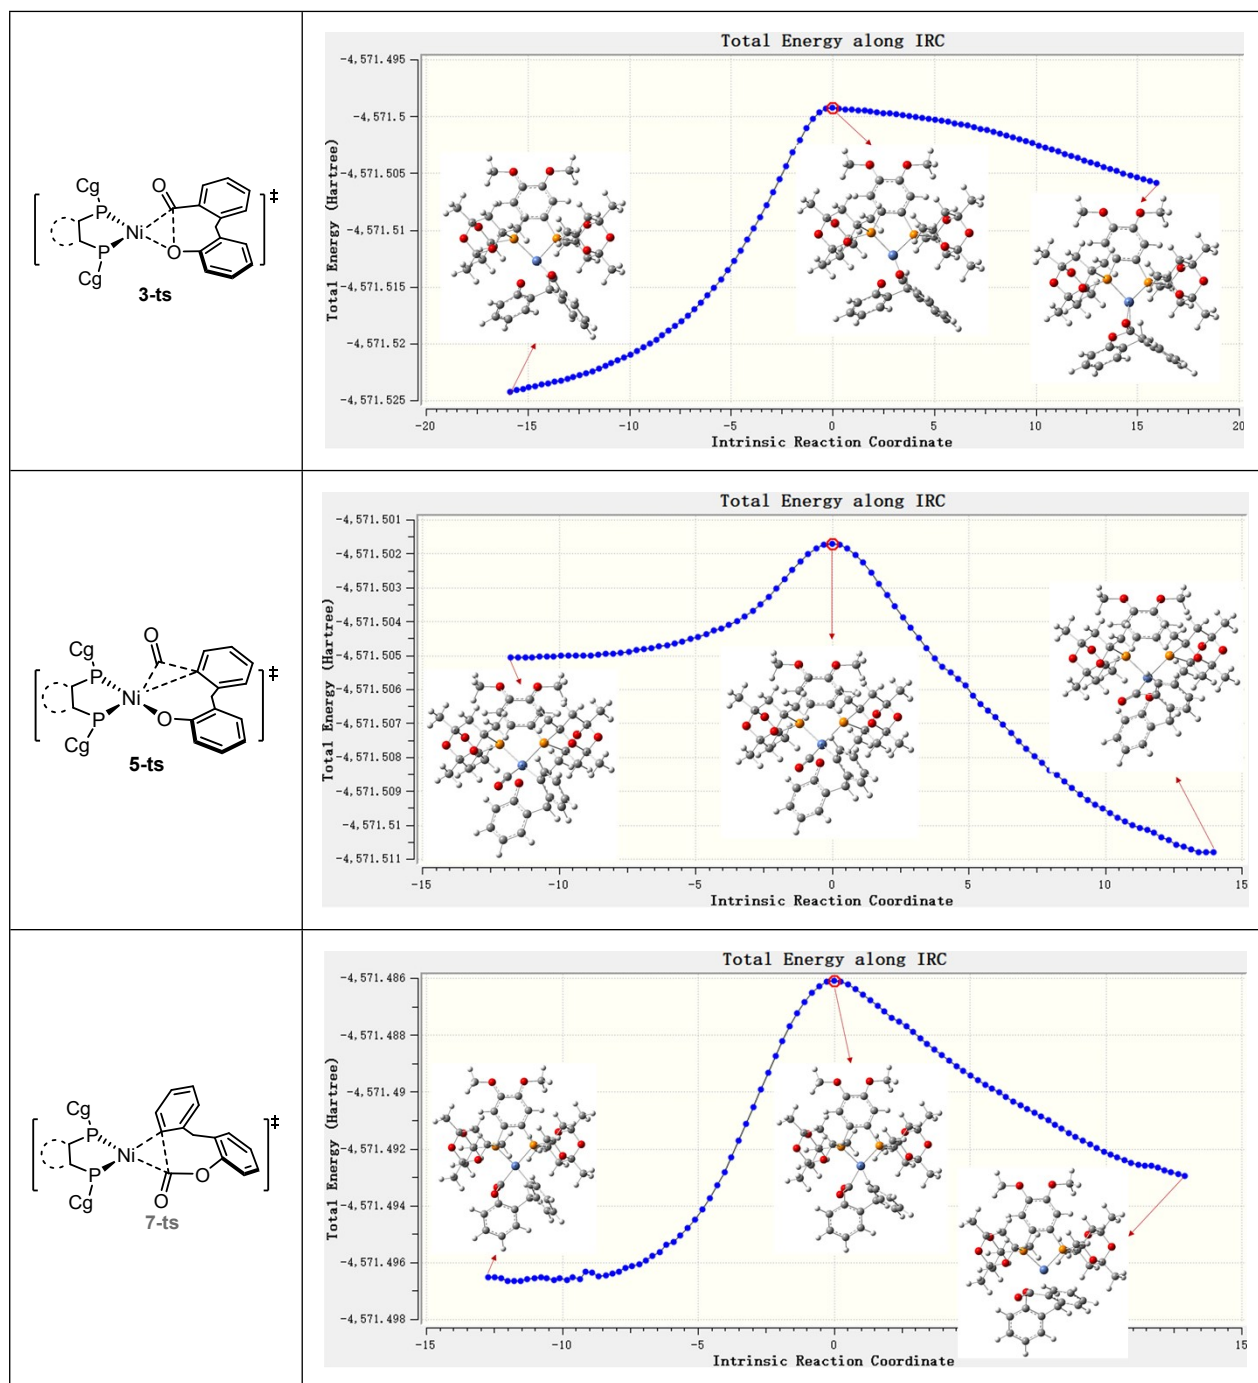

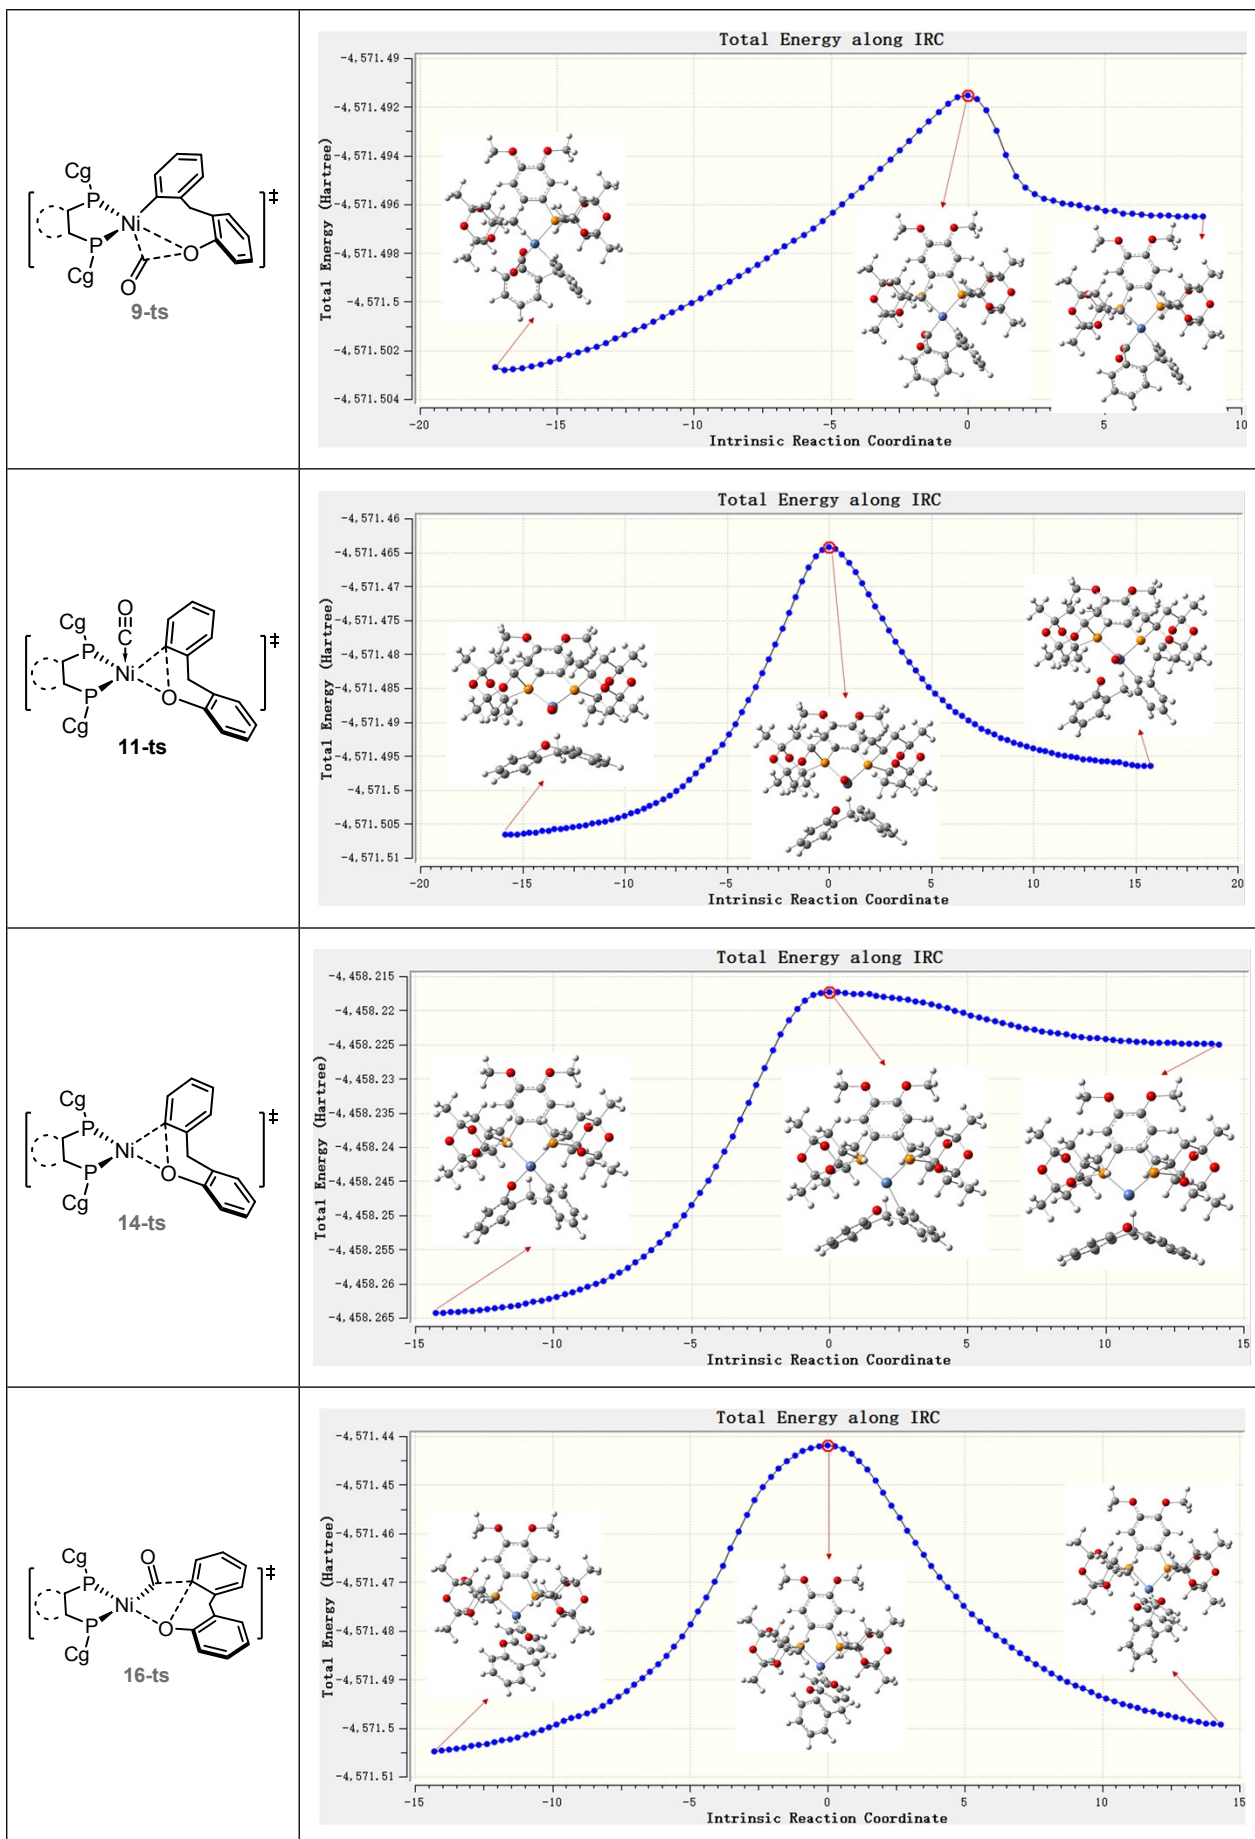

## Part 5: References

- (1) (a) Miertuš, S.; Tomasi, J. Approximate evaluations of the electrostatic free energy and internal energy changes in solution processes. *Chem. Phys.* **1982**, *65*, 239-245; (b) Miertuš, S.; Scrocco, E.; Tomasi, J. Electrostatic interaction of a solute with a continuum. A direct utilization of AB initio molecular potentials for the prevision of solvent effects. *Chem. Phys.* **1981**, *55*, 117-129; (c) Pascual-Ahuir, J. L.; Silla, E.; Tuñon, I. GEPOL: An improved description of molecular surfaces. III. A new algorithm for the computation of a solvent-excluding surface. *J. Comput. Chem.* **1994**, *15*, 1127-1138.
- (2) Zhao, Y.; Truhlar, D. G. The M06 suite of density functionals for main group thermochemistry, thermochemical kinetics, noncovalent interactions, excited states, and transition elements: two new functionals and systematic testing of four M06-class functionals and 12 other functionals. *Theor. Chem. Acc.* **2008**, *120*, 215-241.
- (3) Chai, J.-D.; Head-Gordon, M. Long-range corrected hybrid density functionals with damped atom-atom dispersion corrections. *Phys. Chem. Chem. Phys.* **2008**, *10*, 6615-6620.
- (4) (a) Stephens, P. J.; Devlin, F. J.; Chabalowski, C. F.; Frisch, M. J. Ab Initio Calculation of Vibrational Absorption and Circular Dichroism Spectra Using Density Functional Force Fields. *J. Phys. Chem.* **1994**, *98*, 11623-11627; (b) Grimme, S.; Antony, J.; Ehrlich, S.; Krieg, H. A consistent and accurate ab initio parametrization of density functional dispersion correction (DFT-D) for the 94 elements H-Pu. *J. Chem. Phys.* **2010**, *132*, 154104; (c) Becke, A. D. Density-functional exchange-energy approximation with correct asymptotic behavior. *Phys. Rev. A* **1988**, *38*, 3098-3100; (d) Becke, A. D. Density - functional thermochemistry. III. The role of exact exchange. *J. Chem. Phys.* **1993**, *98*, 5648-5652; (e) Lee, C.; Yang, W.; Parr, R. G. Development of the Colle-Salvetti correlation-energy formula into a functional of the electron density. *Phys. Rev. B* **1988**, *37*, 785-789.



## Part 6: The Energetic Information of Optimized Structures

**Table S4.** The quasi-harmonic corrected Gibbs free energies (qh-G(T)), Gibbs free energy corrections (GFEC), single-point energies ( $E$ ), Gibbs free energies ( $G=E + \text{GFEC}$ ) energies, and imaginary frequencies (IF) of the stationary points (SPs) involved in the reaction (unit: a.u.)

| SP                   | qh-G(T)      | GFEC      | $E$          | $G$          | IF              |
|----------------------|--------------|-----------|--------------|--------------|-----------------|
| Ni(COD) <sub>2</sub> | -2131.418850 | 0.299676  | -2132.582652 | -2132.282976 |                 |
| COD                  | -311.636876  | 0.135422  | -312.105802  | -311.970380  |                 |
| L1                   | -2373.383016 | 0.550112  | -2376.003947 | -2375.453835 |                 |
| 1                    | -689.267613  | 0.144496  | -690.150411  | -690.005915  |                 |
| 2(L1)                | -4570.786546 | 0.731730  | -4574.543803 | -4573.812073 |                 |
| 3-ts(L1)             | -4570.770140 | 0.729132  | -4574.521627 | -4573.792495 | 173.31 <i>i</i> |
| 4(L1)                | -4570.799056 | 0.727011  | -4574.544638 | -4573.817627 |                 |
| 5-ts(L1)             | -4570.774438 | 0.727280  | -4574.522557 | -4573.795277 | 143.69 <i>i</i> |
| 6(L1)                | -4570.779600 | 0.725188  | -4574.526356 | -4573.801168 |                 |
| 7-ts(L1)             | -4570.756753 | 0.729329  | -4574.507330 | -4573.778001 | 181.14 <i>i</i> |
| 8(L1)                | -4570.769698 | 0.728292  | -4574.516836 | -4573.788544 |                 |
| 9-ts(L1)             | -4570.764540 | 0.726977  | -4574.513850 | -4573.786873 | 226.01 <i>i</i> |
| CO                   | -113.225541  | -0.021084 | -113.339363  | -113.360447  |                 |
| 10(L1)               | -4570.774867 | 0.723397  | -4574.517859 | -4573.794462 |                 |
| 11-ts(L1)            | -4570.740895 | 0.722630  | -4574.485319 | -4573.762689 | 402.44 <i>i</i> |
| 12(L1)               | -3994.782602 | 0.549300  | -3997.759260 | -3997.209960 |                 |
| P                    | -576.025220  | 0.139807  | -576.777226  | -576.637419  |                 |
| 13(L1)               | -4457.543073 | 0.724280  | -4461.162013 | -4460.437733 |                 |
| 14-ts(L1)            | -4457.497443 | 0.719867  | -4461.115716 | -4460.395849 | 221.35 <i>i</i> |
| 15(L1)               | -3881.477033 | 0.547627  | -3884.332391 | -3883.784764 |                 |
| 16-ts(L1)            | -4570.717408 | 0.724504  | -4574.462999 | -4573.738495 | 306.24 <i>i</i> |
| 17(L1)               | -4684.044347 | 0.734102  | -4687.927459 | -4687.193357 |                 |
| 18-ts(L1)            | -4684.003016 | 0.731299  | -4687.881410 | -4687.150111 | 303.17 <i>i</i> |
| 19(L1)               | -4684.016284 | 0.731482  | -4687.892869 | -4687.161387 |                 |
| 2(L2)                | -3883.949733 | 0.521986  | -3886.713902 | -3886.191916 |                 |
| 3-ts(L2)             | -3883.931440 | 0.521290  | -3886.693944 | -3886.172654 | 151.43 <i>i</i> |
| 4(L2)                | -3883.961433 | 0.520432  | -3886.719073 | -3886.198641 |                 |
| 5-ts(L2)             | -3883.933497 | 0.517881  | -3886.691466 | -3886.173585 | 144.94 <i>i</i> |
| 6(L2)                | -3883.937414 | 0.516893  | -3886.694824 | -3886.177931 |                 |
| 10(L2)               | -3883.938138 | 0.516383  | -3886.694049 | -3886.177666 |                 |
| 11-ts(L2)            | -3883.901627 | 0.514064  | -3886.655330 | -3886.141266 | 388.71 <i>i</i> |
| 12(L2)               | -3307.938701 | 0.341925  | -3309.926944 | -3309.585019 |                 |
| 2(L3)                | -3588.846014 | 0.645931  | -3591.444844 | -3590.798913 |                 |

|                                        |              |          |              |              |                 |
|----------------------------------------|--------------|----------|--------------|--------------|-----------------|
| <b>3-ts(L3)</b>                        | -3588.827132 | 0.645597 | -3591.422770 | -3590.777173 | 205.43 <i>i</i> |
| <b>4(L3)</b>                           | -3588.858676 | 0.642014 | -3591.448886 | -3590.806872 |                 |
| <b>5-ts(L3)</b>                        | -3588.826898 | 0.640874 | -3591.418145 | -3590.777271 | 112.85 <i>i</i> |
| <b>6(L3)</b>                           | -3588.824020 | 0.640908 | -3591.418875 | -3590.777967 |                 |
| <b>10(L3)</b>                          | -3588.829715 | 0.638251 | -3591.414427 | -3590.776176 |                 |
| <b>11-ts(L3)</b>                       | -3588.788706 | 0.636943 | -3591.375763 | -3590.738820 | 387.63 <i>i</i> |
| <b>12(L3)</b>                          | -3012.841214 | 0.464934 | -3014.660992 | -3014.196058 |                 |
| <b>2(L4)</b>                           | -4677.216179 | 0.443328 | -4680.843760 | -4680.400432 |                 |
| <b>3-ts(L4)</b>                        | -4677.199505 | 0.442285 | -4680.824041 | -4680.381756 | 105.03 <i>i</i> |
| <b>4(L4)</b>                           | -4677.224602 | 0.443118 | -4680.846108 | -4680.402990 |                 |
| <b>5-ts(L4)</b>                        | -4677.196794 | 0.439012 | -4680.817921 | -4680.378909 | 153.38 <i>i</i> |
| <b>6(L4)</b>                           | -4677.198279 | 0.439367 | -4680.820430 | -4680.381063 |                 |
| <b>10(L4)</b>                          | -4677.201788 | 0.438922 | -4680.821308 | -4680.382386 |                 |
| <b>11-ts(L4)</b>                       | -4677.167063 | 0.436421 | -4680.784557 | -4680.348136 | 366.33 <i>i</i> |
| <b>12(L4)</b>                          | -4101.203607 | 0.262904 | -4104.055616 | -4103.792712 |                 |
| <b>2(L5)</b>                           | -4621.301574 | 0.480610 | -4624.847747 | -4624.367137 |                 |
| <b>3-ts(L5)</b>                        | -4621.281552 | 0.482445 | -4624.827162 | -4624.344717 | 285.95 <i>i</i> |
| <b>4(L5)</b>                           | -4621.304212 | 0.484353 | -4624.848129 | -4624.363776 |                 |
| <b>5-ts(L5)</b>                        | -4621.275909 | 0.478204 | -4624.816826 | -4624.338622 | 160.12 <i>i</i> |
| <b>6(L5)</b>                           | -4621.282363 | 0.476308 | -4624.823489 | -4624.347181 |                 |
| <b>10(L5)</b>                          | -4621.279653 | 0.479289 | -4624.821823 | -4624.342534 |                 |
| <b>11-ts(L5)</b>                       | -4621.254252 | 0.479254 | -4624.795379 | -4624.316125 | 350.13 <i>i</i> |
| <b>12(L5)</b>                          | -4045.285109 | 0.300518 | -4048.056985 | -4047.756467 |                 |
| <b>2(L6)</b>                           | -4256.664040 | 0.533704 | -4259.892103 | -4259.358399 |                 |
| <b>3-ts(L6)</b>                        | -4256.648122 | 0.530093 | -4259.871122 | -4259.341029 | 196.52 <i>i</i> |
| <b>4(L6)</b>                           | -4256.674987 | 0.529331 | -4259.892686 | -4259.363355 |                 |
| <b>5-ts(L6)</b>                        | -4256.652561 | 0.528531 | -4259.871447 | -4259.342916 | 132.95 <i>i</i> |
| <b>6(L6)</b>                           | -4256.661849 | 0.527586 | -4259.879960 | -4259.352374 |                 |
| <b>10(L6)</b>                          | -4256.664362 | 0.525135 | -4259.878713 | -4259.353578 |                 |
| <b>11-ts(L6)</b>                       | -4256.632929 | 0.525898 | -4259.848346 | -4259.322448 | 384.62 <i>i</i> |
| <b>12(L6)</b>                          | -3680.661210 | 0.352027 | -3683.111120 | -3682.759093 |                 |
| <b>2(L7)</b>                           | -3117.808533 | 0.329391 | -3119.592881 | -3119.263490 |                 |
| <b>3-ts(L7)</b>                        | -3117.792790 | 0.328697 | -3119.574345 | -3119.245648 | 94.67 <i>i</i>  |
| <b>4(L7)</b>                           | -3117.831802 | 0.326196 | -3119.605348 | -3119.279152 |                 |
| <b>5-ts(L7)</b>                        | -3117.803651 | 0.324493 | -3119.577159 | -3119.252666 | 171.67 <i>i</i> |
| <b>6(L7)</b>                           | -3117.814288 | 0.324282 | -3119.589089 | -3119.264807 |                 |
| <b>10(L7)</b>                          | -3117.816247 | 0.323189 | -3119.587903 | -3119.264714 |                 |
| <b>11-ts(L7)</b>                       | -3117.775550 | 0.322587 | -3119.547319 | -3119.224732 | 399.74 <i>i</i> |
| <b>12(L7)</b>                          | -2541.798925 | 0.151824 | -2542.809738 | -2542.657914 |                 |
| <b><sup>3</sup>Ni(COD)<sub>2</sub></b> | -2131.366908 | 0.291400 | -2132.525585 | -2132.234185 |                 |
| <b><sup>32</sup>(L1)</b>               | -4570.759111 | 0.724103 | -4574.503201 | -4573.779098 |                 |
| <b><sup>34</sup>(L1)</b>               | -4570.779137 | 0.722634 | -4574.519504 | -4573.796870 |                 |

|                           |              |          |              |              |  |
|---------------------------|--------------|----------|--------------|--------------|--|
| <b><sup>3</sup>6(L1)</b>  | -4570.759848 | 0.719285 | -4574.498643 | -4573.779358 |  |
| <b><sup>3</sup>10(L1)</b> | -4570.757211 | 0.720583 | -4574.496750 | -4573.776167 |  |
| <b><sup>3</sup>12(L1)</b> | -3994.734090 | 0.547341 | -3997.710864 | -3997.163523 |  |

## Part 7: Geometrical Coordinates of the Stationary Points

|                            |           |           |           |            |           |           |           |
|----------------------------|-----------|-----------|-----------|------------|-----------|-----------|-----------|
| <b>Ni(COD)<sub>2</sub></b> |           |           |           | H          | 2.140957  | -1.811335 | 1.586006  |
| Ni                         | 0.000000  | 0.000000  | 0.000000  |            |           |           |           |
| C                          | 1.171244  | 0.976480  | 1.476548  | <b>COD</b> |           |           |           |
| H                          | 2.025541  | 1.439040  | 0.970327  | C          | 1.565723  | -0.716254 | -0.495018 |
| C                          | -0.046308 | 1.634071  | 1.325277  | H          | 2.346284  | -1.072062 | -1.179332 |
| H                          | -0.026035 | 2.559670  | 0.737577  | C          | 1.576249  | 0.597219  | -0.222279 |
| C                          | -1.171244 | -0.976480 | 1.476548  | H          | 2.348710  | 1.186414  | -0.732225 |
| H                          | -2.025541 | -1.439040 | 0.970327  | C          | -1.576249 | -0.597219 | -0.222279 |
| C                          | 0.046308  | -1.634071 | 1.325277  | H          | -2.348710 | -1.186414 | -0.732225 |
| H                          | 0.026035  | -2.559670 | 0.737577  | C          | -1.565723 | 0.716254  | -0.495018 |
| C                          | -1.634071 | -0.046308 | -1.325277 | H          | -2.346284 | 1.072062  | -1.179332 |
| H                          | -2.559670 | -0.026035 | -0.737577 | C          | 0.654482  | 1.389857  | 0.659554  |
| C                          | -0.976480 | 1.171244  | -1.476548 | H          | 0.444936  | 0.863510  | 1.600624  |
| H                          | -1.439040 | 2.025541  | -0.970327 | H          | 1.172656  | 2.311588  | 0.965335  |
| C                          | 0.976480  | -1.171244 | -1.476548 | C          | -0.654482 | 1.799494  | -0.015452 |
| H                          | 1.439040  | -2.025541 | -0.970327 | H          | -1.218943 | 2.464797  | 0.664260  |
| C                          | 1.634071  | 0.046308  | -1.325277 | H          | -0.420249 | 2.446819  | -0.879489 |
| H                          | 2.559670  | 0.026035  | -0.737577 | C          | -0.654482 | -1.389857 | 0.659554  |
| C                          | 0.000000  | 1.524136  | -2.576527 | H          | -1.172656 | -2.311588 | 0.965335  |
| H                          | -0.250618 | 0.976420  | -3.497821 | H          | -0.444936 | -0.863510 | 1.600624  |
| H                          | -0.124278 | 2.585264  | -2.842486 | C          | 0.654482  | -1.799494 | -0.015452 |
| C                          | 1.451865  | 1.275743  | -2.169844 | H          | 0.420249  | -2.446819 | -0.879489 |
| H                          | 2.110044  | 1.246470  | -3.060775 | H          | 1.218943  | -2.464797 | 0.664260  |
| H                          | 1.811335  | 2.140957  | -1.586006 | <b>LI</b>  |           |           |           |
| C                          | 0.000000  | -1.524136 | -2.576527 | P          | -1.556418 | -0.961248 | 0.173726  |
| H                          | 0.124278  | -2.585264 | -2.842486 | P          | 1.643956  | -0.857195 | 0.651963  |
| H                          | 0.250618  | -0.976420 | -3.497821 | O          | -5.354175 | -1.038678 | -0.024585 |
| C                          | -1.451865 | -1.275743 | -2.169844 | O          | -3.857842 | 0.456952  | 0.966711  |
| H                          | -1.811335 | -2.140957 | -1.586006 | O          | -3.581235 | -2.306676 | -0.880648 |
| H                          | -2.110044 | -1.246470 | -3.060775 | O          | -1.291802 | 4.305039  | -0.289487 |
| C                          | -1.275743 | 1.451865  | 2.169844  | O          | 1.311699  | 4.330343  | -0.153866 |
| H                          | -2.140957 | 1.811335  | 1.586006  | O          | 4.091327  | 0.587965  | 0.518982  |
| H                          | -1.246470 | 2.110044  | 3.060775  | O          | 5.265625  | -1.159743 | -0.477069 |
| C                          | 1.524136  | 0.000000  | 2.576527  | O          | 3.371086  | -2.521583 | -0.567161 |
| H                          | 0.976420  | 0.250618  | 3.497821  | C          | -2.955542 | -0.579602 | 1.401393  |
| H                          | 2.585264  | 0.124278  | 2.842486  | C          | -2.394690 | -0.118323 | 2.723288  |
| C                          | -1.524136 | 0.000000  | 2.576527  | H          | -1.694378 | -0.861944 | 3.129304  |
| H                          | -2.585264 | -0.124278 | 2.842486  | H          | -3.204281 | 0.032771  | 3.452812  |
| H                          | -0.976420 | -0.250618 | 3.497821  | H          | -1.854475 | 0.833049  | 2.615303  |
| C                          | 1.275743  | -1.451865 | 2.169844  | C          | -3.747937 | -1.877311 | 1.512005  |
| H                          | 1.246470  | -2.110044 | 3.060775  |            |           |           |           |

|   |           |           |           |          |           |           |           |
|---|-----------|-----------|-----------|----------|-----------|-----------|-----------|
| H | -4.494315 | -1.783008 | 2.317638  | H        | 6.277288  | -3.154269 | 0.882790  |
| H | -3.086433 | -2.720929 | 1.756712  | H        | 5.648220  | -3.722101 | -0.684708 |
| C | -4.488010 | -2.143248 | 0.203840  | C        | 4.094391  | -1.569135 | 1.555693  |
| C | -5.337763 | -3.382578 | 0.236370  | H        | 3.508558  | -2.307053 | 2.123472  |
| H | -5.864685 | -3.496888 | -0.718893 | H        | 5.010496  | -1.349899 | 2.127842  |
| H | -6.080411 | -3.318738 | 1.040960  | C        | 3.307960  | -0.270683 | 1.367300  |
| H | -4.712172 | -4.268552 | 0.400087  | C        | 3.125271  | 0.472178  | 2.668644  |
| C | -4.634422 | 0.174204  | -0.188499 | H        | 2.597863  | -0.154216 | 3.401183  |
| C | -5.643222 | 1.282529  | -0.307713 | H        | 2.545442  | 1.396313  | 2.536207  |
| H | -6.308561 | 1.103084  | -1.161005 | H        | 4.104826  | 0.744331  | 3.089762  |
| H | -5.140087 | 2.247762  | -0.450283 | C        | 2.493139  | -1.452547 | -0.951405 |
| H | -6.248773 | 1.334952  | 0.605401  | C        | 3.322603  | -0.350440 | -1.592691 |
| C | -3.761368 | 0.014782  | -1.429320 | H        | 2.705303  | 0.536149  | -1.802036 |
| H | -4.429769 | -0.198172 | -2.279857 | H        | 3.716021  | -0.714387 | -2.556343 |
| H | -3.219540 | 0.939194  | -1.670016 | C        | 1.485267  | -2.043894 | -1.900260 |
| C | -2.808363 | -1.151023 | -1.260089 | H        | 1.988085  | -2.448360 | -2.792091 |
| C | -2.116947 | -1.512608 | -2.549225 | H        | 0.771626  | -1.275558 | -2.229330 |
| H | -1.501492 | -2.413777 | -2.428342 | H        | 0.923769  | -2.857288 | -1.420540 |
| H | -1.473071 | -0.688958 | -2.890289 |          |           |           |           |
| H | -2.859357 | -1.712291 | -3.336760 | <b>I</b> |           |           |           |
| C | -0.676981 | 0.656976  | 0.036475  | O        | 0.666853  | 1.702482  | 0.469319  |
| C | -1.352777 | 1.886201  | -0.113372 | C        | 1.514784  | 0.672780  | 0.108927  |
| H | -2.439042 | 1.891079  | -0.121221 | C        | 2.614824  | 1.013432  | -0.675805 |
| C | -0.688891 | 3.105132  | -0.168400 | H        | 2.719678  | 2.045089  | -1.016318 |
| C | -2.694088 | 4.327633  | -0.374364 | C        | 3.552864  | 0.037358  | -1.001408 |
| H | -3.060942 | 3.788174  | -1.264564 | H        | 4.413815  | 0.300824  | -1.619769 |
| H | -2.989012 | 5.379445  | -0.459642 | C        | 3.391162  | -1.267684 | -0.538599 |
| H | -3.171473 | 3.900496  | 0.523904  | H        | 4.125821  | -2.035659 | -0.789839 |
| C | 0.723694  | 3.120205  | -0.083846 | C        | 2.287928  | -1.592244 | 0.249190  |
| C | 2.711984  | 4.387200  | -0.043108 | H        | 2.157985  | -2.613819 | 0.617186  |
| H | 3.073164  | 3.968343  | 0.911373  | C        | 1.337872  | -0.628012 | 0.593276  |
| H | 2.989758  | 5.446072  | -0.088096 | C        | 0.117877  | -0.931754 | 1.409511  |
| H | 3.214186  | 3.856643  | -0.869405 | H        | 0.073475  | -0.250822 | 2.277933  |
| C | 1.401469  | 1.918976  | 0.083573  | H        | 0.169069  | -1.950527 | 1.814267  |
| H | 2.486589  | 1.934689  | 0.169994  | C        | -1.111621 | -0.765425 | 0.564209  |
| C | 0.735246  | 0.678157  | 0.167215  | C        | -1.931794 | -1.856517 | 0.261735  |
| C | 4.512270  | 0.019020  | -0.712859 | H        | -1.675166 | -2.838455 | 0.668926  |
| C | 5.435341  | 1.020672  | -1.349308 | C        | -3.063356 | -1.708597 | -0.535886 |
| H | 6.261925  | 1.250007  | -0.665341 | H        | -3.685500 | -2.578163 | -0.760773 |
| H | 4.896444  | 1.949512  | -1.576607 | C        | -3.404924 | -0.453023 | -1.037825 |
| H | 5.851659  | 0.619411  | -2.281341 | H        | -4.295987 | -0.329151 | -1.656679 |
| C | 4.503312  | -2.149301 | 0.203477  | C        | -2.607805 | 0.644332  | -0.737891 |
| C | 5.364492  | -3.376021 | 0.316782  | H        | -2.866298 | 1.640009  | -1.104315 |
| H | 4.817874  | -4.180296 | 0.824047  | C        | -1.448738 | 0.498687  | 0.038139  |

|              |           |           |           |   |           |           |           |
|--------------|-----------|-----------|-----------|---|-----------|-----------|-----------|
| C            | -0.695225 | 1.743905  | 0.333438  | H | 1.432281  | 3.734061  | 0.862807  |
| O            | -1.224352 | 2.818423  | 0.453597  | C | 3.433831  | 3.015665  | 1.137385  |
|              |           |           |           | C | 3.163314  | 5.285701  | 1.714273  |
| <b>2(L1)</b> |           |           |           | H | 2.814645  | 5.604724  | 0.717624  |
| Ni           | -0.450327 | -0.698880 | -0.318217 | H | 3.781783  | 6.083052  | 2.140209  |
| P            | -0.170571 | 1.396077  | -0.184799 | H | 2.288062  | 5.132656  | 2.366872  |
| P            | 1.692067  | -1.001500 | -0.415599 | C | 4.295008  | 1.891399  | 1.050751  |
| O            | -2.455000 | 4.379530  | -0.568943 | C | 6.428579  | 0.973227  | 1.445488  |
| O            | -0.796380 | 3.832009  | 0.984110  | H | 6.066611  | 0.135414  | 2.064172  |
| O            | -2.061047 | 2.416150  | -1.776355 | H | 7.388095  | 1.316625  | 1.846982  |
| O            | 3.976711  | 4.139641  | 1.639283  | H | 6.588460  | 0.614080  | 0.414747  |
| O            | 5.554756  | 2.075245  | 1.485925  | C | 3.796097  | 0.691889  | 0.553166  |
| O            | 3.751906  | -2.433715 | 0.760995  | H | 4.438499  | -0.186585 | 0.549229  |
| O            | 3.732665  | -4.136422 | -0.846844 | C | 2.461119  | 0.568109  | 0.127403  |
| O            | 2.050336  | -3.052039 | -2.058699 | C | 4.324357  | -2.909246 | -0.453445 |
| O            | -2.527106 | -1.107556 | 1.494854  | C | 5.773051  | -3.182233 | -0.159619 |
| C            | -1.162444 | 2.440900  | 1.037193  | H | 5.854725  | -3.919966 | 0.647768  |
| C            | -0.938315 | 1.976457  | 2.452783  | H | 6.283526  | -2.262601 | 0.154203  |
| H            | -1.243338 | 0.925394  | 2.555031  | H | 6.277243  | -3.578595 | -1.049313 |
| H            | -1.534966 | 2.582841  | 3.149970  | C | 2.328315  | -4.017517 | -1.044943 |
| H            | 0.118459  | 2.062000  | 2.744944  | C | 1.829774  | -5.333360 | -1.568102 |
| C            | -2.613446 | 2.305769  | 0.593221  | H | 0.748303  | -5.284884 | -1.743498 |
| H            | -3.264251 | 2.773787  | 1.349681  | H | 2.036191  | -6.133943 | -0.847711 |
| H            | -2.892595 | 1.245042  | 0.511744  | H | 2.331516  | -5.572780 | -2.513656 |
| C            | -2.829544 | 3.015806  | -0.738739 | C | 1.707312  | -3.620476 | 0.290509  |
| C            | -4.256669 | 2.984901  | -1.203776 | H | 0.616075  | -3.522436 | 0.198255  |
| H            | -4.354198 | 3.543764  | -2.142692 | H | 1.924267  | -4.416551 | 1.020873  |
| H            | -4.917271 | 3.437550  | -0.454017 | C | 2.320183  | -2.316251 | 0.781713  |
| H            | -4.569821 | 1.947018  | -1.378962 | C | 1.915823  | -1.975509 | 2.193356  |
| C            | -1.085834 | 4.516490  | -0.231425 | H | 0.823696  | -1.850959 | 2.245697  |
| C            | -0.830263 | 5.973522  | 0.035297  | H | 2.384667  | -1.040435 | 2.532427  |
| H            | -1.064568 | 6.573216  | -0.852600 | H | 2.210961  | -2.777114 | 2.886179  |
| H            | 0.221634  | 6.137701  | 0.303165  | C | 2.630819  | -1.751624 | -1.884262 |
| H            | -1.460861 | 6.314405  | 0.865386  | C | 4.112089  | -1.915575 | -1.593383 |
| C            | -0.265965 | 3.958373  | -1.393219 | H | 4.585783  | -0.947143 | -1.377704 |
| H            | -0.505015 | 4.551693  | -2.291220 | H | 4.603434  | -2.323859 | -2.491882 |
| H            | 0.812741  | 4.066952  | -1.209381 | C | 2.359745  | -0.985908 | -3.152156 |
| C            | -0.636764 | 2.508866  | -1.653641 | H | 2.843678  | -1.480117 | -4.007555 |
| C            | -0.058059 | 1.966609  | -2.933542 | H | 2.749716  | 0.039399  | -3.081399 |
| H            | -0.371897 | 0.924070  | -3.085065 | H | 1.280635  | -0.937724 | -3.352791 |
| H            | 1.040649  | 2.000376  | -2.910721 | C | -3.362236 | -2.040902 | 2.057053  |
| H            | -0.404373 | 2.558007  | -3.794112 | C | -2.864894 | -3.058292 | 2.866651  |
| C            | 1.599369  | 1.680655  | 0.228618  | H | -1.787172 | -3.128777 | 3.027144  |
| C            | 2.108209  | 2.890797  | 0.735398  | C | -3.754279 | -3.962185 | 3.448657  |

|                 |           |           |           |   |           |           |           |
|-----------------|-----------|-----------|-----------|---|-----------|-----------|-----------|
| H               | -3.373598 | -4.764240 | 4.086084  | C | -5.327712 | 1.199624  | -1.155763 |
| C               | -5.123823 | -3.845988 | 3.213777  | H | -5.598343 | 1.588094  | -2.145352 |
| H               | -5.819601 | -4.555275 | 3.668279  | H | -6.099795 | 1.499202  | -0.436436 |
| C               | -5.609003 | -2.822809 | 2.397099  | H | -5.291979 | 0.104228  | -1.203959 |
| H               | -6.683967 | -2.729298 | 2.215802  | C | -2.870088 | 3.783736  | -0.400631 |
| C               | -4.734813 | -1.906783 | 1.809170  | C | -3.132147 | 5.256619  | -0.253396 |
| C               | -5.168477 | -0.763848 | 0.939252  | H | -3.556611 | 5.663131  | -1.179310 |
| H               | -4.815762 | 0.175678  | 1.405365  | H | -2.202877 | 5.795284  | -0.027847 |
| H               | -6.265486 | -0.699514 | 0.928758  | H | -3.844495 | 5.426654  | 0.563320  |
| C               | -4.671467 | -0.824617 | -0.487425 | C | -1.897119 | 3.445114  | -1.525773 |
| C               | -5.602516 | -0.614029 | -1.516012 | H | -2.304364 | 3.857174  | -2.463911 |
| H               | -6.644926 | -0.423251 | -1.242138 | H | -0.918977 | 3.919676  | -1.357143 |
| C               | -5.243295 | -0.643966 | -2.859329 | C | -1.755840 | 1.939021  | -1.671157 |
| H               | -5.996190 | -0.470802 | -3.632074 | C | -1.036349 | 1.530016  | -2.927399 |
| C               | -3.916689 | -0.905659 | -3.205272 | H | -1.000097 | 0.434224  | -3.001482 |
| H               | -3.613051 | -0.936090 | -4.254519 | H | -0.009330 | 1.922342  | -2.931016 |
| C               | -2.984622 | -1.134693 | -2.204053 | H | -1.557773 | 1.922768  | -3.813279 |
| H               | -1.940862 | -1.349826 | -2.458736 | C | 0.617937  | 2.107666  | 0.228565  |
| C               | -3.328310 | -1.093702 | -0.840670 | C | 0.623191  | 3.424418  | 0.727150  |
| C               | -2.215495 | -1.343888 | 0.120422  | H | -0.321518 | 3.954872  | 0.824653  |
| O               | -1.378651 | -2.311995 | -0.114995 | C | 1.792518  | 4.042576  | 1.157885  |
| <b>3-ts(L1)</b> |           |           |           | C | 0.677321  | 6.060281  | 1.658033  |
| Ni              | -0.338362 | -0.867657 | -0.543933 | H | 0.280012  | 6.205420  | 0.639317  |
| P               | -0.921131 | 1.152695  | -0.144387 | H | 0.939994  | 7.039167  | 2.073764  |
| P               | 1.759412  | -0.290702 | -0.499286 | H | -0.110946 | 5.611700  | 2.285680  |
| O               | -4.107184 | 3.161825  | -0.693599 | C | 3.015228  | 3.325150  | 1.117435  |
| O               | -2.374917 | 3.337586  | 0.857756  | C | 5.323447  | 3.280186  | 1.601777  |
| O               | -3.065427 | 1.357039  | -1.750083 | H | 5.282777  | 2.357986  | 2.205115  |
| O               | 1.856161  | 5.293467  | 1.651452  | H | 6.061524  | 3.956867  | 2.046213  |
| O               | 4.095996  | 3.966582  | 1.599985  | H | 5.653600  | 3.026058  | 0.580385  |
| O               | 4.195706  | -0.877786 | 0.689648  | C | 3.021379  | 2.032158  | 0.606104  |
| O               | 4.892144  | -2.326522 | -1.010319 | H | 3.948553  | 1.462305  | 0.618943  |
| O               | 2.949088  | -1.908663 | -2.248605 | C | 1.844275  | 1.417602  | 0.140054  |
| O               | -0.655054 | -2.935261 | -0.157211 | C | 4.937041  | -0.997820 | -0.522688 |
| C               | -2.225276 | 1.915772  | 1.026657  | C | 6.367205  | -0.693931 | -0.173944 |
| C               | -1.861983 | 1.711007  | 2.475362  | H | 6.717467  | -1.391095 | 0.596938  |
| H               | -1.715808 | 0.646199  | 2.699136  | H | 6.461488  | 0.329825  | 0.210298  |
| H               | -2.660223 | 2.096295  | 3.127133  | H | 7.007839  | -0.797817 | -1.057851 |
| H               | -0.932838 | 2.239084  | 2.733003  | C | 3.562794  | -2.754476 | -1.280581 |
| C               | -3.542476 | 1.260216  | 0.631284  | C | 3.641969  | -4.119291 | -1.903061 |
| H               | -4.318672 | 1.526790  | 1.367200  | H | 2.635414  | -4.483197 | -2.143798 |
| H               | -3.450806 | 0.166831  | 0.614277  | H | 4.123039  | -4.827016 | -1.217028 |
| C               | -3.990360 | 1.745463  | -0.744290 | H | 4.228306  | -4.072869 | -2.828961 |
|                 |           |           |           | C | 2.796470  | -2.732428 | 0.036602  |

|              |           |           |           |   |           |           |           |
|--------------|-----------|-----------|-----------|---|-----------|-----------|-----------|
| H            | 1.754102  | -3.037710 | -0.129931 | P | -1.684294 | -0.535127 | 0.134340  |
| H            | 3.264812  | -3.450440 | 0.729479  | O | 3.833708  | 3.519818  | 0.238737  |
| C            | 2.836491  | -1.336504 | 0.646501  | O | 1.897353  | 3.473502  | -1.074270 |
| C            | 2.302341  | -1.297620 | 2.055858  | O | 3.041982  | 1.716635  | 1.513521  |
| H            | 1.248611  | -1.615938 | 2.065840  | O | -2.503574 | 5.240055  | -1.168632 |
| H            | 2.356724  | -0.283530 | 2.477545  | O | -4.565683 | 3.660603  | -1.257155 |
| H            | 2.876276  | -1.972858 | 2.707620  | O | -4.290654 | -1.123871 | -0.571844 |
| C            | 2.953256  | -0.503034 | -1.966058 | O | -4.590841 | -2.739581 | 1.088812  |
| C            | 4.371002  | -0.089747 | -1.611490 | O | -2.438042 | -2.386273 | 1.929318  |
| H            | 4.414680  | 0.967790  | -1.317278 | O | 0.504959  | -2.799027 | 0.273503  |
| H            | 5.004168  | -0.203721 | -2.506582 | C | 1.864984  | 2.041033  | -1.154847 |
| C            | 2.431637  | 0.182828  | -3.200489 | C | 1.326439  | 1.706847  | -2.523075 |
| H            | 3.091481  | -0.023660 | -4.056229 | H | 1.237396  | 0.619869  | -2.657134 |
| H            | 2.391707  | 1.271755  | -3.054089 | H | 1.999117  | 2.098126  | -3.300042 |
| H            | 1.425274  | -0.178937 | -3.451707 | H | 0.333923  | 2.152719  | -2.678041 |
| C            | -0.761844 | -3.615489 | 1.010797  | C | 3.266794  | 1.514543  | -0.903261 |
| C            | 0.050467  | -4.750662 | 1.152501  | H | 3.921298  | 1.811216  | -1.738524 |
| H            | 0.672290  | -5.052939 | 0.306842  | H | 3.268153  | 0.420237  | -0.841952 |
| C            | 0.055859  | -5.470176 | 2.342824  | C | 3.827716  | 2.106558  | 0.384321  |
| H            | 0.698499  | -6.348984 | 2.438955  | C | 5.237680  | 1.679606  | 0.672750  |
| C            | -0.759948 | -5.074577 | 3.403437  | H | 5.580077  | 2.137943  | 1.608493  |
| H            | -0.758893 | -5.633947 | 4.341616  | H | 5.901462  | 1.998677  | -0.139803 |
| C            | -1.587258 | -3.963795 | 3.251646  | H | 5.295188  | 0.588796  | 0.770805  |
| H            | -2.238910 | -3.652012 | 4.073732  | C | 2.530976  | 4.043837  | 0.071119  |
| C            | -1.602422 | -3.219821 | 2.067797  | C | 2.666334  | 5.514181  | -0.208561 |
| C            | -2.490859 | -2.031309 | 1.872986  | H | 3.185612  | 6.012042  | 0.619027  |
| H            | -1.858673 | -1.178462 | 1.543028  | H | 1.678885  | 5.976534  | -0.332755 |
| H            | -2.973016 | -1.751549 | 2.820474  | H | 3.244351  | 5.665382  | -1.128259 |
| C            | -3.522576 | -2.277076 | 0.810357  | C | 1.749262  | 3.730877  | 1.339624  |
| C            | -4.869076 | -2.467799 | 1.129318  | H | 2.275753  | 4.201215  | 2.185815  |
| H            | -5.173524 | -2.442924 | 2.179847  | H | 0.738020  | 4.158799  | 1.313967  |
| C            | -5.823114 | -2.674534 | 0.133625  | C | 1.704725  | 2.232449  | 1.586085  |
| H            | -6.871597 | -2.818980 | 0.406015  | C | 1.163244  | 1.904809  | 2.953374  |
| C            | -5.438040 | -2.687238 | -1.207716 | H | 1.145457  | 0.823266  | 3.130316  |
| H            | -6.181991 | -2.843194 | -1.992654 | H | 0.145589  | 2.306151  | 3.062569  |
| C            | -4.102308 | -2.495614 | -1.544263 | H | 1.796328  | 2.371077  | 3.722620  |
| H            | -3.776211 | -2.489935 | -2.586673 | C | -0.871305 | 2.084784  | -0.129818 |
| C            | -3.136034 | -2.304901 | -0.545529 | C | -1.043574 | 3.443827  | -0.458484 |
| C            | -1.750865 | -2.063769 | -0.971248 | H | -0.181090 | 4.102021  | -0.492368 |
| O            | -1.328920 | -1.981082 | -2.134416 | C | -2.281107 | 3.958454  | -0.828058 |
|              |           |           |           | C | -1.411083 | 6.126699  | -1.149946 |
| <b>4(L1)</b> |           |           |           | H | -0.981536 | 6.225085  | -0.138633 |
| Ni           | 0.535118  | -0.853695 | 0.340856  | H | -1.793942 | 7.103941  | -1.462775 |
| P            | 0.759763  | 1.306149  | 0.214615  | H | -0.616663 | 5.817752  | -1.849447 |



|   |           |           |           |                 |           |           |           |
|---|-----------|-----------|-----------|-----------------|-----------|-----------|-----------|
| C | -3.406077 | 3.096345  | -0.881395 | C               | 2.454784  | -1.909500 | -1.675611 |
| C | -5.714006 | 2.846491  | -1.290081 | H               | 1.752831  | -1.101721 | -1.376956 |
| H | -5.608531 | 2.006054  | -1.995531 | H               | 2.859040  | -1.636210 | -2.662795 |
| H | -6.541066 | 3.482833  | -1.622276 | C               | 3.587326  | -1.987149 | -0.681771 |
| H | -5.955282 | 2.445553  | -0.292036 | C               | 4.850222  | -2.404822 | -1.123849 |
| C | -3.242408 | 1.752216  | -0.566895 | H               | 4.991067  | -2.620894 | -2.187308 |
| H | -4.092676 | 1.076170  | -0.644249 | C               | 5.916224  | -2.559019 | -0.243025 |
| C | -1.989993 | 1.230321  | -0.191062 | H               | 6.889579  | -2.882757 | -0.620258 |
| C | -4.751198 | -1.375361 | 0.757761  | C               | 5.739783  | -2.304532 | 1.119384  |
| C | -6.225377 | -1.081458 | 0.752507  | H               | 6.569990  | -2.432832 | 1.818185  |
| H | -6.725612 | -1.714580 | 0.009654  | C               | 4.498486  | -1.884318 | 1.575391  |
| H | -6.408971 | -0.029532 | 0.499648  | H               | 4.328345  | -1.667044 | 2.632808  |
| H | -6.658694 | -1.287500 | 1.738516  | C               | 3.418424  | -1.714729 | 0.691890  |
| C | -3.227196 | -3.149838 | 1.025413  | C               | 2.147564  | -1.209402 | 1.276918  |
| C | -3.160869 | -4.570084 | 1.507860  | O               | 1.962966  | -1.184994 | 2.478045  |
| H | -2.117482 | -4.904844 | 1.541072  |                 |           |           |           |
| H | -3.731670 | -5.231615 | 0.845231  | <b>5-ts(L1)</b> |           |           |           |
| H | -3.580454 | -4.634421 | 2.519205  | P               | -1.436664 | 0.675278  | -0.052027 |
| C | -2.755218 | -2.969558 | -0.412615 | P               | 1.592342  | 0.313961  | -0.323972 |
| H | -1.702675 | -3.269059 | -0.498079 | O               | -5.182489 | 1.118253  | -0.283350 |
| H | -3.357944 | -3.624016 | -1.062084 | O               | -3.552628 | 1.994662  | 1.146754  |
| C | -2.943491 | -1.525895 | -0.862999 | O               | -3.561996 | -0.045093 | -1.510289 |
| C | -2.733621 | -1.340721 | -2.344619 | O               | -0.436869 | 5.706170  | 1.231999  |
| H | -1.718570 | -1.654953 | -2.627756 | O               | 2.114919  | 5.427748  | 0.802128  |
| H | -2.866419 | -0.291611 | -2.645497 | O               | 4.140331  | 1.084286  | 0.385959  |
| H | -3.452908 | -1.951453 | -2.909062 | O               | 5.208714  | -0.398148 | -1.072312 |
| C | -2.507536 | -0.968234 | 1.793053  | O               | 3.150903  | -1.144306 | -1.890677 |
| C | -3.969938 | -0.550164 | 1.779169  | C               | -2.817743 | 0.763661  | 1.236155  |
| H | -4.078569 | 0.526869  | 1.585094  | C               | -2.252714 | 0.681418  | 2.629868  |
| H | -4.399457 | -0.748833 | 2.774432  | H               | -1.632244 | -0.220874 | 2.739331  |
| C | -1.720573 | -0.382869 | 2.935595  | H               | -3.066536 | 0.660890  | 3.369521  |
| H | -2.160011 | -0.688268 | 3.896599  | H               | -1.617203 | 1.551505  | 2.848649  |
| H | -1.725893 | 0.715540  | 2.888205  | C               | -3.757654 | -0.384933 | 0.890459  |
| H | -0.677678 | -0.734121 | 2.904937  | H               | -4.506638 | -0.489622 | 1.691285  |
| C | 0.822040  | -3.583109 | -0.724297 | H               | -3.204981 | -1.329820 | 0.812036  |
| C | 0.254636  | -4.883006 | -0.793682 | C               | -4.483034 | -0.110647 | -0.421441 |
| H | -0.406648 | -5.189524 | 0.020832  | C               | -5.490947 | -1.164297 | -0.779244 |
| C | 0.531289  | -5.750712 | -1.841852 | H               | -5.976505 | -0.906062 | -1.728605 |
| H | 0.070982  | -6.743354 | -1.851365 | H               | -6.258928 | -1.235269 | 0.000472  |
| C | 1.386531  | -5.365456 | -2.878094 | H               | -4.998921 | -2.139013 | -0.887104 |
| H | 1.599327  | -6.039456 | -3.710778 | C               | -4.308307 | 2.205312  | -0.044163 |
| C | 1.976748  | -4.104140 | -2.817170 | C               | -5.156341 | 3.421160  | 0.203948  |
| H | 2.670462  | -3.792674 | -3.606588 | H               | -5.792782 | 3.629080  | -0.664556 |
| C | 1.720602  | -3.214699 | -1.769527 | H               | -4.526185 | 4.298729  | 0.396801  |

|   |           |           |           |              |           |           |           |
|---|-----------|-----------|-----------|--------------|-----------|-----------|-----------|
| H | -5.797894 | 3.252370  | 1.077139  | C            | 3.700863  | 1.191221  | -1.998926 |
| C | -3.394351 | 2.332337  | -1.257119 | H            | 3.308861  | 2.216908  | -1.932581 |
| H | -4.026378 | 2.519532  | -2.140358 | H            | 4.205468  | 1.096375  | -2.973901 |
| H | -2.712060 | 3.188515  | -1.160433 | C            | 1.681473  | 0.195066  | -3.143299 |
| C | -2.630402 | 1.037761  | -1.491132 | H            | 2.265952  | -0.006546 | -4.052614 |
| C | -1.910109 | 1.040128  | -2.812655 | H            | 1.196810  | 1.175181  | -3.253382 |
| H | -1.351630 | 0.107644  | -2.961776 | H            | 0.903518  | -0.577922 | -3.057188 |
| H | -1.206211 | 1.883165  | -2.862741 | Ni           | -0.060440 | -1.136691 | -0.108437 |
| H | -2.631555 | 1.145838  | -3.636055 | O            | 0.182170  | -1.537509 | 1.968568  |
| C | -0.393777 | 2.158121  | 0.192768  | C            | 0.509827  | -2.773823 | 2.236937  |
| C | -0.883816 | 3.406761  | 0.620116  | C            | 1.756992  | -3.125733 | 2.819514  |
| H | -1.943539 | 3.508250  | 0.846488  | H            | 2.445522  | -2.321369 | 3.093777  |
| C | -0.037631 | 4.493053  | 0.815484  | C            | 2.120464  | -4.453381 | 3.025448  |
| C | -1.814787 | 5.916366  | 1.430410  | H            | 3.100868  | -4.678804 | 3.458113  |
| H | -2.382016 | 5.781903  | 0.494444  | C            | 1.253886  | -5.495117 | 2.687452  |
| H | -1.929685 | 6.953263  | 1.763894  | H            | 1.542159  | -6.537378 | 2.843094  |
| H | -2.231179 | 5.249693  | 2.203366  | C            | -0.002970 | -5.173196 | 2.171199  |
| C | 1.355445  | 4.341794  | 0.581840  | H            | -0.714564 | -5.973529 | 1.935743  |
| C | 3.504379  | 5.310100  | 0.605093  | C            | -0.389022 | -3.850904 | 1.958777  |
| H | 3.952569  | 4.548646  | 1.264398  | C            | -1.770940 | -3.498619 | 1.489234  |
| H | 3.939811  | 6.284855  | 0.848907  | H            | -2.004104 | -2.508856 | 1.920585  |
| H | 3.748096  | 5.068566  | -0.442884 | H            | -2.497680 | -4.208215 | 1.913098  |
| C | 1.844460  | 3.106271  | 0.174658  | C            | -2.003150 | -3.431684 | 0.002574  |
| H | 2.918580  | 2.969789  | 0.068200  | C            | -3.050461 | -4.183095 | -0.549996 |
| C | 0.989388  | 2.005820  | -0.020898 | H            | -3.641293 | -4.819943 | 0.116474  |
| C | 4.726824  | 0.920349  | -0.901792 | C            | -3.356352 | -4.140730 | -1.909089 |
| C | 5.910279  | 1.845925  | -0.947803 | H            | -4.174323 | -4.749992 | -2.302485 |
| H | 6.607881  | 1.594793  | -0.139749 | C            | -2.609451 | -3.329542 | -2.759241 |
| H | 5.589116  | 2.888138  | -0.823166 | H            | -2.826871 | -3.291333 | -3.829342 |
| H | 6.434510  | 1.750794  | -1.906337 | C            | -1.561566 | -2.580435 | -2.232741 |
| C | 4.181237  | -1.370616 | -0.926348 | H            | -0.938796 | -1.989528 | -2.911661 |
| C | 4.772292  | -2.712357 | -1.246936 | C            | -1.257129 | -2.597760 | -0.863069 |
| H | 4.010051  | -3.493722 | -1.146518 | C            | 0.658776  | -2.576332 | -0.762979 |
| H | 5.601735  | -2.933969 | -0.564889 | O            | 1.298354  | -3.496892 | -1.077447 |
| H | 5.151154  | -2.714023 | -2.276282 |              |           |           |           |
| C | 3.644065  | -1.268041 | 0.497710  | <b>6(L1)</b> |           |           |           |
| H | 2.854944  | -2.012969 | 0.673371  | P            | -1.347847 | 0.784465  | -0.112073 |
| H | 4.467890  | -1.485712 | 1.195896  | P            | 1.645527  | 0.158457  | -0.318095 |
| C | 3.126879  | 0.138148  | 0.764811  | O            | -5.021710 | 1.653529  | -0.372600 |
| C | 2.794892  | 0.407348  | 2.208485  | O            | -3.320062 | 2.291822  | 1.105665  |
| H | 1.921251  | -0.191099 | 2.507481  | O            | -3.519304 | 0.357920  | -1.611806 |
| H | 2.560762  | 1.470126  | 2.362652  | O            | 0.092008  | 5.657532  | 1.364910  |
| H | 3.654443  | 0.158230  | 2.848335  | O            | 2.615751  | 5.158988  | 0.969622  |
| C | 2.579338  | 0.166150  | -1.936299 | O            | 4.252372  | 0.680650  | 0.395587  |

|   |           |           |           |    |           |           |           |
|---|-----------|-----------|-----------|----|-----------|-----------|-----------|
| O | 5.185241  | -0.841925 | -1.110200 | C  | 4.816680  | 0.507619  | -0.900973 |
| O | 3.071284  | -1.389987 | -1.937206 | C  | 6.073869  | 1.330599  | -0.932131 |
| C | -2.734184 | 0.981091  | 1.167912  | H  | 6.755702  | 0.997177  | -0.140480 |
| C | -2.191145 | 0.804167  | 2.561650  | H  | 5.844923  | 2.392087  | -0.773328 |
| H | -1.622151 | -0.134810 | 2.639017  | H  | 6.579240  | 1.220448  | -1.899082 |
| H | -3.010777 | 0.800863  | 3.295071  | C  | 4.083425  | -1.728107 | -0.983899 |
| H | -1.507760 | 1.625827  | 2.819507  | C  | 4.559805  | -3.104536 | -1.346280 |
| C | -3.805190 | -0.027920 | 0.785196  | H  | 3.736791  | -3.824715 | -1.269674 |
| H | -4.581618 | -0.027964 | 1.566475  | H  | 5.367686  | -3.416530 | -0.673713 |
| H | -3.391202 | -1.039473 | 0.717524  | H  | 4.937353  | -3.105949 | -2.376041 |
| C | -4.460385 | 0.358128  | -0.536833 | C  | 3.555404  | -1.622050 | 0.443549  |
| C | -5.563028 | -0.573621 | -0.946063 | H  | 2.700825  | -2.296599 | 0.600823  |
| H | -6.007884 | -0.232661 | -1.888891 | H  | 4.355102  | -1.936170 | 1.132972  |
| H | -6.344218 | -0.600966 | -0.177007 | C  | 3.164555  | -0.185915 | 0.757855  |
| H | -5.163704 | -1.585897 | -1.087961 | C  | 2.874253  | 0.070957  | 2.212344  |
| C | -4.035136 | 2.624897  | -0.084207 | H  | 1.975234  | -0.484522 | 2.515609  |
| C | -4.745551 | 3.918594  | 0.199648  | H  | 2.700580  | 1.141444  | 2.390952  |
| H | -5.339822 | 4.227048  | -0.668880 | H  | 3.732539  | -0.238062 | 2.827081  |
| H | -4.024990 | 4.712500  | 0.433698  | C  | 2.609609  | -0.036694 | -1.942114 |
| H | -5.418018 | 3.790769  | 1.056489  | C  | 3.809606  | 0.894684  | -1.981185 |
| C | -3.092616 | 2.692151  | -1.279988 | H  | 3.501088  | 1.945680  | -1.878110 |
| H | -3.684833 | 2.978696  | -2.163918 | H  | 4.299388  | 0.792476  | -2.962850 |
| H | -2.321373 | 3.462727  | -1.144015 | C  | 1.720084  | 0.106283  | -3.147867 |
| C | -2.474298 | 1.327661  | -1.550136 | H  | 2.294230  | -0.102237 | -4.062148 |
| C | -1.741812 | 1.297585  | -2.865407 | H  | 1.316745  | 1.125799  | -3.219393 |
| H | -1.266886 | 0.324258  | -3.040624 | H  | 0.882417  | -0.604956 | -3.102740 |
| H | -0.964739 | 2.074857  | -2.885124 | Ni | -0.174894 | -1.170709 | -0.221422 |
| H | -2.441820 | 1.492463  | -3.690965 | O  | 0.141997  | -1.573579 | 1.845258  |
| C | -0.172468 | 2.153074  | 0.215037  | C  | 0.271064  | -2.830166 | 2.181306  |
| C | -0.551738 | 3.430017  | 0.672489  | C  | 1.480622  | -3.359282 | 2.707422  |
| H | -1.600191 | 3.626342  | 0.885411  | H  | 2.319880  | -2.676699 | 2.867312  |
| C | 0.387018  | 4.426935  | 0.915621  | C  | 1.615618  | -4.708395 | 3.022959  |
| C | -1.263774 | 5.982030  | 1.564372  | H  | 2.569854  | -5.074362 | 3.415968  |
| H | -1.834770 | 5.925190  | 0.623084  | C  | 0.550761  | -5.593581 | 2.847213  |
| H | -1.289134 | 7.014858  | 1.927252  | H  | 0.656195  | -6.653660 | 3.089811  |
| H | -1.739820 | 5.331387  | 2.315968  | C  | -0.664413 | -5.088128 | 2.378242  |
| C | 1.764416  | 4.156819  | 0.698604  | H  | -1.524217 | -5.759797 | 2.268542  |
| C | 3.992816  | 4.919384  | 0.797112  | C  | -0.824813 | -3.739360 | 2.064758  |
| H | 4.349419  | 4.086300  | 1.425217  | C  | -2.151297 | -3.177453 | 1.645506  |
| H | 4.511945  | 5.834926  | 1.099891  | H  | -2.201006 | -2.144730 | 2.029262  |
| H | 4.239583  | 4.706563  | -0.256235 | H  | -2.960224 | -3.741145 | 2.134736  |
| C | 2.144420  | 2.894737  | 0.259157  | C  | -2.423820 | -3.153880 | 0.162304  |
| H | 3.202792  | 2.662261  | 0.161600  | C  | -3.449000 | -3.973757 | -0.338373 |
| C | 1.193821  | 1.884467  | 0.019814  | H  | -3.992965 | -4.613336 | 0.365232  |

|                 |           |           |           |   |           |           |           |
|-----------------|-----------|-----------|-----------|---|-----------|-----------|-----------|
| C               | -3.785342 | -3.995383 | -1.689788 | H | 0.312286  | 1.347385  | 3.038973  |
| H               | -4.581126 | -4.654496 | -2.046849 | H | -1.397786 | 1.848594  | 2.901575  |
| C               | -3.094296 | -3.173416 | -2.575216 | H | -0.214337 | 2.913112  | 3.703647  |
| H               | -3.335231 | -3.173788 | -3.641648 | C | -1.911808 | 1.264664  | -0.264114 |
| C               | -2.073838 | -2.354629 | -2.092638 | C | -2.834681 | 2.230943  | -0.710878 |
| H               | -1.520476 | -1.737725 | -2.807410 | H | -2.508668 | 3.262516  | -0.824929 |
| C               | -1.730409 | -2.317419 | -0.735054 | C | -4.132508 | 1.891258  | -1.076930 |
| C               | 0.578882  | -2.562053 | -1.020912 | C | -4.692771 | 4.117234  | -1.617325 |
| O               | 0.997949  | -3.561512 | -1.409369 | H | -4.422771 | 4.536616  | -0.633628 |
|                 |           |           |           | H | -5.570063 | 4.653171  | -1.995629 |
|                 |           |           |           | H | -3.854415 | 4.276490  | -2.315821 |
| <b>7-ts(L1)</b> |           |           |           | C | -4.541457 | 0.535335  | -1.004984 |
| P               | -0.149347 | 1.620182  | 0.123081  | C | -6.258651 | -1.051989 | -1.302532 |
| P               | -1.035641 | -1.322715 | 0.236226  | H | -5.677744 | -1.729901 | -1.949625 |
| O               | 0.956839  | 5.234687  | 0.388886  | H | -7.300168 | -1.050954 | -1.641637 |
| O               | -0.456352 | 4.107663  | -1.089885 | H | -6.225573 | -1.430468 | -0.267162 |
| O               | 1.318595  | 3.277080  | 1.619244  | C | -3.632223 | -0.425132 | -0.577208 |
| O               | -5.055703 | 2.761586  | -1.524113 | H | -3.925892 | -1.473267 | -0.579694 |
| O               | -5.805834 | 0.277866  | -1.384165 | C | -2.317961 | -0.085768 | -0.203499 |
| O               | -2.740617 | -3.347276 | -0.599642 | C | -3.014679 | -3.869858 | 0.700056  |
| O               | -2.073302 | -4.863541 | 1.055073  | C | -4.360814 | -4.533027 | 0.608464  |
| O               | -0.617320 | -3.288268 | 1.981917  | H | -4.333879 | -5.318956 | -0.156114 |
| C               | 0.367457  | 2.930955  | -1.144478 | H | -5.132877 | -3.802174 | 0.334386  |
| C               | 0.254249  | 2.395007  | -2.549488 | H | -4.631299 | -4.986959 | 1.569562  |
| H               | 0.844487  | 1.474139  | -2.662749 | C | -0.738646 | -4.360275 | 1.052569  |
| H               | 0.622594  | 3.135905  | -3.274074 | C | 0.170129  | -5.447586 | 1.546407  |
| H               | -0.788798 | 2.159839  | -2.804572 | H | 1.204034  | -5.082142 | 1.553082  |
| C               | 1.789275  | 3.326160  | -0.766011 | H | 0.101982  | -6.329057 | 0.897284  |
| H               | 2.203930  | 3.978891  | -1.551075 | H | -0.113046 | -5.737018 | 2.565787  |
| H               | 2.432471  | 2.439424  | -0.680287 | C | -0.423062 | -3.916978 | -0.371074 |
| C               | 1.790022  | 4.092210  | 0.552575  | H | 0.613510  | -3.564783 | -0.441770 |
| C               | 3.149292  | 4.581308  | 0.962434  | H | -0.531287 | -4.792581 | -1.031361 |
| H               | 3.072149  | 5.139681  | 1.903407  | C | -1.409128 | -2.849755 | -0.822428 |
| H               | 3.568712  | 5.242393  | 0.194392  | C | -1.297212 | -2.529993 | -2.291136 |
| H               | 3.824345  | 3.729801  | 1.113355  | H | -0.285936 | -2.165503 | -2.521983 |
| C               | -0.384808 | 4.877683  | 0.107018  | H | -2.022205 | -1.760905 | -2.594528 |
| C               | -1.143618 | 6.147167  | -0.159758 | H | -1.487740 | -3.431387 | -2.892051 |
| H               | -1.104002 | 6.808429  | 0.714319  | C | -1.539602 | -2.206301 | 1.840241  |
| H               | -2.194875 | 5.928082  | -0.386924 | C | -2.948351 | -2.768691 | 1.754792  |
| H               | -0.701208 | 6.670820  | -1.015836 | H | -3.684632 | -1.977047 | 1.553062  |
| C               | -0.914193 | 4.092840  | 1.305184  | H | -3.207633 | -3.214832 | 2.729012  |
| H               | -0.861672 | 4.750620  | 2.188267  | C | -1.338587 | -1.304663 | 3.028374  |
| H               | -1.969426 | 3.816089  | 1.170094  | H | -1.510365 | -1.857373 | 3.963742  |
| C               | -0.053790 | 2.868774  | 1.560369  | H | -2.037052 | -0.456617 | 2.992707  |
| C               | -0.357710 | 2.203012  | 2.875609  |   |           |           |           |

|              |           |           |           |   |           |           |           |
|--------------|-----------|-----------|-----------|---|-----------|-----------|-----------|
| H            | -0.312204 | -0.909532 | 3.042521  | H | -1.808917 | -0.960723 | 2.778251  |
| Ni           | 0.864665  | -0.327438 | 0.311354  | H | -3.451398 | -0.485645 | 3.276424  |
| O            | 2.207993  | -1.822074 | -1.186047 | H | -2.266501 | 0.760413  | 2.820651  |
| C            | 3.435548  | -2.111156 | -1.718135 | C | -3.614287 | -1.748429 | 0.805269  |
| C            | 3.769656  | -3.407314 | -2.105341 | H | -4.342245 | -2.055191 | 1.573340  |
| H            | 3.043799  | -4.209205 | -1.952537 | H | -2.800966 | -2.487221 | 0.789007  |
| C            | 5.020749  | -3.652497 | -2.671882 | C | -4.323624 | -1.721894 | -0.544302 |
| H            | 5.289978  | -4.668225 | -2.972697 | C | -4.928316 | -3.039946 | -0.931219 |
| C            | 5.928600  | -2.608335 | -2.844727 | H | -5.417889 | -2.949460 | -1.908500 |
| H            | 6.908542  | -2.800915 | -3.288010 | H | -5.676154 | -3.346119 | -0.189730 |
| C            | 5.584961  | -1.313208 | -2.451598 | H | -4.149536 | -3.809564 | -0.991477 |
| H            | 6.296298  | -0.492624 | -2.587334 | C | -4.912856 | 0.528920  | -0.208828 |
| C            | 4.337412  | -1.048544 | -1.885211 | C | -6.110242 | 1.416930  | -0.015370 |
| C            | 3.901837  | 0.313901  | -1.418122 | H | -6.736928 | 1.415848  | -0.915309 |
| H            | 2.902023  | 0.522819  | -1.837992 | H | -5.795330 | 2.447930  | 0.191916  |
| H            | 4.588408  | 1.079789  | -1.806991 | H | -6.708928 | 1.055484  | 0.829607  |
| C            | 3.829970  | 0.410188  | 0.085247  | C | -4.033903 | 0.943182  | -1.386190 |
| C            | 4.830836  | 1.102938  | 0.779062  | H | -4.656939 | 0.918714  | -2.294957 |
| H            | 5.642065  | 1.569970  | 0.210577  | H | -3.667548 | 1.973106  | -1.270596 |
| C            | 4.804934  | 1.223404  | 2.166770  | C | -2.887684 | -0.039296 | -1.558021 |
| H            | 5.590242  | 1.784622  | 2.679791  | C | -2.124267 | 0.149486  | -2.841403 |
| C            | 3.786762  | 0.607863  | 2.899038  | H | -1.310986 | -0.587098 | -2.924013 |
| H            | 3.769459  | 0.680528  | 3.989311  | H | -1.687636 | 1.157173  | -2.884413 |
| C            | 2.821631  | -0.131678 | 2.230665  | H | -2.792545 | 0.024736  | -3.706151 |
| H            | 2.082882  | -0.705013 | 2.801290  | C | -1.271366 | 1.795964  | 0.246338  |
| C            | 2.790170  | -0.208027 | 0.821745  | C | -2.187729 | 2.766582  | 0.696539  |
| C            | 2.119174  | -1.732497 | 0.281222  | H | -3.223315 | 2.476964  | 0.857190  |
| O            | 2.420592  | -2.711905 | 0.931662  | C | -1.795682 | 4.067887  | 0.986092  |
|              |           |           |           | C | -3.984917 | 4.725366  | 1.565692  |
| <b>8(L1)</b> |           |           |           | H | -4.438364 | 4.439405  | 0.601961  |
| Ni           | 0.166318  | -1.107242 | -0.405199 | H | -4.478960 | 5.633276  | 1.928062  |
| P            | -1.702545 | 0.039499  | -0.065268 | H | -4.156003 | 3.915495  | 2.294034  |
| P            | 1.247284  | 0.817545  | -0.372203 | C | -0.432334 | 4.429145  | 0.835774  |
| O            | -5.385068 | -0.777276 | -0.463646 | C | 1.223876  | 6.098113  | 1.023709  |
| O            | -4.188211 | 0.567015  | 1.020699  | H | 1.895945  | 5.512569  | 1.672571  |
| O            | -3.421254 | -1.364378 | -1.587219 | H | 1.268332  | 7.148514  | 1.330655  |
| O            | -2.619210 | 5.035273  | 1.425683  | H | 1.573783  | 6.021996  | -0.019441 |
| O            | -0.118885 | 5.696785  | 1.153607  | C | 0.477589  | 3.473464  | 0.399271  |
| O            | 3.315004  | 2.423189  | 0.523809  | H | 1.531266  | 3.735696  | 0.351956  |
| O            | 4.860378  | 1.714183  | -1.084556 | C | 0.083102  | 2.156301  | 0.093493  |
| O            | 3.252580  | 0.325590  | -2.063539 | C | 3.889434  | 2.688969  | -0.757832 |
| O            | 2.333816  | -3.127734 | -0.496229 | C | 4.598743  | 4.008285  | -0.636619 |
| C            | -3.099424 | -0.359831 | 1.160599  | H | 5.354219  | 3.952155  | 0.156503  |
| C            | -2.626568 | -0.252095 | 2.587924  | H | 3.889710  | 4.809347  | -0.391528 |

|   |           |           |           |                 |           |           |           |
|---|-----------|-----------|-----------|-----------------|-----------|-----------|-----------|
| H | 5.099059  | 4.259235  | -1.579716 | C               | -0.590339 | -2.896992 | -0.363735 |
| C | 4.306675  | 0.403258  | -1.112856 | C               | 1.490751  | -2.213222 | -1.176283 |
| C | 5.365721  | -0.546117 | -1.593726 | O               | 1.578415  | -2.272657 | -2.376523 |
| H | 4.928941  | -1.544678 | -1.720307 |                 |           |           |           |
| H | 6.196291  | -0.601673 | -0.879425 |                 |           |           |           |
| H | 5.752239  | -0.211279 | -2.563848 | <b>9-ts(L1)</b> |           |           |           |
| C | 3.805799  | 0.088922  | 0.290162  | Ni              | 0.730860  | -0.698011 | 0.408604  |
| H | 3.387541  | -0.922714 | 0.319184  | P               | 0.534291  | 1.504048  | 0.086622  |
| H | 4.659179  | 0.119003  | 0.986865  | P               | -1.475944 | -0.814782 | 0.276063  |
| C | 2.770566  | 1.110727  | 0.726163  | O               | 2.936819  | 4.411817  | 0.416966  |
| C | 2.416463  | 1.001820  | 2.187167  | O               | 1.215489  | 3.912589  | -1.085759 |
| H | 2.025891  | -0.001433 | 2.411617  | O               | 2.508879  | 2.452375  | 1.620885  |
| H | 1.659542  | 1.743987  | 2.478937  | O               | -3.496574 | 4.522302  | -1.523642 |
| H | 3.310634  | 1.165054  | 2.806256  | O               | -5.219752 | 2.599614  | -1.212817 |
| C | 2.201166  | 1.285356  | -1.955144 | O               | -3.836174 | -1.902142 | -0.604059 |
| C | 2.820716  | 2.668400  | -1.847712 | O               | -3.885898 | -3.643326 | 0.962698  |
| H | 2.057093  | 3.440614  | -1.678454 | O               | -1.881720 | -2.886831 | 1.902415  |
| H | 3.311003  | 2.901269  | -2.806876 | O               | 0.988971  | -2.670995 | -1.188271 |
| C | 1.337514  | 1.116954  | -3.176776 | C               | 1.544332  | 2.517121  | -1.165192 |
| H | 1.927523  | 1.320373  | -4.082527 | C               | 1.251359  | 2.091937  | -2.581179 |
| H | 0.492414  | 1.819493  | -3.154293 | H               | 1.480827  | 1.027661  | -2.726989 |
| H | 0.958497  | 0.088174  | -3.241737 | H               | 1.863409  | 2.676499  | -3.282941 |
| C | 2.705044  | -3.153858 | 0.817879  | H               | 0.194384  | 2.251377  | -2.837170 |
| C | 4.078600  | -3.398553 | 0.991562  | C               | 3.001258  | 2.348161  | -0.764595 |
| H | 4.679098  | -3.525605 | 0.087951  | H               | 3.635681  | 2.818080  | -1.532869 |
| C | 4.657620  | -3.466767 | 2.249683  | H               | 3.272217  | 1.288181  | -0.697894 |
| H | 5.729522  | -3.655691 | 2.346886  | C               | 3.272223  | 3.037339  | 0.568666  |
| C | 3.857386  | -3.291898 | 3.378662  | C               | 4.707697  | 2.957397  | 0.997880  |
| H | 4.287171  | -3.337997 | 4.381865  | H               | 4.842677  | 3.492588  | 1.945662  |
| C | 2.493630  | -3.085642 | 3.211424  | H               | 5.361131  | 3.408203  | 0.241294  |
| H | 1.856712  | -2.981641 | 4.095680  | H               | 4.994742  | 1.908212  | 1.140335  |
| C | 1.871156  | -3.020048 | 1.951534  | C               | 1.568083  | 4.594400  | 0.119966  |
| C | 0.376869  | -2.810539 | 1.931821  | C               | 1.356392  | 6.057863  | -0.146860 |
| H | 0.160541  | -1.726764 | 1.815808  | H               | 1.634440  | 6.650204  | 0.733190  |
| H | -0.003493 | -3.075810 | 2.932047  | H               | 0.305666  | 6.260292  | -0.389101 |
| C | -0.387507 | -3.547547 | 0.866653  | H               | 1.979026  | 6.372780  | -0.992968 |
| C | -0.869873 | -4.844070 | 1.075354  | C               | 0.761975  | 4.059655  | 1.298926  |
| H | -0.712145 | -5.332240 | 2.043784  | H               | 1.049558  | 4.632709  | 2.195165  |
| C | -1.538054 | -5.518928 | 0.053267  | H               | -0.316680 | 4.208405  | 1.150672  |
| H | -1.912131 | -6.533195 | 0.216749  | C               | 1.091343  | 2.596254  | 1.544220  |
| C | -1.704343 | -4.896343 | -1.185309 | C               | 0.518683  | 2.085029  | 2.839610  |
| H | -2.208337 | -5.425959 | -1.999672 | H               | 0.744399  | 1.018578  | 2.974550  |
| C | -1.225947 | -3.601174 | -1.391950 | H               | -0.572373 | 2.219676  | 2.856735  |
| H | -1.352412 | -3.136180 | -2.374395 | H               | 0.947176  | 2.638126  | 3.688135  |
|   |           |           |           | C               | -1.221511 | 1.880827  | -0.282566 |

|   |           |           |           |               |           |           |           |
|---|-----------|-----------|-----------|---------------|-----------|-----------|-----------|
| C | -1.672524 | 3.132499  | -0.746467 | C             | 3.072373  | -5.312931 | -2.612980 |
| H | -0.950253 | 3.928402  | -0.909862 | H             | 2.999547  | -6.373322 | -2.871932 |
| C | -3.007900 | 3.361712  | -1.056901 | C             | 4.255592  | -4.615111 | -2.852370 |
| C | -2.605950 | 5.600334  | -1.685601 | H             | 5.114148  | -5.116511 | -3.305810 |
| H | -2.175438 | 5.917328  | -0.721256 | C             | 4.333175  | -3.263869 | -2.504834 |
| H | -3.189836 | 6.430801  | -2.096541 | H             | 5.260655  | -2.710488 | -2.689638 |
| H | -1.787566 | 5.363818  | -2.385554 | C             | 3.253107  | -2.597142 | -1.926445 |
| C | -3.947458 | 2.311305  | -0.893577 | C             | 3.334632  | -1.155421 | -1.500909 |
| C | -6.187053 | 1.588948  | -1.054896 | H             | 2.362575  | -0.674797 | -1.704609 |
| H | -5.979273 | 0.713675  | -1.692205 | H             | 4.098582  | -0.639236 | -2.105900 |
| H | -7.146393 | 2.022077  | -1.357488 | C             | 3.648224  | -0.987264 | -0.031154 |
| H | -6.264455 | 1.259830  | -0.005264 | C             | 4.984168  | -1.067644 | 0.391043  |
| C | -3.506071 | 1.072424  | -0.445475 | H             | 5.768686  | -1.217735 | -0.358973 |
| H | -4.216034 | 0.251636  | -0.389940 | C             | 5.325534  | -0.978215 | 1.737409  |
| C | -2.151986 | 0.833254  | -0.139293 | H             | 6.372288  | -1.047515 | 2.045217  |
| C | -4.310669 | -2.325681 | 0.675425  | C             | 4.316664  | -0.815338 | 2.687200  |
| C | -5.810614 | -2.341129 | 0.581594  | H             | 4.563449  | -0.759890 | 3.751329  |
| H | -6.125337 | -3.013902 | -0.225281 | C             | 2.987059  | -0.735109 | 2.276182  |
| H | -6.194808 | -1.334873 | 0.370094  | H             | 2.212449  | -0.634941 | 3.044850  |
| H | -6.248193 | -2.693673 | 1.523287  | C             | 2.627464  | -0.783384 | 0.920645  |
| C | -2.467252 | -3.764915 | 0.939848  | C             | 0.989102  | -2.495478 | 0.632783  |
| C | -2.119512 | -5.159582 | 1.370723  | O             | 1.193142  | -3.494078 | 1.195635  |
| H | -1.030960 | -5.291989 | 1.374344  |               |           |           |           |
| H | -2.564883 | -5.890254 | 0.684965  | CO            |           |           |           |
| H | -2.502357 | -5.344285 | 2.381799  | C             | 0.000000  | 0.000000  | -0.647058 |
| C | -1.998854 | -3.429255 | -0.468070 | O             | 0.000000  | 0.000000  | 0.485293  |
| H | -0.914155 | -3.549514 | -0.579552 |               |           |           |           |
| H | -2.485676 | -4.128898 | -1.166445 | <b>10(L1)</b> |           |           |           |
| C | -2.423954 | -2.020839 | -0.843461 | P             | -1.507286 | 0.447738  | -0.150325 |
| C | -2.180292 | -1.702970 | -2.295442 | P             | 1.594482  | 0.418233  | -0.416936 |
| H | -1.108736 | -1.803635 | -2.519411 | O             | -5.220838 | 1.038286  | -0.879558 |
| H | -2.502868 | -0.683179 | -2.549810 | O             | -3.775237 | 1.729034  | 0.819128  |
| H | -2.737641 | -2.404150 | -2.933125 | O             | -3.480625 | -0.135151 | -1.910850 |
| C | -2.266780 | -1.512147 | 1.855898  | O             | -0.943260 | 5.226169  | 2.062134  |
| C | -3.780611 | -1.422171 | 1.787378  | O             | 1.650694  | 5.142217  | 1.895683  |
| H | -4.113494 | -0.381742 | 1.660698  | O             | 4.049429  | 1.199747  | 0.576584  |
| H | -4.195333 | -1.783229 | 2.742369  | O             | 5.290125  | 0.356615  | -1.228663 |
| C | -1.681325 | -0.867009 | 3.083765  | O             | 3.324055  | -0.345213 | -2.291950 |
| H | -2.095996 | -1.330198 | 3.990939  | C             | -3.101951 | 0.463905  | 0.932948  |
| H | -1.907473 | 0.207969  | 3.109129  | C             | -2.794223 | 0.298205  | 2.398606  |
| H | -0.589314 | -1.000375 | 3.099750  | H             | -2.398161 | -0.702146 | 2.604769  |
| C | 2.042161  | -3.301681 | -1.698361 | H             | -3.718960 | 0.426807  | 2.978960  |
| C | 1.979021  | -4.665538 | -2.041784 | H             | -2.065035 | 1.039557  | 2.754864  |
| H | 1.045259  | -5.203879 | -1.854046 | C             | -4.054239 | -0.597818 | 0.400960  |

|   |           |           |           |    |           |           |           |
|---|-----------|-----------|-----------|----|-----------|-----------|-----------|
| H | -4.918569 | -0.647251 | 1.082392  | H  | 5.963910  | -2.176301 | -1.479884 |
| H | -3.591162 | -1.589772 | 0.375435  | H  | 5.504571  | -1.490053 | -3.060533 |
| C | -4.560349 | -0.216428 | -0.982455 | C  | 3.839777  | -1.111768 | -0.042078 |
| C | -5.547349 | -1.192023 | -1.554641 | H  | 3.127171  | -1.944150 | -0.123100 |
| H | -5.885699 | -0.842706 | -2.537674 | H  | 4.682082  | -1.426215 | 0.594941  |
| H | -6.418529 | -1.282690 | -0.894748 | C  | 3.154652  | 0.075690  | 0.614390  |
| H | -5.083279 | -2.179042 | -1.666260 | C  | 2.805644  | -0.151047 | 2.061772  |
| C | -4.349259 | 2.059819  | -0.444516 | H  | 2.114754  | -0.998118 | 2.156312  |
| C | -5.172713 | 3.296778  | -0.219513 | H  | 2.339284  | 0.739597  | 2.506614  |
| H | -5.669639 | 3.599843  | -1.148730 | H  | 3.716213  | -0.378732 | 2.634267  |
| H | -4.539080 | 4.122943  | 0.126906  | C  | 2.614537  | 0.851384  | -1.973173 |
| H | -5.939284 | 3.098863  | 0.539463  | C  | 3.611557  | 1.963703  | -1.682270 |
| C | -3.264750 | 2.225867  | -1.499026 | H  | 3.101294  | 2.874651  | -1.338766 |
| H | -3.750065 | 2.512924  | -2.445824 | H  | 4.129345  | 2.215307  | -2.621702 |
| H | -2.568403 | 3.033463  | -1.230825 | C  | 1.763337  | 1.178924  | -3.169961 |
| C | -2.529094 | 0.911476  | -1.714890 | H  | 2.408995  | 1.311553  | -4.050171 |
| C | -1.678948 | 0.946525  | -2.953103 | H  | 1.210987  | 2.114964  | -3.009936 |
| H | -1.156870 | -0.008134 | -3.105118 | H  | 1.049950  | 0.377056  | -3.396831 |
| H | -0.936042 | 1.751583  | -2.886913 | Ni | -0.024910 | -1.222842 | -0.522486 |
| H | -2.311942 | 1.134722  | -3.832384 | O  | 1.287003  | -2.539112 | 0.385297  |
| C | -0.570926 | 1.947948  | 0.381282  | C  | -1.436986 | -2.547464 | -0.347692 |
| C | -1.173965 | 3.077511  | 0.971296  | C  | -2.176710 | -3.017993 | -1.438489 |
| H | -2.254871 | 3.101966  | 1.081113  | H  | -2.022169 | -2.596436 | -2.435846 |
| C | -0.424766 | 4.138872  | 1.467003  | C  | -3.145231 | -4.011547 | -1.279505 |
| C | -2.344204 | 5.327112  | 2.153228  | H  | -3.706249 | -4.364991 | -2.149441 |
| H | -2.811582 | 5.379807  | 1.156034  | C  | -3.393194 | -4.543081 | -0.015239 |
| H | -2.558346 | 6.258234  | 2.688497  | H  | -4.151606 | -5.317887 | 0.122238  |
| H | -2.788805 | 4.487847  | 2.713228  | C  | -2.656332 | -4.082859 | 1.072795  |
| C | 0.989024  | 4.096865  | 1.373697  | H  | -2.833082 | -4.504998 | 2.068277  |
| C | 3.056406  | 5.141787  | 1.810241  | C  | -1.676019 | -3.088673 | 0.930076  |
| H | 3.502785  | 4.279466  | 2.332343  | C  | -0.880169 | -2.681478 | 2.147464  |
| H | 3.401031  | 6.061499  | 2.294535  | H  | -0.551725 | -1.632473 | 2.032000  |
| H | 3.399304  | 5.145698  | 0.762281  | H  | -1.512752 | -2.736277 | 3.047141  |
| C | 1.590544  | 2.996196  | 0.776277  | C  | 0.319097  | -3.562731 | 2.312249  |
| H | 2.676002  | 2.935737  | 0.749985  | C  | 0.434053  | -4.508480 | 3.329487  |
| C | 0.834078  | 1.918484  | 0.276421  | H  | -0.367219 | -4.580574 | 4.074252  |
| C | 4.657390  | 1.496646  | -0.679796 | C  | 1.541502  | -5.356472 | 3.417759  |
| C | 5.725996  | 2.516546  | -0.402128 | H  | 1.619084  | -6.087683 | 4.225610  |
| H | 6.447368  | 2.110619  | 0.317248  | C  | 2.541968  | -5.252026 | 2.448182  |
| H | 5.288881  | 3.431407  | 0.017560  | H  | 3.414181  | -5.912014 | 2.491603  |
| H | 6.258367  | 2.772880  | -1.325900 | C  | 2.443776  | -4.322861 | 1.417699  |
| C | 4.384538  | -0.724926 | -1.404608 | H  | 3.224248  | -4.256584 | 0.653647  |
| C | 5.120791  | -1.837195 | -2.093478 | C  | 1.335815  | -3.440297 | 1.322251  |
| H | 4.444542  | -2.683974 | -2.265199 | C  | 0.520054  | -1.929653 | -2.164289 |



|                  |           |           |           |    |           |           |           |
|------------------|-----------|-----------|-----------|----|-----------|-----------|-----------|
| O                | 0.913073  | -2.578881 | -3.024003 | H  | 3.290775  | 5.032537  | -1.234102 |
|                  |           |           |           | H  | 3.094528  | 5.914068  | -2.774229 |
| <b>11-ts(L1)</b> |           |           |           | H  | 3.163427  | 4.128818  | -2.776941 |
| P                | 1.588368  | 0.296251  | 0.211123  | C  | -0.611080 | 4.091814  | -1.377729 |
| P                | -1.493310 | 0.505163  | 0.502431  | C  | -2.585475 | 5.302300  | -1.816243 |
| O                | 5.330136  | 0.427817  | 0.953340  | H  | -3.113077 | 4.472526  | -2.315237 |
| O                | 4.027012  | 1.288216  | -0.784226 | H  | -2.856809 | 6.239837  | -2.313270 |
| O                | 3.438597  | -0.426025 | 2.029643  | H  | -2.914708 | 5.353351  | -0.764684 |
| O                | 1.402318  | 5.039210  | -2.112904 | C  | -1.299789 | 3.059846  | -0.750047 |
| O                | -1.187399 | 5.180066  | -1.918836 | H  | -2.387357 | 3.091317  | -0.713606 |
| O                | -3.935708 | 1.404619  | -0.513863 | C  | -0.631131 | 1.937574  | -0.225189 |
| O                | -5.192942 | 0.640589  | 1.304594  | C  | -4.520297 | 1.751154  | 0.736346  |
| O                | -3.261665 | -0.096387 | 2.402607  | C  | -5.553040 | 2.803619  | 0.444809  |
| C                | 3.168521  | 0.135958  | -0.860494 | H  | -6.295035 | 2.408154  | -0.259444 |
| C                | 2.867406  | -0.029795 | -2.328448 | H  | -5.083360 | 3.689874  | -0.000840 |
| H                | 2.409857  | -1.004452 | -2.525003 | H  | -6.066927 | 3.101789  | 1.366551  |
| H                | 3.809539  | 0.019554  | -2.893451 | C  | -4.321916 | -0.461582 | 1.520574  |
| H                | 2.201024  | 0.757652  | -2.709481 | C  | -5.105517 | -1.531940 | 2.224979  |
| C                | 3.917285  | -1.052494 | -0.269400 | H  | -4.465463 | -2.401369 | 2.420015  |
| H                | 4.752719  | -1.319190 | -0.936999 | H  | -5.958774 | -1.847399 | 1.612672  |
| H                | 3.261993  | -1.928800 | -0.186717 | H  | -5.479868 | -1.148767 | 3.182047  |
| C                | 4.482907  | -0.704496 | 1.101444  | C  | -3.782079 | -0.901085 | 0.164926  |
| C                | 5.302975  | -1.808770 | 1.704514  | H  | -3.094801 | -1.748888 | 0.294386  |
| H                | 5.699051  | -1.487628 | 2.675692  | H  | -4.625515 | -1.236476 | -0.460012 |
| H                | 6.143022  | -2.064272 | 1.047407  | C  | -3.072424 | 0.258942  | -0.523413 |
| H                | 4.682303  | -2.700904 | 1.851855  | C  | -2.755239 | -0.008176 | -1.970276 |
| C                | 4.626592  | 1.560462  | 0.475926  | H  | -2.120416 | -0.896555 | -2.068407 |
| C                | 5.636561  | 2.649033  | 0.242347  | H  | -2.239835 | 0.845585  | -2.433175 |
| H                | 6.166753  | 2.882899  | 1.173367  | H  | -3.684008 | -0.192851 | -2.530214 |
| H                | 5.145832  | 3.560115  | -0.122278 | C  | -2.496488 | 1.057965  | 2.036351  |
| H                | 6.368569  | 2.319343  | -0.505006 | C  | -3.450929 | 2.198806  | 1.721091  |
| C                | 3.562550  | 1.918053  | 1.499774  | H  | -2.907884 | 3.079260  | 1.348761  |
| H                | 4.068262  | 2.178219  | 2.443717  | H  | -3.952016 | 2.498356  | 2.655863  |
| H                | 2.990103  | 2.801975  | 1.181806  | C  | -1.625265 | 1.388373  | 3.217249  |
| C                | 2.643726  | 0.733369  | 1.760483  | H  | -2.257923 | 1.597631  | 4.092278  |
| C                | 1.806868  | 0.971477  | 2.985459  | H  | -1.019879 | 2.282366  | 3.014247  |
| H                | 1.207238  | 0.090603  | 3.239518  | H  | -0.960741 | 0.557022  | 3.477205  |
| H                | 1.140766  | 1.831596  | 2.838050  | Ni | -0.002559 | -1.245775 | 0.664712  |
| H                | 2.460463  | 1.188131  | 3.843169  | O  | -0.926280 | -2.982258 | -0.007809 |
| C                | 0.772047  | 1.850350  | -0.342416 | C  | 0.864784  | -2.964883 | -0.094313 |
| C                | 1.465133  | 2.905414  | -0.967192 | C  | 1.504580  | -3.835276 | 0.810370  |
| H                | 2.545200  | 2.831154  | -1.082310 | H  | 1.178252  | -3.888521 | 1.850888  |
| C                | 0.801051  | 4.013296  | -1.484579 | C  | 2.590008  | -4.595246 | 0.384504  |
| C                | 2.804951  | 5.012709  | -2.223512 | H  | 3.111044  | -5.223711 | 1.112679  |

|               |           |           |           |   |           |           |           |
|---------------|-----------|-----------|-----------|---|-----------|-----------|-----------|
| C             | 3.012002  | -4.567656 | -0.949194 | H | 4.619976  | -3.996782 | 0.381479  |
| H             | 3.861543  | -5.170500 | -1.276590 | C | 4.607554  | 0.485913  | 0.428583  |
| C             | 2.299881  | -3.789392 | -1.863726 | C | 5.635487  | 1.582393  | 0.464247  |
| H             | 2.574028  | -3.795354 | -2.924369 | H | 6.236748  | 1.515206  | 1.378964  |
| C             | 1.215085  | -3.007681 | -1.463541 | H | 5.149636  | 2.566316  | 0.433748  |
| C             | 0.308507  | -2.316794 | -2.439914 | H | 6.302330  | 1.493999  | -0.402161 |
| H             | 0.170050  | -1.257021 | -2.133357 | C | 3.658645  | 0.502749  | 1.624119  |
| H             | 0.733202  | -2.308708 | -3.454128 | H | 4.267279  | 0.414923  | 2.539539  |
| C             | -1.003961 | -3.035522 | -2.416730 | H | 3.112725  | 1.455136  | 1.688689  |
| C             | -1.704885 | -3.423340 | -3.561044 | C | 2.703691  | -0.674468 | 1.557193  |
| H             | -1.282934 | -3.185277 | -4.542484 | C | 1.914346  | -0.863570 | 2.825134  |
| C             | -2.925644 | -4.089236 | -3.468772 | H | 1.264610  | -1.746042 | 2.749460  |
| H             | -3.467464 | -4.373274 | -4.373610 | H | 1.287651  | 0.016513  | 3.028296  |
| C             | -3.442781 | -4.399283 | -2.207924 | H | 2.590209  | -1.009286 | 3.681115  |
| H             | -4.392794 | -4.933230 | -2.120767 | C | 0.708840  | 1.052527  | 0.025827  |
| C             | -2.750536 | -4.044659 | -1.054930 | C | 1.392433  | 2.274369  | -0.120882 |
| H             | -3.136614 | -4.290409 | -0.062517 | H | 2.477230  | 2.263524  | -0.207893 |
| C             | -1.537080 | -3.340785 | -1.146546 | C | 0.717584  | 3.485185  | -0.227972 |
| C             | -0.178778 | -1.768542 | 2.401009  | C | 2.715439  | 4.721206  | -0.429829 |
| O             | -0.395829 | -2.104971 | 3.484489  | H | 3.165259  | 4.368105  | 0.513516  |
|               |           |           |           | H | 2.997684  | 5.769031  | -0.580056 |
|               |           |           |           | H | 3.120790  | 4.123802  | -1.263407 |
| <b>12(L1)</b> |           |           |           | C | -0.699819 | 3.491716  | -0.197454 |
| P             | 1.545110  | -0.589505 | 0.048900  | C | -2.690970 | 4.752152  | -0.295741 |
| P             | -1.546291 | -0.582682 | 0.058190  | H | -3.147272 | 4.176229  | -1.117919 |
| O             | 5.303568  | -0.749103 | 0.453475  | H | -2.966719 | 5.806030  | -0.412974 |
| O             | 3.902140  | 0.639452  | -0.796812 | H | -3.096301 | 4.388932  | 0.663960  |
| O             | 3.470250  | -1.875819 | 1.370013  | C | -1.381589 | 2.286533  | -0.069504 |
| O             | 1.310258  | 4.683599  | -0.382933 | H | -2.468398 | 2.288083  | -0.121635 |
| O             | -1.286217 | 4.696689  | -0.323495 | C | -0.704500 | 1.057587  | 0.047906  |
| O             | -3.891541 | 0.665841  | -0.788155 | C | -4.610611 | 0.490394  | 0.426305  |
| O             | -5.309069 | -0.743483 | 0.420170  | C | -5.637175 | 1.587681  | 0.472957  |
| O             | -3.486093 | -1.890437 | 1.332776  | H | -6.284774 | 1.528012  | -0.410289 |
| C             | 3.000671  | -0.423684 | -1.152835 | H | -5.149613 | 2.571052  | 0.485093  |
| C             | 2.515585  | -0.134717 | -2.550039 | H | -6.258473 | 1.492671  | 1.371650  |
| H             | 1.825675  | -0.923349 | -2.883094 | C | -4.433040 | -1.853536 | 0.268769  |
| H             | 3.362364  | -0.094424 | -3.251100 | C | -5.261929 | -3.100124 | 0.396011  |
| H             | 1.984282  | 0.826786  | -2.601256 | H | -4.629552 | -3.990520 | 0.294501  |
| C             | 3.748285  | -1.748353 | -1.047572 | H | -6.036115 | -3.124861 | -0.380253 |
| H             | 4.523763  | -1.793133 | -1.828902 | H | -5.748360 | -3.123698 | 1.378842  |
| H             | 3.053945  | -2.588154 | -1.200891 | C | -3.741119 | -1.717811 | -1.083724 |
| C             | 4.426820  | -1.860152 | 0.314424  | H | -3.046626 | -2.555967 | -1.245002 |
| C             | 5.252463  | -3.105373 | 0.472891  | H | -4.508424 | -1.746196 | -1.873773 |
| H             | 5.728241  | -3.111116 | 1.461192  | C | -2.989758 | -0.393294 | -1.155708 |
| H             | 6.034883  | -3.145559 | -0.294407 |   |           |           |           |

|               |           |           |           |   |           |           |           |
|---------------|-----------|-----------|-----------|---|-----------|-----------|-----------|
| C             | -2.490310 | -0.079346 | -2.542384 | P | -1.553050 | -0.250741 | 0.206973  |
| H             | -1.797730 | -0.862459 | -2.883146 | P | 1.530220  | -0.515593 | 0.386656  |
| H             | -1.958502 | 0.882775  | -2.571017 | O | -5.326027 | -0.358479 | 0.788973  |
| H             | -3.330271 | -0.025903 | -3.250669 | O | -3.905414 | -1.269719 | -0.825553 |
| C             | -2.720350 | -0.693906 | 1.552381  | O | -3.498357 | 0.633702  | 1.857929  |
| C             | -3.674787 | 0.482361  | 1.632676  | O | -1.546369 | -5.165725 | -1.776963 |
| H             | -3.129019 | 1.432635  | 1.723373  | O | 1.043059  | -5.352462 | -1.659195 |
| H             | -4.293938 | 0.376462  | 2.539131  | O | 3.864552  | -1.643904 | -0.581477 |
| C             | -1.946204 | -0.913022 | 2.825177  | O | 5.223549  | -0.882458 | 1.167676  |
| H             | -2.632812 | -1.073010 | 3.669985  | O | 3.389025  | 0.130220  | 2.211981  |
| H             | -1.316055 | -0.042309 | 3.055351  | O | 1.468628  | 2.479612  | 0.198302  |
| H             | -1.301737 | -1.798321 | 2.737766  | C | -3.082341 | -0.095421 | -0.939989 |
| Ni            | -0.004024 | -2.005175 | -0.425360 | C | -2.668488 | 0.004381  | -2.385328 |
| C             | -0.005555 | -3.039510 | -1.816437 | H | -2.104391 | 0.931261  | -2.554825 |
| O             | -0.005168 | -3.575343 | -2.854937 | H | -3.559462 | 0.024269  | -3.029189 |
| <b>P</b>      |           |           |           | H | -2.042825 | -0.844776 | -2.695002 |
| O             | -0.000002 | -1.327319 | 0.014534  | C | -3.929732 | 1.084921  | -0.488798 |
| C             | 1.183105  | -0.643244 | 0.005650  | H | -4.758141 | 1.195250  | -1.206330 |
| C             | 2.340323  | -1.426666 | -0.000402 | H | -3.362637 | 2.021471  | -0.485924 |
| H             | 2.233915  | -2.513045 | 0.002014  | C | -4.525431 | 0.813338  | 0.884652  |
| C             | 3.588006  | -0.815824 | -0.008941 | C | -5.408962 | 1.916187  | 1.389793  |
| H             | 4.490650  | -1.431050 | -0.013029 | H | -5.810755 | 1.647974  | 2.374523  |
| C             | 3.681926  | 0.577143  | -0.012832 | H | -6.245215 | 2.075859  | 0.698728  |
| H             | 4.659197  | 1.064685  | -0.020380 | H | -4.837656 | 2.848167  | 1.476285  |
| C             | 2.519822  | 1.343253  | -0.006559 | C | -4.564556 | -1.487879 | 0.422791  |
| H             | 2.587184  | 2.435400  | -0.008293 | C | -5.520021 | -2.626344 | 0.199277  |
| C             | 1.249946  | 0.754667  | 0.003861  | H | -6.091273 | -2.830093 | 1.112941  |
| C             | -0.000005 | 1.584433  | 0.020348  | H | -4.977162 | -3.535952 | -0.087040 |
| H             | -0.000057 | 2.243946  | 0.907124  | H | -6.221934 | -2.367555 | -0.602597 |
| H             | 0.000017  | 2.284065  | -0.834385 | C | -3.554340 | -1.745912 | 1.536778  |
| C             | -1.249941 | 0.754659  | 0.003719  | H | -4.115265 | -1.927294 | 2.467948  |
| C             | -2.519820 | 1.343250  | -0.006675 | H | -2.955199 | -2.645382 | 1.335476  |
| H             | -2.587176 | 2.435395  | -0.008442 | C | -2.670791 | -0.525167 | 1.738360  |
| C             | -3.681911 | 0.577142  | -0.012836 | C | -1.857144 | -0.595022 | 3.001631  |
| H             | -4.659184 | 1.064679  | -0.020412 | H | -1.209953 | 0.287495  | 3.101746  |
| C             | -3.587999 | -0.815823 | -0.008867 | H | -1.228705 | -1.495240 | 3.009814  |
| H             | -4.490650 | -1.431041 | -0.012792 | H | -2.523888 | -0.634760 | 3.875306  |
| C             | -2.340319 | -1.426666 | -0.000334 | C | -0.790787 | -1.863980 | -0.276296 |
| H             | -2.233903 | -2.513038 | 0.002223  | C | -1.521433 | -2.950721 | -0.799726 |
| C             | -1.183127 | -0.643231 | 0.005552  | H | -2.599175 | -2.863840 | -0.900448 |
| <b>13(L1)</b> |           |           |           | C | -0.901762 | -4.109849 | -1.251107 |
| Ni            | 0.043386  | 1.227806  | 0.284512  | C | -2.950995 | -5.116887 | -1.845531 |
|               |           |           |           | H | -3.403360 | -5.059652 | -0.841644 |
|               |           |           |           | H | -3.275536 | -6.047862 | -2.322441 |

|   |           |           |           |                  |           |           |           |
|---|-----------|-----------|-----------|------------------|-----------|-----------|-----------|
| H | -3.311013 | -4.267432 | -2.449410 | C                | 1.068254  | 3.730646  | -1.835510 |
| C | 0.509971  | -4.214069 | -1.186034 | C                | -0.234347 | 3.027130  | -2.086813 |
| C | 2.440938  | -5.505802 | -1.588251 | H                | -0.089811 | 1.926872  | -2.059304 |
| H | 2.973242  | -4.733403 | -2.167149 | H                | -0.618110 | 3.285654  | -3.085752 |
| H | 2.671701  | -6.486319 | -2.017971 | C                | -1.199934 | 3.414989  | -0.994866 |
| H | 2.798621  | -5.485581 | -0.545452 | C                | -2.006322 | 4.554089  | -1.108903 |
| C | 1.237898  | -3.152665 | -0.664150 | H                | -2.032891 | 5.101170  | -2.058121 |
| H | 2.323824  | -3.207113 | -0.663711 | C                | -2.743648 | 5.014097  | -0.017953 |
| C | 0.614258  | -1.976840 | -0.202717 | H                | -3.372422 | 5.903014  | -0.116094 |
| C | 4.436275  | -1.954204 | 0.689615  | C                | -2.646433 | 4.352033  | 1.205915  |
| C | 5.355158  | -3.122071 | 0.462625  | H                | -3.193162 | 4.725899  | 2.077066  |
| H | 6.117008  | -2.852528 | -0.278814 | C                | -1.862452 | 3.199990  | 1.319493  |
| H | 4.795903  | -3.990483 | 0.091754  | H                | -1.831674 | 2.676188  | 2.279478  |
| H | 5.858422  | -3.400486 | 1.396360  | C                | -1.159513 | 2.705444  | 0.217840  |
| C | 4.469588  | 0.316581  | 1.296637  |                  |           |           |           |
| C | 5.365502  | 1.353604  | 1.909740  |                  |           |           |           |
| H | 4.812674  | 2.289564  | 2.053823  | <b>14-ts(L1)</b> |           |           |           |
| H | 6.227184  | 1.547151  | 1.259702  | P                | 1.639504  | 0.120460  | 0.174373  |
| H | 5.729382  | 1.004653  | 2.883860  | P                | -1.433135 | 0.549583  | 0.302703  |
| C | 3.951153  | 0.699745  | -0.078924 | O                | 5.377223  | -0.254276 | 0.724870  |
| H | 3.358352  | 1.617365  | -0.002266 | O                | 4.108611  | 0.959484  | -0.807780 |
| H | 4.811026  | 0.878233  | -0.743699 | O                | 3.451606  | -1.066277 | 1.774464  |
| C | 3.109599  | -0.424120 | -0.663288 | O                | 2.010947  | 5.185935  | -1.336755 |
| C | 2.769995  | -0.205436 | -2.114664 | O                | -0.570103 | 5.527000  | -1.253158 |
| H | 2.221719  | 0.740068  | -2.231935 | O                | -3.653062 | 1.973135  | -0.640786 |
| H | 2.152137  | -1.021708 | -2.516193 | O                | -5.139295 | 1.101232  | 0.936141  |
| H | 3.689483  | -0.144701 | -2.714187 | O                | -3.425442 | -0.140180 | 1.940805  |
| C | 2.515401  | -0.970071 | 1.960655  | C                | 3.128166  | -0.080529 | -0.984731 |
| C | 3.349946  | -2.220937 | 1.727142  | C                | 2.701918  | -0.028772 | -2.429475 |
| H | 2.718944  | -3.074923 | 1.442672  | H                | 1.987233  | -0.836030 | -2.644919 |
| H | 3.846446  | -2.485432 | 2.675158  | H                | 3.573628  | -0.156375 | -3.087990 |
| C | 1.624020  | -1.093489 | 3.166093  | H                | 2.224231  | 0.930435  | -2.677550 |
| H | 2.233910  | -1.280588 | 4.062003  | C                | 3.768546  | -1.411128 | -0.606784 |
| H | 0.923507  | -1.931739 | 3.048609  | H                | 4.542871  | -1.659693 | -1.350524 |
| H | 1.054073  | -0.169959 | 3.330956  | H                | 3.024479  | -2.219975 | -0.609569 |
| C | 1.782662  | 3.442575  | -0.633882 | C                | 4.424716  | -1.312190 | 0.765722  |
| C | 2.940269  | 4.213776  | -0.362554 | C                | 5.169714  | -2.549333 | 1.175645  |
| H | 3.475613  | 4.010613  | 0.569446  | H                | 5.643062  | -2.387892 | 2.152117  |
| C | 3.385673  | 5.197069  | -1.236798 | H                | 5.950189  | -2.783650 | 0.441449  |
| H | 4.287270  | 5.766462  | -0.990853 | H                | 4.482583  | -3.399503 | 1.247694  |
| C | 2.690559  | 5.462555  | -2.418589 | C                | 4.774000  | 0.993856  | 0.451745  |
| H | 3.035524  | 6.234663  | -3.110258 | C                | 5.876020  | 2.008091  | 0.321644  |
| C | 1.535233  | 4.729736  | -2.692778 | H                | 6.466257  | 2.051822  | 1.244941  |
| H | 0.964604  | 4.939626  | -3.604708 | H                | 5.463107  | 3.005144  | 0.122299  |
|   |           |           |           | H                | 6.539819  | 1.730089  | -0.505977 |

|   |           |           |           |               |           |           |           |
|---|-----------|-----------|-----------|---------------|-----------|-----------|-----------|
| C | 3.800957  | 1.297250  | 1.590927  | H             | -2.529979 | 3.084977  | 1.587042  |
| H | 4.382404  | 1.342919  | 2.526744  | H             | -3.756692 | 2.432312  | 2.688641  |
| H | 3.321499  | 2.277735  | 1.457837  | C             | -1.631502 | 0.853006  | 3.100307  |
| C | 2.768152  | 0.190915  | 1.713084  | H             | -2.262116 | 0.967475  | 3.994696  |
| C | 1.944935  | 0.282977  | 2.969055  | H             | -0.879224 | 1.653986  | 3.106486  |
| H | 1.218350  | -0.541608 | 3.009476  | H             | -1.115653 | -0.115015 | 3.165145  |
| H | 1.397410  | 1.234912  | 3.008160  | Ni            | -0.035709 | -1.191057 | 0.285135  |
| H | 2.591008  | 0.219387  | 3.857373  | O             | -0.879489 | -2.931085 | 0.586672  |
| C | 1.004160  | 1.818852  | -0.161164 | C             | 0.592582  | -3.104321 | 0.056026  |
| C | 1.817405  | 2.894464  | -0.570715 | C             | 1.429427  | -3.820061 | 0.955215  |
| H | 2.890594  | 2.739960  | -0.661197 | H             | 1.332664  | -3.649686 | 2.030477  |
| C | 1.285822  | 4.129915  | -0.922953 | C             | 2.381101  | -4.695770 | 0.456043  |
| C | 3.409589  | 5.045691  | -1.384398 | H             | 3.033821  | -5.219343 | 1.161545  |
| H | 3.833081  | 4.859034  | -0.383242 | C             | 2.514023  | -4.934886 | -0.920767 |
| H | 3.809216  | 5.994008  | -1.759931 | H             | 3.268373  | -5.628659 | -1.296867 |
| H | 3.725779  | 4.235921  | -2.062922 | C             | 1.627509  | -4.298724 | -1.799810 |
| C | -0.117691 | 4.317326  | -0.872809 | H             | 1.677672  | -4.503563 | -2.874935 |
| C | -1.956040 | 5.757882  | -1.198042 | C             | 0.655732  | -3.420756 | -1.336912 |
| H | -2.521126 | 5.065767  | -1.844580 | C             | -0.431162 | -2.814723 | -2.176371 |
| H | -2.119304 | 6.781099  | -1.553756 | H             | -0.379240 | -1.703599 | -2.108696 |
| H | -2.341879 | 5.679360  | -0.167461 | H             | -0.328439 | -3.072530 | -3.240754 |
| C | -0.925433 | 3.262843  | -0.465181 | C             | -1.744489 | -3.302743 | -1.630356 |
| H | -2.004980 | 3.390838  | -0.482295 | C             | -2.819980 | -3.726666 | -2.414697 |
| C | -0.394023 | 2.009667  | -0.102195 | H             | -2.727294 | -3.684681 | -3.504184 |
| C | -4.264372 | 2.172659  | 0.629450  | C             | -3.996806 | -4.198206 | -1.832801 |
| C | -5.101748 | 3.415153  | 0.508316  | H             | -4.830129 | -4.513949 | -2.464575 |
| H | -5.832262 | 3.294949  | -0.301134 | C             | -4.098409 | -4.279255 | -0.442343 |
| H | -4.472140 | 4.286250  | 0.286383  | H             | -5.011239 | -4.662845 | 0.021022  |
| H | -5.642821 | 3.602640  | 1.443768  | C             | -3.035845 | -3.875879 | 0.362527  |
| C | -4.464077 | -0.149857 | 0.964184  | H             | -3.087418 | -3.926443 | 1.452202  |
| C | -5.459897 | -1.181258 | 1.412440  | C             | -1.880868 | -3.364467 | -0.230925 |
| H | -4.975353 | -2.159758 | 1.508718  |               |           |           |           |
| H | -6.281351 | -1.262818 | 0.690102  | <b>15(L1)</b> |           |           |           |
| H | -5.873201 | -0.894136 | 2.387163  | P             | -1.579405 | -0.761493 | 0.277919  |
| C | -3.900635 | -0.401045 | -0.429658 | P             | 1.577372  | -0.763630 | 0.264396  |
| H | -3.384633 | -1.369534 | -0.462105 | O             | -5.340260 | -0.896433 | -0.341107 |
| H | -4.738521 | -0.441393 | -1.144887 | O             | -3.987719 | 0.663121  | 0.745132  |
| C | -2.958640 | 0.726676  | -0.827836 | O             | -3.492330 | -2.193535 | -0.941350 |
| C | -2.565988 | 0.669432  | -2.281913 | O             | -1.301546 | 4.525812  | -0.066075 |
| H | -2.078745 | -0.289717 | -2.509081 | O             | 1.302751  | 4.525105  | -0.058872 |
| H | -1.871878 | 1.479055  | -2.549010 | O             | 3.984255  | 0.654162  | 0.760801  |
| H | -3.457483 | 0.760867  | -2.919726 | O             | 5.341767  | -0.897059 | -0.331921 |
| C | -2.473178 | 0.931493  | 1.855558  | O             | 3.494610  | -2.183093 | -0.958909 |
| C | -3.223669 | 2.245867  | 1.741728  | C             | -3.122348 | -0.333472 | 1.322910  |

|   |           |           |           |                  |           |           |           |
|---|-----------|-----------|-----------|------------------|-----------|-----------|-----------|
| C | -2.730158 | 0.186990  | 2.681519  | H                | 5.113013  | 2.372179  | -0.852582 |
| H | -2.086467 | -0.538535 | 3.198660  | H                | 6.179139  | 1.190393  | -1.656368 |
| H | -3.622850 | 0.363072  | 3.300647  | C                | 4.496769  | -1.982963 | 0.026848  |
| H | -2.177319 | 1.134419  | 2.605478  | C                | 5.344852  | -3.224510 | 0.031747  |
| C | -3.898253 | -1.644832 | 1.398314  | H                | 4.738845  | -4.100443 | 0.294287  |
| H | -4.717852 | -1.549122 | 2.129439  | H                | 6.161334  | -3.128271 | 0.757549  |
| H | -3.234968 | -2.459193 | 1.725740  | H                | 5.776621  | -3.382134 | -0.964194 |
| C | -4.500618 | -1.979987 | 0.035435  | C                | 3.887289  | -1.660546 | 1.389681  |
| C | -5.351924 | -3.219306 | 0.048572  | H                | 3.220332  | -2.476556 | 1.705188  |
| H | -5.779596 | -3.385288 | -0.947793 | H                | 4.703091  | -1.573833 | 2.126197  |
| H | -6.171541 | -3.114002 | 0.769585  | C                | 3.114005  | -0.347188 | 1.322404  |
| H | -4.749429 | -4.094244 | 0.322267  | C                | 2.712438  | 0.160541  | 2.683117  |
| C | -4.612167 | 0.313716  | -0.480282 | H                | 2.064165  | -0.569362 | 3.188265  |
| C | -5.609113 | 1.401416  | -0.773046 | H                | 2.160648  | 1.108980  | 2.611401  |
| H | -6.162584 | 1.180286  | -1.693943 | H                | 3.600525  | 0.330259  | 3.310554  |
| H | -5.101096 | 2.367211  | -0.891442 | C                | 2.677284  | -1.037687 | -1.276300 |
| H | -6.324100 | 1.480325  | 0.055246  | C                | 3.597816  | 0.130592  | -1.581604 |
| C | -3.585244 | 0.114212  | -1.589497 | H                | 3.024121  | 1.053703  | -1.749182 |
| H | -4.132672 | -0.106325 | -2.521690 | H                | 4.150900  | -0.083315 | -2.511996 |
| H | -3.007262 | 1.034010  | -1.761122 | C                | 1.837509  | -1.436432 | -2.458199 |
| C | -2.670446 | -1.053492 | -1.265935 | H                | 2.473918  | -1.714678 | -3.312209 |
| C | -1.823145 | -1.468935 | -2.436561 | H                | 1.187461  | -0.605743 | -2.767413 |
| H | -1.193244 | -2.328330 | -2.165907 | H                | 1.201194  | -2.295598 | -2.203023 |
| H | -1.165854 | -0.645508 | -2.749554 | Ni               | 0.000258  | -1.986337 | 0.703571  |
| H | -2.453817 | -1.753979 | -3.292630 |                  |           |           |           |
| C | -0.709163 | 0.865925  | 0.060998  | <b>16-ts(L1)</b> |           |           |           |
| C | -1.384346 | 2.100206  | 0.013573  | P                | -0.445337 | 1.475621  | -0.336735 |
| H | -2.471652 | 2.104416  | 0.063973  | P                | 1.416998  | -0.959907 | 0.049266  |
| C | -0.706769 | 3.314744  | -0.032465 | O                | -2.914209 | 4.295891  | -0.756494 |
| C | -2.703795 | 4.563455  | -0.135008 | O                | -1.050426 | 4.005829  | 0.628072  |
| H | -3.082180 | 4.065821  | -1.044272 | O                | -2.525610 | 2.238106  | -1.798470 |
| H | -2.990829 | 5.620410  | -0.170909 | O                | 3.845084  | 4.493052  | 0.400451  |
| H | -3.180734 | 4.100336  | 0.745603  | O                | 5.424564  | 2.433936  | 0.496945  |
| C | 0.707290  | 3.314308  | -0.029658 | O                | 3.842405  | -2.136257 | 0.783842  |
| C | 2.705503  | 4.562592  | -0.115575 | O                | 3.466936  | -4.093822 | -0.429431 |
| H | 3.174539  | 4.094431  | 0.766551  | O                | 1.436362  | -3.288930 | -1.254706 |
| H | 2.993133  | 5.619629  | -0.143371 | C                | -1.337655 | 2.624065  | 0.876645  |
| H | 3.091792  | 4.069865  | -1.024241 | C                | -0.912872 | 2.334032  | 2.291631  |
| C | 1.383918  | 2.099176  | 0.015371  | H                | -1.054490 | 1.267835  | 2.522627  |
| H | 2.471089  | 2.102786  | 0.068029  | H                | -1.509840 | 2.924088  | 3.002687  |
| C | 0.707691  | 0.865257  | 0.059781  | H                | 0.147235  | 2.581507  | 2.445872  |
| C | 4.617404  | 0.316078  | -0.463574 | C                | -2.817953 | 2.364137  | 0.621858  |
| C | 5.618493  | 1.404575  | -0.738205 | H                | -3.417679 | 2.877811  | 1.390720  |
| H | 6.326601  | 1.474969  | 0.096706  | H                | -3.026161 | 1.285097  | 0.684275  |

|   |           |           |           |    |           |           |           |
|---|-----------|-----------|-----------|----|-----------|-----------|-----------|
| C | -3.215575 | 2.905329  | -0.748792 | C  | 1.821764  | -3.392991 | 1.150798  |
| C | -4.678227 | 2.752015  | -1.052890 | H  | 0.739088  | -3.322623 | 1.337137  |
| H | -4.903690 | 3.204781  | -2.026049 | H  | 2.267172  | -4.041616 | 1.921989  |
| H | -5.288152 | 3.242232  | -0.284511 | C  | 2.477621  | -2.014785 | 1.212772  |
| H | -4.940087 | 1.687331  | -1.096403 | C  | 2.534945  | -1.431141 | 2.602075  |
| C | -1.528368 | 4.540240  | -0.605962 | H  | 1.528700  | -1.257200 | 3.006167  |
| C | -1.340829 | 6.029373  | -0.524080 | H  | 3.067403  | -0.469513 | 2.604845  |
| H | -1.717973 | 6.511363  | -1.434202 | H  | 3.068408  | -2.113544 | 3.279806  |
| H | -0.278741 | 6.280122  | -0.407359 | C  | 1.936961  | -1.966292 | -1.480791 |
| H | -1.891736 | 6.425842  | 0.337489  | C  | 3.449105  | -2.029636 | -1.614332 |
| C | -0.808895 | 3.899727  | -1.787890 | H  | 3.882906  | -1.020797 | -1.687007 |
| H | -1.192126 | 4.365369  | -2.710523 | H  | 3.698493  | -2.561929 | -2.546671 |
| H | 0.271829  | 4.095294  | -1.754907 | C  | 1.258660  | -1.450151 | -2.721486 |
| C | -1.107103 | 2.410359  | -1.856863 | H  | 1.514584  | -2.079392 | -3.586806 |
| C | -0.628055 | 1.786546  | -3.141138 | H  | 1.576197  | -0.420178 | -2.938198 |
| H | -0.898540 | 0.725280  | -3.187526 | H  | 0.165483  | -1.458633 | -2.603210 |
| H | 0.462493  | 1.891269  | -3.234807 | Ni | -0.775028 | -0.629443 | -0.034392 |
| H | -1.094265 | 2.293389  | -3.998829 | O  | -1.746967 | -2.341232 | 0.802162  |
| C | 1.346738  | 1.809412  | -0.108940 | C  | -2.257495 | -1.674898 | 1.870032  |
| C | 1.895727  | 3.098090  | 0.037287  | C  | -1.410395 | -1.545754 | 2.985370  |
| H | 1.231769  | 3.960129  | 0.047065  | H  | -0.438125 | -2.041814 | 2.946622  |
| C | 3.258337  | 3.293888  | 0.240647  | C  | -1.816257 | -0.827870 | 4.103775  |
| C | 3.029678  | 5.638666  | 0.359762  | H  | -1.142373 | -0.734863 | 4.959644  |
| H | 2.531833  | 5.752138  | -0.617865 | C  | -3.083449 | -0.242541 | 4.133461  |
| H | 3.688204  | 6.499442  | 0.517706  | H  | -3.414122 | 0.319551  | 5.009692  |
| H | 2.264956  | 5.630120  | 1.153644  | C  | -3.935570 | -0.406043 | 3.041596  |
| C | 4.121297  | 2.168910  | 0.302079  | H  | -4.940711 | 0.027517  | 3.068978  |
| C | 6.315959  | 1.345586  | 0.541282  | C  | -3.557596 | -1.122426 | 1.901381  |
| H | 6.086996  | 0.652911  | 1.368110  | C  | -4.487744 | -1.314140 | 0.737045  |
| H | 7.315680  | 1.763922  | 0.700242  | H  | -4.495892 | -0.383359 | 0.126183  |
| H | 6.316902  | 0.781145  | -0.406121 | H  | -5.522687 | -1.430569 | 1.093189  |
| C | 3.580866  | 0.892831  | 0.188471  | C  | -4.081729 | -2.468948 | -0.121081 |
| H | 4.229242  | 0.024545  | 0.300977  | C  | -4.964059 | -3.432265 | -0.590055 |
| C | 2.202679  | 0.691128  | -0.009191 | H  | -6.019768 | -3.345402 | -0.310665 |
| C | 4.060110  | -2.807136 | -0.452129 | C  | -4.538738 | -4.506029 | -1.377835 |
| C | 5.546068  | -2.997907 | -0.571232 | H  | -5.249757 | -5.254199 | -1.732719 |
| H | 5.912834  | -3.582026 | 0.281685  | C  | -3.171590 | -4.611928 | -1.675013 |
| H | 6.058852  | -2.027492 | -0.578812 | H  | -2.808770 | -5.453800 | -2.272734 |
| H | 5.792245  | -3.534093 | -1.495607 | C  | -2.260772 | -3.672968 | -1.232766 |
| C | 2.062744  | -4.034558 | -0.214834 | H  | -1.198824 | -3.748510 | -1.486120 |
| C | 1.524253  | -5.433008 | -0.315508 | C  | -2.692107 | -2.516519 | -0.494014 |
| H | 0.440030  | -5.435680 | -0.147473 | C  | -2.177154 | -1.085555 | -1.193710 |
| H | 2.000856  | -6.080880 | 0.429887  | O  | -2.540284 | -0.748917 | -2.278255 |
| H | 1.727210  | -5.837524 | -1.314680 |    |           |           |           |

## 17(L1)

|   |           |           |           |    |           |           |           |
|---|-----------|-----------|-----------|----|-----------|-----------|-----------|
|   |           |           |           | H  | -1.416977 | 5.779266  | -1.473331 |
| P | 0.361614  | 1.323424  | 0.323455  | C  | -3.949805 | 2.712402  | -0.846435 |
| P | -1.890992 | -0.761047 | 0.091186  | C  | -6.170610 | 2.218552  | -1.465205 |
| O | 2.977697  | 3.899631  | 1.327420  | H  | -5.898825 | 1.446584  | -2.204518 |
| O | 1.305877  | 3.894751  | -0.304894 | H  | -7.040122 | 2.770399  | -1.838822 |
| O | 2.340977  | 1.779412  | 2.085966  | H  | -6.450720 | 1.722911  | -0.520190 |
| O | -3.274990 | 4.956178  | -0.984665 | C  | -3.655566 | 1.382334  | -0.568163 |
| O | -5.143379 | 3.160693  | -1.278367 | H  | -4.417637 | 0.621689  | -0.732207 |
| O | -4.205170 | -1.662346 | -1.176511 | C  | -2.372362 | 0.981911  | -0.152446 |
| O | -4.417989 | -3.555340 | 0.181114  | C  | -4.817486 | -2.208102 | -0.015283 |
| O | -2.572904 | -2.922591 | 1.467056  | C  | -6.297586 | -2.209917 | -0.278230 |
| C | 1.490436  | 2.508381  | -0.647214 | H  | -6.514364 | -2.802525 | -1.175365 |
| C | 1.238669  | 2.389423  | -2.128617 | H  | -6.659741 | -1.185949 | -0.438634 |
| H | 1.359972  | 1.346090  | -2.452155 | H  | -6.838590 | -2.646616 | 0.570067  |
| H | 1.946708  | 3.016879  | -2.690812 | C  | -3.009027 | -3.675904 | 0.339821  |
| H | 0.219887  | 2.712120  | -2.387306 | C  | -2.703624 | -5.111967 | 0.658484  |
| C | 2.906725  | 2.116698  | -0.251967 | H  | -1.624185 | -5.238897 | 0.812343  |
| H | 3.626845  | 2.638527  | -0.903876 | H  | -3.028156 | -5.767880 | -0.158416 |
| H | 3.055237  | 1.038789  | -0.378701 | H  | -3.225497 | -5.407721 | 1.576814  |
| C | 3.187729  | 2.499930  | 1.195577  | C  | -2.358058 | -3.195482 | -0.956186 |
| C | 4.598109  | 2.210949  | 1.624739  | H  | -1.262478 | -3.261782 | -0.881620 |
| H | 4.752669  | 2.560582  | 2.652968  | H  | -2.696091 | -3.849937 | -1.775998 |
| H | 5.314098  | 2.717026  | 0.965403  | C  | -2.771828 | -1.757570 | -1.251076 |
| H | 4.789463  | 1.131422  | 1.588753  | C  | -2.389594 | -1.286888 | -2.629581 |
| C | 1.639129  | 4.263744  | 1.027397  | H  | -1.301920 | -1.329509 | -2.764677 |
| C | 1.561850  | 5.763907  | 1.085108  | H  | -2.720427 | -0.251507 | -2.796191 |
| H | 1.850175  | 6.123904  | 2.080216  | H  | -2.869862 | -1.920699 | -3.389771 |
| H | 0.542117  | 6.107217  | 0.868566  | C  | -2.928901 | -1.532563 | 1.480442  |
| H | 2.243645  | 6.198590  | 0.343897  | C  | -4.422703 | -1.417593 | 1.226601  |
| C | 0.738440  | 3.566116  | 2.041582  | H  | -4.733629 | -0.365840 | 1.142714  |
| H | 1.022768  | 3.924829  | 3.044315  | H  | -4.957759 | -1.846793 | 2.089618  |
| H | -0.316903 | 3.834870  | 1.889652  | C  | -2.537935 | -0.991023 | 2.829277  |
| C | 0.934953  | 2.058960  | 1.992348  | H  | -3.074389 | -1.530183 | 3.624038  |
| C | 0.285262  | 1.360954  | 3.156009  | H  | -2.796909 | 0.074877  | 2.904509  |
| H | 0.505598  | 0.285421  | 3.136611  | H  | -1.461081 | -1.105684 | 3.008751  |
| H | -0.805323 | 1.495935  | 3.133208  | Ni | 0.294403  | -0.891644 | 0.250868  |
| H | 0.663378  | 1.769850  | 4.104996  | C  | 0.725675  | -1.891653 | 1.631860  |
| C | -1.349307 | 1.943767  | -0.016614 | O  | 0.935262  | -2.553408 | 2.564622  |
| C | -1.661509 | 3.291098  | -0.283487 | O  | 2.673176  | -0.820372 | -1.810441 |
| H | -0.872431 | 4.037120  | -0.224558 | C  | 4.044799  | -0.740226 | -1.743961 |
| C | -2.931260 | 3.687136  | -0.691539 | C  | 4.665442  | -0.220563 | -2.880901 |
| C | -2.295882 | 5.953371  | -0.830424 | H  | 4.051563  | 0.003570  | -3.755577 |
| H | -1.959966 | 6.035824  | 0.216705  | C  | 6.037168  | 0.013863  | -2.875122 |
| H | -2.761314 | 6.900744  | -1.123939 | H  | 6.519003  | 0.422289  | -3.766483 |



|                  |           |           |           |   |           |           |           |
|------------------|-----------|-----------|-----------|---|-----------|-----------|-----------|
| C                | 6.786789  | -0.270381 | -1.734566 | H | 4.840750  | -1.946376 | 2.034000  |
| H                | 7.863546  | -0.088361 | -1.721926 | C | 4.308491  | 2.258360  | 0.603549  |
| C                | 6.154472  | -0.788476 | -0.605800 | C | 5.183148  | 3.455634  | 0.355281  |
| H                | 6.735285  | -1.007277 | 0.295080  | H | 5.680284  | 3.764870  | 1.282612  |
| C                | 4.776252  | -1.021138 | -0.580944 | H | 4.589938  | 4.297887  | -0.022912 |
| C                | 4.075179  | -1.567594 | 0.627640  | H | 5.951332  | 3.205064  | -0.386513 |
| H                | 3.261269  | -0.874629 | 0.933766  | C | 3.209980  | 2.500294  | 1.627275  |
| H                | 4.772373  | -1.637996 | 1.473008  | H | 3.685568  | 2.822768  | 2.567767  |
| C                | 3.467145  | -2.902119 | 0.323391  | H | 2.539927  | 3.312815  | 1.309722  |
| C                | 3.885428  | -4.071669 | 0.957860  | C | 2.432514  | 1.220229  | 1.899041  |
| H                | 4.703231  | -4.018545 | 1.681868  | C | 1.582883  | 1.357147  | 3.131895  |
| C                | 3.255797  | -5.289531 | 0.705625  | H | 1.095530  | 0.408509  | 3.387331  |
| H                | 3.591392  | -6.192649 | 1.220898  | H | 0.815450  | 2.131160  | 2.996250  |
| C                | 2.189333  | -5.348475 | -0.191707 | H | 2.213975  | 1.646520  | 3.984847  |
| H                | 1.686392  | -6.298437 | -0.387754 | C | 0.461505  | 2.059776  | -0.311856 |
| C                | 1.762622  | -4.193061 | -0.835276 | C | 1.052589  | 3.209312  | -0.873737 |
| H                | 0.923714  | -4.218525 | -1.534674 | H | 2.135639  | 3.305046  | -0.868386 |
| C                | 2.402728  | -2.967261 | -0.597585 | C | 0.297614  | 4.194912  | -1.501061 |
| C                | 1.837609  | -1.765942 | -1.253747 | C | 2.199516  | 5.505204  | -1.981292 |
| O                | 0.663215  | -1.717783 | -1.655708 | H | 2.534157  | 5.587384  | -0.933826 |
|                  |           |           |           | H | 2.412453  | 6.451265  | -2.491005 |
|                  |           |           |           | H | 2.770299  | 4.702120  | -2.476885 |
| <b>18-ts(L1)</b> |           |           |           | C | -1.110272 | 4.046560  | -1.591160 |
| P                | 1.432997  | 0.635256  | 0.360287  | C | -3.172837 | 4.926257  | -2.316992 |
| P                | -1.666110 | 0.438892  | 0.358332  | H | -3.495788 | 4.018689  | -2.853305 |
| O                | 5.140392  | 1.222896  | 1.091570  | H | -3.518193 | 5.804000  | -2.873744 |
| O                | 3.742147  | 1.905133  | -0.652863 | H | -3.642010 | 4.936695  | -1.319187 |
| O                | 3.357545  | 0.159251  | 2.161195  | C | -1.703578 | 2.922100  | -1.029438 |
| O                | 0.810235  | 5.302851  | -2.067601 | H | -2.779685 | 2.778890  | -1.122616 |
| O                | -1.771545 | 5.025102  | -2.233935 | C | -0.940422 | 1.932564  | -0.381850 |
| O                | -4.163384 | 0.949659  | -0.802539 | C | -4.836702 | 1.305263  | 0.399509  |
| O                | -5.376410 | 0.159054  | 1.036394  | C | -5.989759 | 2.181559  | -0.000867 |
| O                | -3.412605 | -0.218837 | 2.250090  | H | -6.648660 | 1.635278  | -0.686628 |
| C                | 3.028033  | 0.659515  | -0.719568 | H | -5.628824 | 3.085732  | -0.507512 |
| C                | 2.714995  | 0.463907  | -2.179948 | H | -6.569970 | 2.478273  | 0.881212  |
| H                | 2.170822  | -0.471488 | -2.346061 | C | -4.373930 | -0.794206 | 1.366449  |
| H                | 3.648226  | 0.422990  | -2.760792 | C | -5.028180 | -1.907767 | 2.131881  |
| H                | 2.106115  | 1.290700  | -2.572301 | H | -4.279157 | -2.659490 | 2.410879  |
| C                | 3.925835  | -0.417347 | -0.134660 | H | -5.805764 | -2.386797 | 1.524941  |
| H                | 4.793361  | -0.565594 | -0.798178 | H | -5.486110 | -1.511875 | 3.046466  |
| H                | 3.396145  | -1.371889 | -0.057724 | C | -3.734449 | -1.258480 | 0.059761  |
| C                | 4.431755  | 0.000355  | 1.240877  | H | -2.949959 | -1.998745 | 0.270823  |
| C                | 5.367537  | -1.000693 | 1.855951  | H | -4.507727 | -1.747713 | -0.554595 |
| H                | 5.740082  | -0.621904 | 2.815525  | C | -3.157714 | -0.068939 | -0.699555 |
| H                | 6.221924  | -1.187210 | 1.193826  |   |           |           |           |

|               |           |           |           |   |           |           |           |
|---------------|-----------|-----------|-----------|---|-----------|-----------|-----------|
| C             | -2.759143 | -0.392986 | -2.113721 | P | -1.657211 | 0.386152  | 0.399296  |
| H             | -2.054234 | -1.231477 | -2.133207 | O | 5.117324  | 1.545855  | 0.956258  |
| H             | -2.293889 | 0.470180  | -2.611760 | O | 3.629280  | 2.036073  | -0.774292 |
| H             | -3.647201 | -0.685015 | -2.693061 | O | 3.450325  | 0.351287  | 2.076053  |
| C             | -2.787159 | 0.989325  | 1.802893  | O | 0.586745  | 5.248360  | -2.232959 |
| C             | -3.869482 | 1.965638  | 1.369306  | O | -1.991564 | 4.896506  | -2.274503 |
| H             | -3.432951 | 2.877830  | 0.937461  | O | -4.188786 | 0.839178  | -0.662114 |
| H             | -4.434981 | 2.269552  | 2.265210  | O | -5.330429 | 0.067126  | 1.231923  |
| C             | -2.000265 | 1.548478  | 2.957829  | O | -3.317770 | -0.288514 | 2.371017  |
| H             | -2.674440 | 1.753450  | 3.802369  | C | 3.034309  | 0.728139  | -0.795570 |
| H             | -1.520397 | 2.494185  | 2.667502  | C | 2.737918  | 0.434489  | -2.243913 |
| H             | -1.227632 | 0.857062  | 3.309328  | H | 2.472549  | -0.620376 | -2.378332 |
| Ni            | 0.013207  | -1.025625 | 0.862063  | H | 3.638473  | 0.632555  | -2.842728 |
| O             | -0.534626 | -3.003485 | 0.397540  | H | 1.922661  | 1.055210  | -2.642345 |
| C             | -1.084601 | -3.588745 | -0.682049 | C | 4.046418  | -0.237090 | -0.199189 |
| C             | -2.104342 | -4.532855 | -0.474142 | H | 4.911534  | -0.293681 | -0.879462 |
| H             | -2.376956 | -4.782285 | 0.554208  | H | 3.637947  | -1.249681 | -0.108672 |
| C             | -2.749438 | -5.120452 | -1.557173 | C | 4.528832  | 0.266276  | 1.153488  |
| H             | -3.540915 | -5.853648 | -1.380566 | C | 5.563566  | -0.617219 | 1.788671  |
| C             | -2.386694 | -4.782632 | -2.863528 | H | 5.888974  | -0.180814 | 2.740808  |
| H             | -2.892964 | -5.243455 | -3.714706 | H | 6.435095  | -0.720895 | 1.131175  |
| C             | -1.367094 | -3.856268 | -3.071546 | H | 5.142272  | -1.610633 | 1.983514  |
| H             | -1.073272 | -3.583107 | -4.090219 | C | 4.183901  | 2.483847  | 0.460932  |
| C             | -0.712478 | -3.249464 | -1.996599 | C | 4.931058  | 3.750551  | 0.150351  |
| C             | 0.395954  | -2.259250 | -2.164936 | H | 5.410094  | 4.143651  | 1.055063  |
| H             | 0.204237  | -1.375100 | -1.517451 | H | 4.246770  | 4.511727  | -0.246121 |
| H             | 0.446843  | -1.906939 | -3.205372 | H | 5.707026  | 3.550707  | -0.598654 |
| C             | 1.692768  | -2.894130 | -1.761719 | C | 3.092689  | 2.658440  | 1.508984  |
| C             | 2.622405  | -3.250132 | -2.746160 | H | 3.562917  | 3.038740  | 2.430081  |
| H             | 2.401458  | -2.997774 | -3.787717 | H | 2.349295  | 3.403450  | 1.190722  |
| C             | 3.808416  | -3.906055 | -2.430944 | C | 2.436729  | 1.322216  | 1.819281  |
| H             | 4.519694  | -4.158399 | -3.221234 | C | 1.593060  | 1.379488  | 3.061691  |
| C             | 4.072652  | -4.247804 | -1.104766 | H | 1.147070  | 0.398725  | 3.277854  |
| H             | 4.989133  | -4.781704 | -0.842020 | H | 0.794794  | 2.125536  | 2.957741  |
| C             | 3.159487  | -3.908975 | -0.115443 | H | 2.219472  | 1.663441  | 3.919504  |
| H             | 3.347408  | -4.166188 | 0.928363  | C | 0.409240  | 2.042322  | -0.387828 |
| C             | 1.970542  | -3.219319 | -0.418281 | C | 0.941569  | 3.193176  | -1.004768 |
| C             | 1.146220  | -2.858672 | 0.774061  | H | 2.019768  | 3.322274  | -1.044973 |
| O             | 1.396385  | -3.279273 | 1.879707  | C | 0.131883  | 4.141522  | -1.620488 |
| C             | -0.395238 | -1.383062 | 2.624583  | C | 1.971883  | 5.494791  | -2.214817 |
| O             | -0.744201 | -1.696647 | 3.675302  | H | 2.349110  | 5.617350  | -1.185730 |
|               |           |           |           | H | 2.130929  | 6.432119  | -2.758749 |
|               |           |           |           | H | 2.544575  | 4.695581  | -2.713884 |
| <b>19(L1)</b> |           |           |           | C | -1.274070 | 3.954361  | -1.641507 |
| P             | 1.446748  | 0.673699  | 0.299583  |   |           |           |           |

|    |           |           |           |              |           |           |           |
|----|-----------|-----------|-----------|--------------|-----------|-----------|-----------|
| C  | -3.393299 | 4.760702  | -2.284261 | C            | -0.588442 | -3.210206 | -2.077549 |
| H  | -3.717801 | 3.831255  | -2.780188 | C            | 0.615389  | -2.321351 | -2.061584 |
| H  | -3.787956 | 5.613857  | -2.846012 | H            | 0.411445  | -1.408322 | -1.468861 |
| H  | -3.810906 | 4.788178  | -1.264152 | H            | 0.848752  | -1.997060 | -3.087165 |
| C  | -1.808919 | 2.829825  | -1.025809 | C            | 1.795487  | -3.070853 | -1.499782 |
| H  | -2.883267 | 2.656217  | -1.067573 | C            | 2.539417  | -3.832918 | -2.416487 |
| C  | -0.989976 | 1.876249  | -0.392474 | H            | 2.262763  | -3.782868 | -3.474127 |
| C  | -4.822041 | 1.205793  | 0.558902  | C            | 3.590740  | -4.650219 | -2.024909 |
| C  | -5.992241 | 2.071624  | 0.186698  | H            | 4.145671  | -5.223288 | -2.771878 |
| H  | -6.673139 | 1.511272  | -0.465329 | C            | 3.922553  | -4.738650 | -0.672072 |
| H  | -5.652858 | 2.967451  | -0.348856 | H            | 4.734949  | -5.389145 | -0.339136 |
| H  | -6.541160 | 2.381575  | 1.084071  | C            | 3.212512  | -3.986431 | 0.249003  |
| C  | -4.312943 | -0.879175 | 1.529145  | H            | 3.465602  | -4.030717 | 1.309706  |
| C  | -4.930603 | -1.987832 | 2.330711  | C            | 2.153149  | -3.135845 | -0.134712 |
| H  | -4.169645 | -2.737079 | 2.582589  | C            | 1.599592  | -2.306346 | 0.998211  |
| H  | -5.730398 | -2.473689 | 1.759155  | O            | 2.052031  | -2.439483 | 2.110551  |
| H  | -5.352984 | -1.586852 | 3.260131  | C            | -0.491153 | -1.523789 | 2.546264  |
| C  | -3.709590 | -1.354123 | 0.214015  | O            | -0.831653 | -2.018090 | 3.520514  |
| H  | -2.903584 | -2.072902 | 0.415691  |              |           |           |           |
| H  | -4.493458 | -1.863023 | -0.368874 | <b>2(L2)</b> |           |           |           |
| C  | -3.175788 | -0.174172 | -0.586841 | P            | -2.636572 | 0.373438  | 0.058587  |
| C  | -2.819541 | -0.511437 | -2.009104 | P            | 0.044612  | 0.038759  | 1.508940  |
| H  | -2.045685 | -1.287734 | -2.044147 | C            | -2.658681 | 0.526940  | 1.907205  |
| H  | -2.457101 | 0.374653  | -2.550067 | H            | -2.520112 | 1.593488  | 2.148670  |
| H  | -3.704603 | -0.896362 | -2.536528 | H            | -3.631763 | 0.225418  | 2.327519  |
| C  | -2.722779 | 0.918814  | 1.895082  | C            | -1.514212 | -0.289741 | 2.476488  |
| C  | -3.826088 | 1.884817  | 1.487695  | H            | -1.724030 | -1.367892 | 2.379295  |
| H  | -3.411711 | 2.796660  | 1.033920  | H            | -1.361387 | -0.098345 | 3.550199  |
| H  | -4.362106 | 2.191620  | 2.400342  | C            | -4.031998 | 1.425015  | -0.477716 |
| C  | -1.900522 | 1.487207  | 3.019439  | C            | -4.766756 | 1.089645  | -1.626217 |
| H  | -2.548904 | 1.696945  | 3.882470  | H            | -4.540509 | 0.165213  | -2.166261 |
| H  | -1.429844 | 2.430710  | 2.708743  | C            | -5.785563 | 1.920997  | -2.084490 |
| H  | -1.117123 | 0.795982  | 3.350301  | H            | -6.350929 | 1.641325  | -2.976922 |
| Ni | 0.091936  | -1.083235 | 0.795554  | C            | -6.086079 | 3.104269  | -1.409282 |
| O  | -0.820708 | -2.909085 | 0.279645  | H            | -6.887441 | 3.754362  | -1.768500 |
| C  | -1.225581 | -3.459041 | -0.827869 | C            | -5.353730 | 3.454264  | -0.276118 |
| C  | -2.348647 | -4.329144 | -0.837757 | H            | -5.577643 | 4.380893  | 0.258437  |
| H  | -2.840831 | -4.537596 | 0.117238  | C            | -4.333089 | 2.625121  | 0.183783  |
| C  | -2.813220 | -4.900578 | -2.015361 | H            | -3.766913 | 2.925521  | 1.069038  |
| H  | -3.681374 | -5.566429 | -1.982789 | C            | -3.248175 | -1.334783 | -0.214320 |
| C  | -2.185128 | -4.635703 | -3.237052 | C            | -2.393588 | -2.223034 | -0.880001 |
| H  | -2.556214 | -5.079530 | -4.163753 | H            | -1.421866 | -1.851700 | -1.228911 |
| C  | -1.071638 | -3.795782 | -3.248880 | C            | -2.769730 | -3.549013 | -1.089292 |
| H  | -0.561602 | -3.580144 | -4.195044 | H            | -2.090886 | -4.230439 | -1.609253 |

|    |           |           |           |                 |           |           |           |
|----|-----------|-----------|-----------|-----------------|-----------|-----------|-----------|
| C  | -4.009911 | -3.996980 | -0.637205 | C               | 3.366558  | -2.519665 | -0.874698 |
| H  | -4.310112 | -5.035155 | -0.800301 | H               | 4.265328  | -2.668808 | -0.268299 |
| C  | -4.872122 | -3.117499 | 0.021860  | C               | 2.778935  | -3.604722 | -1.524249 |
| H  | -5.846418 | -3.468036 | 0.371883  | H               | 3.218423  | -4.601213 | -1.432609 |
| C  | -4.495554 | -1.792659 | 0.233310  | C               | 1.630960  | -3.404764 | -2.290642 |
| H  | -5.181328 | -1.107255 | 0.742065  | H               | 1.165518  | -4.243767 | -2.815078 |
| C  | 0.798848  | 1.474797  | 2.359412  | C               | 1.081285  | -2.131265 | -2.400303 |
| C  | 0.960616  | 1.560493  | 3.749772  | H               | 0.186388  | -1.958198 | -3.002966 |
| H  | 0.661349  | 0.724753  | 4.390593  | C               | 1.662234  | -1.030590 | -1.746651 |
| C  | 1.516901  | 2.702166  | 4.322726  | C               | 0.954558  | 0.270033  | -1.803674 |
| H  | 1.641418  | 2.760842  | 5.406914  | O               | -0.194055 | 0.367612  | -2.380015 |
| C  | 1.915992  | 3.768836  | 3.514661  |                 |           |           |           |
| H  | 2.353402  | 4.662077  | 3.967713  |                 |           |           |           |
| C  | 1.756488  | 3.693995  | 2.131889  | <b>3-ts(L2)</b> |           |           |           |
| H  | 2.066893  | 4.525960  | 1.495341  | P               | -2.160978 | -0.654284 | 0.385727  |
| C  | 1.195497  | 2.553732  | 1.557865  | P               | 0.839457  | -1.393199 | 0.789612  |
| H  | 1.060059  | 2.479457  | 0.472460  | C               | -1.650922 | -1.277528 | 2.060012  |
| C  | 1.068221  | -1.402532 | 1.989255  | H               | -1.420905 | -0.392727 | 2.674839  |
| C  | 0.592035  | -2.676154 | 1.637960  | H               | -2.481762 | -1.800213 | 2.560354  |
| H  | -0.370660 | -2.775647 | 1.123946  | C               | -0.433090 | -2.175766 | 1.903323  |
| C  | 1.333264  | -3.818035 | 1.924634  | H               | -0.722016 | -3.114272 | 1.400507  |
| H  | 0.945640  | -4.800038 | 1.642065  | H               | -0.000224 | -2.465935 | 2.874407  |
| C  | 2.574288  | -3.706920 | 2.553218  | C               | -3.157502 | 0.832417  | 0.731134  |
| H  | 3.160121  | -4.602250 | 2.775105  | C               | -4.419289 | 1.059766  | 0.165620  |
| C  | 3.065328  | -2.447062 | 2.890522  | H               | -4.904525 | 0.275480  | -0.421786 |
| H  | 4.038513  | -2.350621 | 3.379198  | C               | -5.060021 | 2.286246  | 0.340057  |
| C  | 2.319706  | -1.301656 | 2.610192  | H               | -6.044853 | 2.447591  | -0.105740 |
| H  | 2.720557  | -0.319644 | 2.877523  | C               | -4.448892 | 3.303119  | 1.071906  |
| Ni | -0.511154 | 0.374556  | -0.517709 | H               | -4.952388 | 4.264056  | 1.202850  |
| O  | 1.693031  | 1.486969  | -1.886536 | C               | -3.185226 | 3.092785  | 1.625675  |
| C  | 3.037772  | 1.619946  | -2.058998 | H               | -2.687134 | 3.890960  | 2.181726  |
| C  | 3.467230  | 2.561559  | -2.998957 | C               | -2.541497 | 1.871793  | 1.449094  |
| H  | 2.714331  | 3.088349  | -3.588637 | H               | -1.534039 | 1.730673  | 1.858100  |
| C  | 4.827116  | 2.812182  | -3.164438 | C               | -3.330653 | -1.943065 | -0.178048 |
| H  | 5.154543  | 3.548206  | -3.903042 | C               | -3.010555 | -2.670424 | -1.331111 |
| C  | 5.764180  | 2.123040  | -2.395923 | H               | -2.100598 | -2.418692 | -1.887053 |
| H  | 6.832259  | 2.312739  | -2.524341 | C               | -3.838549 | -3.705729 | -1.765631 |
| C  | 5.327931  | 1.188973  | -1.456148 | H               | -3.579329 | -4.268371 | -2.665656 |
| H  | 6.055658  | 0.647590  | -0.843960 | C               | -4.993011 | -4.021106 | -1.051593 |
| C  | 3.968944  | 0.932012  | -1.264450 | H               | -5.642321 | -4.831818 | -1.391524 |
| C  | 3.459665  | -0.070231 | -0.272798 | C               | -5.320923 | -3.301433 | 0.099253  |
| H  | 2.702003  | 0.422713  | 0.367384  | H               | -6.225807 | -3.547660 | 0.660591  |
| H  | 4.270426  | -0.405660 | 0.388590  | C               | -4.493458 | -2.270554 | 0.535755  |
| C  | 2.822815  | -1.237614 | -0.966431 | H               | -4.756001 | -1.710111 | 1.438943  |
|    |           |           |           | C               | 2.034913  | -0.637480 | 1.954631  |

|    |           |           |           |              |           |           |           |
|----|-----------|-----------|-----------|--------------|-----------|-----------|-----------|
| C  | 1.625735  | -0.122605 | 3.194907  | H            | 2.876284  | 0.006171  | -3.553860 |
| H  | 0.596037  | -0.260771 | 3.537801  | C            | 2.243955  | 1.087723  | -1.808381 |
| C  | 2.519440  | 0.569563  | 4.009618  | C            | 0.893070  | 0.515667  | -1.923568 |
| H  | 2.183124  | 0.954017  | 4.976008  | O            | 0.502792  | -0.308746 | -2.763177 |
| C  | 3.837588  | 0.766596  | 3.597453  |              |           |           |           |
| H  | 4.538198  | 1.309411  | 4.236582  | <b>4(L2)</b> |           |           |           |
| C  | 4.255156  | 0.262414  | 2.365243  | P            | 1.304051  | 1.403086  | 0.431918  |
| H  | 5.285510  | 0.411848  | 2.031286  | P            | -1.756570 | 1.221048  | 0.409657  |
| C  | 3.363208  | -0.430011 | 1.548906  | C            | 0.376887  | 2.536037  | 1.572306  |
| H  | 3.706056  | -0.818086 | 0.583626  | H            | 0.312660  | 2.036714  | 2.552566  |
| C  | 1.780689  | -2.829743 | 0.151366  | H            | 0.933589  | 3.470563  | 1.739579  |
| C  | 1.755755  | -3.074099 | -1.226985 | C            | -1.008522 | 2.803152  | 1.006211  |
| H  | 1.211459  | -2.384981 | -1.881987 | H            | -0.951194 | 3.455222  | 0.119037  |
| C  | 2.434085  | -4.171623 | -1.758444 | H            | -1.667811 | 3.322290  | 1.719946  |
| H  | 2.416041  | -4.350218 | -2.836386 | C            | 2.327877  | 0.384012  | 1.545934  |
| C  | 3.134956  | -5.033505 | -0.917364 | C            | 3.699989  | 0.190464  | 1.341484  |
| H  | 3.665710  | -5.893458 | -1.333827 | H            | 4.213342  | 0.717275  | 0.532252  |
| C  | 3.164422  | -4.795341 | 0.458319  | C            | 4.414057  | -0.685716 | 2.157627  |
| H  | 3.717170  | -5.468620 | 1.118482  | H            | 5.482756  | -0.832515 | 1.983536  |
| C  | 2.493662  | -3.697653 | 0.991714  | C            | 3.769281  | -1.380585 | 3.179615  |
| H  | 2.530260  | -3.510555 | 2.069854  | H            | 4.332138  | -2.069607 | 3.813986  |
| Ni | -0.263209 | -0.207886 | -0.602200 | C            | 2.400251  | -1.201152 | 3.383174  |
| O  | -0.317488 | 1.541835  | -1.671328 | H            | 1.883690  | -1.748030 | 4.176250  |
| C  | -0.310205 | 2.819634  | -1.205624 | C            | 1.682938  | -0.328846 | 2.570125  |
| C  | -1.303569 | 3.670853  | -1.705745 | H            | 0.603476  | -0.215154 | 2.724004  |
| H  | -2.007932 | 3.269324  | -2.437480 | C            | 2.483826  | 2.459471  | -0.469836 |
| C  | -1.384340 | 4.987756  | -1.266593 | C            | 2.614604  | 2.288639  | -1.854356 |
| H  | -2.165096 | 5.641990  | -1.663232 | H            | 2.016142  | 1.520266  | -2.355576 |
| C  | -0.472260 | 5.469707  | -0.325849 | C            | 3.521493  | 3.070807  | -2.570732 |
| H  | -0.528575 | 6.504439  | 0.020032  | H            | 3.621592  | 2.931202  | -3.649806 |
| C  | 0.510082  | 4.617124  | 0.174159  | C            | 4.296284  | 4.024344  | -1.913979 |
| H  | 1.223831  | 4.981780  | 0.919472  | H            | 5.004891  | 4.636495  | -2.477472 |
| C  | 0.605245  | 3.287176  | -0.246279 | C            | 4.172116  | 4.196275  | -0.533710 |
| C  | 1.628146  | 2.339336  | 0.296097  | H            | 4.784218  | 4.939018  | -0.016249 |
| H  | 1.095935  | 1.425747  | 0.636260  | C            | 3.271530  | 3.416673  | 0.186631  |
| H  | 2.136052  | 2.772329  | 1.169400  | H            | 3.192411  | 3.544725  | 1.270780  |
| C  | 2.630908  | 1.925916  | -0.740600 | C            | -2.167531 | 0.310377  | 1.942124  |
| C  | 3.960254  | 2.351246  | -0.671643 | C            | -2.170110 | 0.901948  | 3.212976  |
| H  | 4.262690  | 3.001019  | 0.155164  | H            | -1.977555 | 1.971768  | 3.328704  |
| C  | 4.901978  | 1.940336  | -1.613274 | C            | -2.420975 | 0.133338  | 4.349629  |
| H  | 5.938322  | 2.277607  | -1.530824 | H            | -2.413823 | 0.606837  | 5.334400  |
| C  | 4.519609  | 1.093476  | -2.654741 | C            | -2.679893 | -1.231203 | 4.231254  |
| H  | 5.252163  | 0.765541  | -3.396209 | H            | -2.872519 | -1.831039 | 5.123867  |
| C  | 3.199253  | 0.669493  | -2.748296 | C            | -2.698227 | -1.826443 | 2.969303  |

|                 |           |           |           |   |           |           |           |
|-----------------|-----------|-----------|-----------|---|-----------|-----------|-----------|
| H               | -2.908730 | -2.893797 | 2.865783  | P | -1.532791 | 0.585128  | 1.047837  |
| C               | -2.438859 | -1.062247 | 1.835142  | C | 0.706984  | 1.679502  | 2.186601  |
| H               | -2.444807 | -1.537231 | 0.848770  | H | 0.790433  | 0.803005  | 2.850546  |
| C               | -3.356802 | 1.733991  | -0.292522 | H | 1.250569  | 2.508908  | 2.666684  |
| C               | -3.351490 | 2.361730  | -1.547466 | C | -0.755544 | 2.018354  | 1.935647  |
| H               | -2.408125 | 2.501639  | -2.082827 | H | -0.832433 | 2.916978  | 1.301406  |
| C               | -4.544894 | 2.790535  | -2.121490 | H | -1.293294 | 2.240934  | 2.870076  |
| H               | -4.530297 | 3.278820  | -3.098700 | C | 3.165334  | 0.670093  | 0.913468  |
| C               | -5.755779 | 2.581845  | -1.460426 | C | 4.063519  | 0.603007  | -0.162002 |
| H               | -6.691963 | 2.912883  | -1.916554 | H | 3.750274  | 0.930311  | -1.158370 |
| C               | -5.769771 | 1.943347  | -0.221661 | C | 5.351118  | 0.110501  | 0.026893  |
| H               | -6.715767 | 1.772854  | 0.298060  | H | 6.040242  | 0.059475  | -0.819170 |
| C               | -4.576772 | 1.518866  | 0.361115  | C | 5.754606  | -0.327025 | 1.288881  |
| H               | -4.600644 | 1.018815  | 1.333297  | H | 6.763998  | -0.718744 | 1.435649  |
| Ni              | -0.251045 | 0.236073  | -0.766894 | C | 4.864642  | -0.269857 | 2.360336  |
| O               | 1.033831  | -0.550285 | -1.980047 | H | 5.173758  | -0.616889 | 3.349157  |
| C               | 1.961413  | -1.364123 | -1.540324 | C | 3.573175  | 0.222306  | 2.175612  |
| C               | 3.254549  | -1.344999 | -2.118211 | H | 2.882744  | 0.243569  | 3.022221  |
| H               | 3.436494  | -0.639299 | -2.933719 | C | 1.686014  | 2.835572  | -0.258925 |
| C               | 4.259343  | -2.196997 | -1.674780 | C | 0.909003  | 3.151967  | -1.379037 |
| H               | 5.245878  | -2.155475 | -2.146935 | H | 0.203616  | 2.406345  | -1.763135 |
| C               | 4.019830  | -3.098782 | -0.635266 | C | 1.038324  | 4.393872  | -2.001088 |
| H               | 4.809196  | -3.765039 | -0.279122 | H | 0.431483  | 4.628642  | -2.878767 |
| C               | 2.749914  | -3.135839 | -0.057933 | C | 1.949120  | 5.327198  | -1.509406 |
| H               | 2.546323  | -3.839331 | 0.757735  | H | 2.056976  | 6.297448  | -2.000280 |
| C               | 1.720695  | -2.294963 | -0.485156 | C | 2.730560  | 5.018984  | -0.394088 |
| C               | 0.355710  | -2.365686 | 0.142402  | H | 3.448695  | 5.747453  | -0.010037 |
| H               | 0.019940  | -1.354102 | 0.462366  | C | 2.601554  | 3.780699  | 0.228338  |
| H               | 0.424298  | -2.950383 | 1.073483  | H | 3.224684  | 3.541749  | 1.096116  |
| C               | -0.695535 | -2.995049 | -0.739964 | C | -2.141608 | -0.452090 | 2.430327  |
| C               | -0.841913 | -4.388531 | -0.682849 | C | -3.248452 | -0.072109 | 3.206783  |
| H               | -0.201462 | -4.954011 | 0.001240  | H | -3.800825 | 0.842529  | 2.967601  |
| C               | -1.769701 | -5.062522 | -1.469194 | C | -3.652730 | -0.860101 | 4.281021  |
| H               | -1.859614 | -6.149206 | -1.394156 | H | -4.517690 | -0.561681 | 4.878768  |
| C               | -2.582750 | -4.347047 | -2.350121 | C | -2.954486 | -2.028762 | 4.594384  |
| H               | -3.313808 | -4.865998 | -2.975107 | H | -3.274114 | -2.645355 | 5.438400  |
| C               | -2.450749 | -2.968061 | -2.425635 | C | -1.853053 | -2.405884 | 3.830073  |
| H               | -3.069219 | -2.379288 | -3.107622 | H | -1.303411 | -3.319072 | 4.072015  |
| C               | -1.518784 | -2.274863 | -1.633769 | C | -1.444684 | -1.625680 | 2.746454  |
| C               | -1.490664 | -0.780433 | -1.790343 | H | -0.576414 | -1.916215 | 2.140716  |
| O               | -2.133312 | -0.237278 | -2.665001 | C | -3.048629 | 1.208306  | 0.253530  |
|                 |           |           |           | C | -3.145778 | 2.508292  | -0.262484 |
| <b>5-ts(L2)</b> |           |           |           | H | -2.337962 | 3.229080  | -0.108195 |
| P               | 1.470150  | 1.219689  | 0.571616  | C | -4.270567 | 2.898212  | -0.989109 |

|              |           |           |           |   |           |           |           |
|--------------|-----------|-----------|-----------|---|-----------|-----------|-----------|
| H            | -4.333601 | 3.916905  | -1.379524 | C | 2.855906  | -1.643631 | 0.224576  |
| C            | -5.309220 | 1.996272  | -1.214833 | C | 4.091088  | -0.982767 | 0.157624  |
| H            | -6.188763 | 2.303306  | -1.785675 | H | 4.208384  | 0.005182  | 0.612726  |
| C            | -5.217048 | 0.697841  | -0.713510 | C | 5.166088  | -1.563216 | -0.511017 |
| H            | -6.021538 | -0.019467 | -0.892719 | H | 6.120599  | -1.033668 | -0.557854 |
| C            | -4.095377 | 0.304874  | 0.010887  | C | 5.020639  | -2.802432 | -1.134020 |
| H            | -4.028103 | -0.722382 | 0.383590  | H | 5.863595  | -3.253803 | -1.662633 |
| Ni           | 0.074795  | -0.211896 | -0.338309 | C | 3.790353  | -3.457402 | -1.091367 |
| O            | 0.930160  | -1.771008 | 0.788604  | H | 3.663384  | -4.421523 | -1.589577 |
| C            | 1.528829  | -2.595689 | -0.031037 | C | 2.713621  | -2.880397 | -0.422181 |
| C            | 2.937292  | -2.759222 | -0.036416 | H | 1.747337  | -3.394162 | -0.430991 |
| H            | 3.519591  | -2.200774 | 0.702225  | C | 2.018477  | 0.174852  | 2.343963  |
| C            | 3.571843  | -3.574481 | -0.967188 | C | 1.336871  | 1.355067  | 2.665893  |
| H            | 4.664310  | -3.652304 | -0.953588 | H | 0.509927  | 1.690829  | 2.026676  |
| C            | 2.834592  | -4.287135 | -1.916268 | C | 1.711769  | 2.092241  | 3.790497  |
| H            | 3.333525  | -4.925887 | -2.649029 | H | 1.174256  | 3.012348  | 4.033662  |
| C            | 1.442309  | -4.179114 | -1.899405 | C | 2.765307  | 1.663283  | 4.593505  |
| H            | 0.845700  | -4.750622 | -2.620413 | H | 3.060324  | 2.245925  | 5.469847  |
| C            | 0.781999  | -3.365399 | -0.979050 | C | 3.444596  | 0.484342  | 4.278886  |
| C            | -0.719725 | -3.299469 | -0.922457 | H | 4.269637  | 0.142159  | 4.908671  |
| H            | -1.001360 | -3.057546 | 0.118788  | C | 3.071609  | -0.261996 | 3.163735  |
| H            | -1.144883 | -4.291942 | -1.136257 | H | 3.604006  | -1.189913 | 2.932276  |
| C            | -1.412255 | -2.298472 | -1.809457 | C | -2.074281 | -2.631758 | -0.403654 |
| C            | -2.537523 | -2.696202 | -2.545876 | C | -2.015603 | -3.908588 | 0.171798  |
| H            | -2.846322 | -3.745293 | -2.499782 | H | -1.738215 | -4.035263 | 1.221115  |
| C            | -3.267747 | -1.797702 | -3.321082 | C | -2.316470 | -5.041696 | -0.584070 |
| H            | -4.132333 | -2.148862 | -3.890336 | H | -2.260974 | -6.029142 | -0.119776 |
| C            | -2.891706 | -0.455989 | -3.373606 | C | -2.689525 | -4.916633 | -1.920533 |
| H            | -3.457221 | 0.260212  | -3.974875 | H | -2.924316 | -5.805479 | -2.510577 |
| C            | -1.780236 | -0.037300 | -2.650757 | C | -2.763622 | -3.650519 | -2.500943 |
| H            | -1.463385 | 1.009454  | -2.708180 | H | -3.061224 | -3.539934 | -3.546135 |
| C            | -1.037735 | -0.936474 | -1.867597 | C | -2.450625 | -2.520292 | -1.751554 |
| C            | 0.718199  | -0.415078 | -1.932944 | H | -2.521001 | -1.535284 | -2.220107 |
| O            | 1.378456  | -0.460513 | -2.897911 | C | -3.267589 | -0.394208 | 1.016554  |
|              |           |           |           | C | -3.271493 | 0.635616  | 1.972059  |
| <b>6(L2)</b> |           |           |           | H | -2.329599 | 1.008753  | 2.377466  |
| P            | 1.397433  | -0.826062 | 0.942795  | C | -4.473062 | 1.209103  | 2.377244  |
| P            | -1.666282 | -1.105161 | 0.518741  | H | -4.462853 | 2.009802  | 3.120487  |
| C            | 0.488894  | -2.170442 | 1.844316  | C | -5.680521 | 0.778867  | 1.826985  |
| H            | 0.494054  | -3.078426 | 1.221630  | H | -6.620903 | 1.237301  | 2.142366  |
| H            | 1.015086  | -2.422383 | 2.777990  | C | -5.682666 | -0.235698 | 0.871844  |
| C            | -0.928122 | -1.695996 | 2.098816  | H | -6.623944 | -0.580950 | 0.437755  |
| H            | -0.933555 | -0.832169 | 2.783811  | C | -4.483935 | -0.822070 | 0.468217  |
| H            | -1.560390 | -2.461522 | 2.574509  | H | -4.507091 | -1.624270 | -0.273463 |

|               |           |           |           |    |           |           |           |
|---------------|-----------|-----------|-----------|----|-----------|-----------|-----------|
| Ni            | -0.057598 | 0.181369  | -0.466683 | C  | -4.495923 | 2.686344  | -1.872243 |
| O             | -0.885131 | 1.798839  | 0.562194  | H  | -4.503208 | 3.602328  | -2.467444 |
| C             | -1.224724 | 2.742106  | -0.283233 | C  | -3.386366 | 2.384177  | -1.086191 |
| C             | -2.569147 | 2.956803  | -0.676676 | H  | -2.531998 | 3.067040  | -1.084265 |
| H             | -3.341302 | 2.307771  | -0.253249 | C  | -2.447077 | -0.288342 | 1.965850  |
| C             | -2.906059 | 3.953984  | -1.587382 | C  | -1.976506 | -1.595703 | 2.121540  |
| H             | -3.954665 | 4.090586  | -1.870890 | H  | -1.273451 | -2.002874 | 1.393656  |
| C             | -1.922225 | 4.774686  | -2.142310 | C  | -2.409834 | -2.380455 | 3.190579  |
| H             | -2.186375 | 5.558572  | -2.856322 | H  | -2.035491 | -3.401141 | 3.297851  |
| C             | -0.591001 | 4.578140  | -1.765779 | C  | -3.318711 | -1.864559 | 4.111295  |
| H             | 0.193091  | 5.214393  | -2.193055 | H  | -3.656763 | -2.478046 | 4.949944  |
| C             | -0.228801 | 3.591558  | -0.849906 | C  | -3.803809 | -0.564193 | 3.957270  |
| C             | 1.200920  | 3.358798  | -0.451187 | H  | -4.524732 | -0.159853 | 4.671798  |
| H             | 1.225919  | 3.049672  | 0.605402  | C  | -3.373778 | 0.219819  | 2.890728  |
| H             | 1.763301  | 4.302046  | -0.515864 | H  | -3.772230 | 1.231998  | 2.770967  |
| C             | 1.916934  | 2.324943  | -1.290290 | C  | 2.198227  | 2.674027  | 0.214416  |
| C             | 3.050153  | 2.730825  | -2.016557 | C  | 2.714170  | 3.671011  | 1.054378  |
| H             | 3.386083  | 3.768093  | -1.910756 | H  | 2.492512  | 3.662859  | 2.125678  |
| C             | 3.739249  | 1.868532  | -2.865619 | C  | 3.529775  | 4.673502  | 0.534403  |
| H             | 4.611461  | 2.226230  | -3.419153 | H  | 3.925194  | 5.448143  | 1.195967  |
| C             | 3.290773  | 0.559744  | -3.017094 | C  | 3.847491  | 4.682756  | -0.824245 |
| H             | 3.800165  | -0.133579 | -3.692481 | H  | 4.491191  | 5.467821  | -1.228586 |
| C             | 2.178226  | 0.133985  | -2.292097 | C  | 3.351197  | 3.684927  | -1.661603 |
| H             | 1.835424  | -0.899152 | -2.416899 | H  | 3.607767  | 3.681234  | -2.723527 |
| C             | 1.497830  | 0.985372  | -1.411797 | C  | 2.526835  | 2.684420  | -1.148478 |
| C             | -0.745814 | 0.283479  | -2.105345 | H  | 2.159650  | 1.879524  | -1.792860 |
| O             | -1.147153 | 0.495092  | -3.163935 | C  | 2.314095  | 0.214270  | 1.711620  |
|               |           |           |           | C  | 1.878988  | -0.643230 | 2.733866  |
| <b>10(L2)</b> |           |           |           | H  | 0.851247  | -0.586990 | 3.107003  |
| P             | -1.848945 | 0.757290  | 0.590848  | C  | 2.745382  | -1.591797 | 3.272002  |
| P             | 1.152241  | 1.319901  | 0.851808  | H  | 2.395912  | -2.249402 | 4.071806  |
| C             | -1.316449 | 2.306502  | 1.454925  | C  | 4.047128  | -1.711655 | 2.784601  |
| H             | -1.232418 | 3.091945  | 0.686045  | H  | 4.720414  | -2.465313 | 3.199550  |
| H             | -2.080882 | 2.645087  | 2.171942  | C  | 4.480680  | -0.875956 | 1.756944  |
| C             | 0.031876  | 2.067138  | 2.116795  | H  | 5.490693  | -0.977451 | 1.352960  |
| H             | -0.068656 | 1.359527  | 2.955033  | C  | 3.621548  | 0.080449  | 1.222583  |
| H             | 0.444140  | 2.993473  | 2.543569  | H  | 3.966662  | 0.720451  | 0.405851  |
| C             | -3.361579 | 1.214615  | -0.311434 | Ni | -0.133973 | 0.174286  | -0.655909 |
| C             | -4.461527 | 0.346511  | -0.353399 | O  | 1.530686  | -0.346780 | -1.525792 |
| H             | -4.450327 | -0.580839 | 0.226134  | C  | 2.278871  | -1.420916 | -1.517097 |
| C             | -5.568213 | 0.651407  | -1.143239 | C  | 3.516214  | -1.390820 | -2.208392 |
| H             | -6.417486 | -0.035286 | -1.169249 | H  | 3.778414  | -0.470445 | -2.738795 |
| C             | -5.588177 | 1.819902  | -1.903759 | C  | 4.374894  | -2.483661 | -2.212903 |
| H             | -6.455415 | 2.055196  | -2.525075 | H  | 5.323303  | -2.417570 | -2.755501 |



|                  |           |           |           |    |           |           |           |
|------------------|-----------|-----------|-----------|----|-----------|-----------|-----------|
| C                | 4.037773  | -3.656541 | -1.533667 | C  | 3.624588  | 3.788530  | -1.236315 |
| H                | 4.709265  | -4.518290 | -1.534008 | H  | 3.783825  | 4.053938  | -2.284140 |
| C                | 2.815940  | -3.707717 | -0.860264 | C  | 4.319653  | 4.456327  | -0.230169 |
| H                | 2.531075  | -4.618994 | -0.321910 | H  | 5.025042  | 5.250672  | -0.486202 |
| C                | 1.936879  | -2.624207 | -0.834609 | C  | 4.116706  | 4.108052  | 1.106724  |
| C                | 0.626058  | -2.697720 | -0.106893 | H  | 4.665146  | 4.626731  | 1.896927  |
| H                | 0.582861  | -1.859636 | 0.614049  | C  | 3.220438  | 3.094898  | 1.435771  |
| H                | 0.586205  | -3.628259 | 0.482100  | H  | 3.086883  | 2.813438  | 2.485306  |
| C                | -0.572365 | -2.601773 | -1.020602 | C  | -2.420151 | -0.454013 | 2.026872  |
| C                | -1.129932 | -3.762403 | -1.573490 | C  | -3.499904 | -0.042866 | 2.826207  |
| H                | -0.700949 | -4.735275 | -1.307793 | H  | -3.978173 | 0.924804  | 2.643077  |
| C                | -2.207759 | -3.695900 | -2.454841 | C  | -3.974174 | -0.859487 | 3.848920  |
| H                | -2.633129 | -4.612747 | -2.871649 | H  | -4.813292 | -0.525901 | 4.464510  |
| C                | -2.729946 | -2.453092 | -2.806670 | C  | -3.384100 | -2.102952 | 4.086394  |
| H                | -3.567851 | -2.382631 | -3.506644 | H  | -3.760596 | -2.743903 | 4.887347  |
| C                | -2.175869 | -1.288649 | -2.267503 | C  | -2.320221 | -2.524991 | 3.293901  |
| H                | -2.594600 | -0.322809 | -2.573452 | H  | -1.857593 | -3.500142 | 3.465283  |
| C                | -1.106639 | -1.344606 | -1.368310 | C  | -1.845226 | -1.705104 | 2.269665  |
| C                | -0.446789 | 1.473318  | -2.122695 | H  | -1.016121 | -2.044153 | 1.647286  |
| O                | -0.447654 | 1.623297  | -3.262101 | C  | -3.302224 | 1.245965  | -0.058011 |
|                  |           |           |           | C  | -3.598593 | 2.602287  | -0.247995 |
| <b>11-ts(L2)</b> |           |           |           | H  | -2.934114 | 3.376248  | 0.144676  |
| P                | 1.342416  | 1.057787  | 0.797067  | C  | -4.746867 | 2.981821  | -0.942925 |
| P                | -1.758366 | 0.649309  | 0.704063  | H  | -4.967724 | 4.043397  | -1.079146 |
| C                | 0.297721  | 1.678835  | 2.204429  | C  | -5.608221 | 2.015954  | -1.460823 |
| H                | 0.224357  | 0.879763  | 2.959822  | H  | -6.503743 | 2.316923  | -2.009688 |
| H                | 0.789400  | 2.526954  | 2.704799  | C  | -5.318002 | 0.662991  | -1.280465 |
| C                | -1.087406 | 2.058747  | 1.698053  | H  | -5.983227 | -0.102001 | -1.688926 |
| H                | -1.017260 | 2.933381  | 1.030770  | C  | -4.174160 | 0.280056  | -0.586376 |
| H                | -1.763774 | 2.333521  | 2.523787  | H  | -3.950131 | -0.784101 | -0.456980 |
| C                | 2.440178  | -0.196567 | 1.548150  | Ni | -0.149482 | 0.445674  | -0.837893 |
| C                | 3.772532  | -0.318738 | 1.122181  | O  | 0.839940  | -0.584024 | -2.269593 |
| H                | 4.185133  | 0.400669  | 0.408944  | C  | 1.824380  | -1.464056 | -2.034799 |
| C                | 4.576108  | -1.353821 | 1.592316  | C  | 3.026007  | -1.294059 | -2.746778 |
| H                | 5.609694  | -1.432454 | 1.246315  | H  | 3.098404  | -0.461819 | -3.450821 |
| C                | 4.064992  | -2.289591 | 2.491893  | C  | 4.090404  | -2.167255 | -2.549792 |
| H                | 4.697250  | -3.101580 | 2.859306  | H  | 5.019944  | -2.013272 | -3.104899 |
| C                | 2.739961  | -2.186393 | 2.913167  | C  | 3.973832  | -3.233726 | -1.656140 |
| H                | 2.328357  | -2.915623 | 3.615872  | H  | 4.807706  | -3.922304 | -1.500772 |
| C                | 1.931887  | -1.153402 | 2.441789  | C  | 2.776172  | -3.414937 | -0.967888 |
| H                | 0.891083  | -1.098848 | 2.775470  | H  | 2.669352  | -4.249207 | -0.266917 |
| C                | 2.507108  | 2.424726  | 0.430615  | C  | 1.696756  | -2.544565 | -1.135026 |
| C                | 2.719642  | 2.779360  | -0.906818 | C  | 0.408863  | -2.703030 | -0.386724 |
| H                | 2.172637  | 2.251012  | -1.695137 | H  | 0.412460  | -1.979528 | 0.453288  |

|               |           |           |           |              |           |           |           |
|---------------|-----------|-----------|-----------|--------------|-----------|-----------|-----------|
| H             | 0.339962  | -3.705506 | 0.061199  | H            | -3.270147 | 1.547368  | -1.978222 |
| C             | -0.763973 | -2.421335 | -1.276286 | C            | 2.034708  | -1.804118 | -0.353291 |
| C             | -1.748854 | -3.362612 | -1.571629 | C            | 2.908466  | -2.209262 | -1.371666 |
| H             | -1.704780 | -4.338281 | -1.075965 | H            | 3.359096  | -1.464267 | -2.035552 |
| C             | -2.761718 | -3.089983 | -2.496666 | C            | 3.212531  | -3.558771 | -1.538095 |
| H             | -3.522469 | -3.841927 | -2.716905 | H            | 3.897932  | -3.867980 | -2.331316 |
| C             | -2.762724 | -1.862492 | -3.164497 | C            | 2.641648  | -4.515904 | -0.696310 |
| H             | -3.533510 | -1.641383 | -3.908798 | H            | 2.881295  | -5.573652 | -0.831370 |
| C             | -1.793333 | -0.899951 | -2.890961 | C            | 1.769839  | -4.121680 | 0.317315  |
| H             | -1.797158 | 0.058392  | -3.416786 | H            | 1.323937  | -4.867061 | 0.980281  |
| C             | -0.852836 | -1.150068 | -1.880206 | C            | 1.472276  | -2.770848 | 0.490459  |
| C             | -0.537281 | 1.971956  | -1.752764 | H            | 0.792874  | -2.437823 | 1.286666  |
| O             | -0.845692 | 3.008987  | -2.161634 | C            | 3.042690  | 0.911289  | -0.264686 |
|               |           |           |           | C            | 3.012840  | 2.216379  | -0.780263 |
| <b>12(L2)</b> |           |           |           | H            | 2.079407  | 2.637863  | -1.164345 |
| P             | -1.556152 | -0.045237 | -0.076822 | C            | 4.165763  | 2.999060  | -0.804769 |
| P             | 1.506507  | -0.064570 | -0.108946 | H            | 4.122034  | 4.011069  | -1.214979 |
| C             | -0.720898 | -0.434293 | -1.698726 | C            | 5.367816  | 2.496320  | -0.308394 |
| H             | -0.588794 | -1.528097 | -1.753863 | H            | 6.271214  | 3.110405  | -0.328053 |
| H             | -1.351483 | -0.143654 | -2.554883 | C            | 5.406622  | 1.205765  | 0.219303  |
| C             | 0.630339  | 0.257122  | -1.727688 | H            | 6.342325  | 0.803594  | 0.615776  |
| H             | 0.493552  | 1.346450  | -1.828736 | C            | 4.255901  | 0.421236  | 0.244832  |
| H             | 1.243285  | -0.067295 | -2.584127 | H            | 4.300863  | -0.587381 | 0.666514  |
| C             | -3.193941 | -0.838667 | -0.239865 | Ni           | -0.003178 | -0.080965 | 1.468815  |
| C             | -4.281777 | -0.308435 | 0.472624  | C            | 0.105069  | -0.187656 | 3.200766  |
| H             | -4.146679 | 0.598746  | 1.069750  | O            | 0.205396  | -0.272345 | 4.358830  |
| C             | -5.530079 | -0.921051 | 0.424171  |              |           |           |           |
| H             | -6.366737 | -0.487745 | 0.977991  | <b>2(L3)</b> |           |           |           |
| C             | -5.713451 | -2.083963 | -0.325774 | P            | -1.001962 | 1.595893  | -0.845390 |
| H             | -6.693450 | -2.565678 | -0.362484 | P            | -2.563787 | -0.922907 | 0.234430  |
| C             | -4.637712 | -2.628281 | -1.024398 | C            | -2.810072 | 1.431433  | -1.290271 |
| H             | -4.770951 | -3.539982 | -1.612182 | H            | -3.295033 | 2.419671  | -1.373368 |
| C             | -3.387391 | -2.011441 | -0.984107 | H            | -2.827653 | 1.010158  | -2.308323 |
| H             | -2.558803 | -2.455345 | -1.542432 | C            | -0.936607 | 3.192348  | 0.196166  |
| C             | -1.919674 | 1.740001  | -0.294936 | C            | -2.957160 | -2.352110 | -0.954652 |
| C             | -1.276736 | 2.637361  | 0.568610  | C            | -3.227151 | -1.322478 | 1.963006  |
| H             | -0.630706 | 2.232859  | 1.361450  | C            | -0.183214 | 1.916537  | -2.535501 |
| C             | -1.459427 | 4.012036  | 0.424858  | C            | -3.589176 | 0.516337  | -0.342257 |
| H             | -0.954233 | 4.703258  | 1.103840  | H            | -4.539637 | 0.191871  | -0.799684 |
| C             | -2.294827 | 4.499437  | -0.579698 | H            | -3.872227 | 1.066899  | 0.568869  |
| H             | -2.445511 | 5.576168  | -0.690379 | C            | 1.238283  | 2.409093  | -2.290483 |
| C             | -2.943997 | 3.612552  | -1.440604 | H            | 1.799429  | 2.428385  | -3.238852 |
| H             | -3.603012 | 3.994921  | -2.224189 | H            | 1.773049  | 1.731638  | -1.607242 |
| C             | -2.756067 | 2.238500  | -1.302353 | H            | 1.272921  | 3.426772  | -1.876857 |

|   |           |           |           |                 |           |           |           |
|---|-----------|-----------|-----------|-----------------|-----------|-----------|-----------|
| C | -0.100269 | 0.559105  | -3.234275 | Ni              | -0.470256 | -0.251991 | 0.125870  |
| H | 0.513980  | 0.648886  | -4.145032 | O               | 2.055114  | -0.851675 | -0.887122 |
| H | -1.087605 | 0.201831  | -3.560859 | C               | 3.255558  | -1.508694 | -0.865301 |
| H | 0.362490  | -0.209106 | -2.595212 | C               | 3.347322  | -2.857237 | -1.204842 |
| C | 0.413474  | 3.259203  | 0.906620  | H               | 2.433539  | -3.404973 | -1.445934 |
| H | 0.438348  | 4.126495  | 1.586829  | C               | 4.599726  | -3.471824 | -1.227810 |
| H | 1.262584  | 3.363933  | 0.219182  | H               | 4.679756  | -4.529304 | -1.492662 |
| H | 0.591840  | 2.359725  | 1.512679  | C               | 5.744877  | -2.741802 | -0.910968 |
| C | -2.710705 | -0.215528 | 2.883382  | H               | 6.724881  | -3.224866 | -0.929290 |
| H | -2.908804 | -0.479268 | 3.934763  | C               | 5.640531  | -1.391965 | -0.567838 |
| H | -3.211297 | 0.746782  | 2.701433  | H               | 6.538274  | -0.818410 | -0.318186 |
| H | -1.624902 | -0.064070 | 2.773828  | C               | 4.397085  | -0.760235 | -0.542666 |
| C | -2.014298 | 3.032659  | 1.265392  | C               | 4.181165  | 0.677756  | -0.173661 |
| H | -1.920590 | 3.832286  | 2.017855  | H               | 3.637078  | 1.170894  | -0.998477 |
| H | -1.907133 | 2.074022  | 1.792550  | H               | 5.145345  | 1.197780  | -0.085801 |
| H | -3.034633 | 3.095930  | 0.857972  | C               | 3.415203  | 0.831501  | 1.119261  |
| C | -1.192438 | 4.480649  | -0.574349 | C               | 3.966139  | 1.630301  | 2.129537  |
| H | -1.294132 | 5.318115  | 0.136105  | H               | 4.904096  | 2.155498  | 1.922335  |
| H | -2.122831 | 4.451018  | -1.161743 | C               | 3.374020  | 1.756278  | 3.383256  |
| H | -0.367768 | 4.744406  | -1.250561 | H               | 3.832003  | 2.390881  | 4.145907  |
| C | -4.747299 | -1.369570 | 2.080807  | C               | 2.211229  | 1.036095  | 3.657928  |
| H | -5.032570 | -1.463438 | 3.141983  | H               | 1.746050  | 1.090141  | 4.645757  |
| H | -5.201475 | -2.218513 | 1.556853  | C               | 1.644686  | 0.244605  | 2.668328  |
| H | -5.225077 | -0.450110 | 1.709837  | H               | 0.736035  | -0.327503 | 2.874199  |
| C | -0.936320 | 2.881040  | -3.447325 | C               | 2.200270  | 0.148625  | 1.377812  |
| H | -0.451343 | 2.899065  | -4.437528 | C               | 1.419902  | -0.631500 | 0.380857  |
| H | -0.944017 | 3.915257  | -3.084428 | O               | 0.651821  | -1.599441 | 0.792769  |
| H | -1.979539 | 2.576829  | -3.618653 |                 |           |           |           |
| C | -2.599944 | -2.640855 | 2.411703  | <b>3-ts(L3)</b> |           |           |           |
| H | -2.807242 | -2.811304 | 3.480403  | P               | -0.426483 | -1.911925 | 0.581417  |
| H | -1.506313 | -2.629887 | 2.283428  | P               | -2.439987 | 0.463709  | -0.114773 |
| H | -2.999499 | -3.508823 | 1.868879  | C               | -2.210212 | -2.056063 | 1.136889  |
| C | -4.304591 | -3.030182 | -0.746761 | H               | -2.542528 | -3.107381 | 1.091947  |
| H | -4.484565 | -3.751035 | -1.561871 | H               | -2.205790 | -1.798412 | 2.207020  |
| H | -5.143227 | -2.317512 | -0.762756 | C               | -0.243752 | -3.334996 | -0.687519 |
| H | -4.358216 | -3.600445 | 0.190630  | C               | -2.818991 | 1.686831  | 1.287715  |
| C | -2.918610 | -1.756305 | -2.359259 | C               | -3.410495 | 0.935812  | -1.675288 |
| H | -2.963034 | -2.561884 | -3.109590 | C               | 0.463714  | -2.440929 | 2.201766  |
| H | -1.981439 | -1.208382 | -2.527310 | C               | -3.193819 | -1.150080 | 0.396322  |
| H | -3.762306 | -1.079860 | -2.563482 | H               | -4.115193 | -1.007329 | 0.987381  |
| C | -1.818715 | -3.368191 | -0.851151 | H               | -3.515939 | -1.632623 | -0.540016 |
| H | -1.961631 | -4.166431 | -1.597682 | C               | 1.932454  | -2.711917 | 1.889153  |
| H | -1.754930 | -3.852142 | 0.132605  | H               | 2.506905  | -2.813625 | 2.824741  |
| H | -0.840501 | -2.898558 | -1.036745 | H               | 2.400365  | -1.905711 | 1.304798  |

|   |           |           |           |              |           |           |           |
|---|-----------|-----------|-----------|--------------|-----------|-----------|-----------|
| H | 2.071318  | -3.648669 | 1.331203  | H            | -0.789094 | 2.474021  | 1.186430  |
| C | 0.361116  | -1.269734 | 3.181294  | Ni           | -0.281039 | 0.027852  | -0.382374 |
| H | 1.014811  | -1.456794 | 4.048691  | O            | 0.817946  | 1.740699  | -0.901166 |
| H | -0.656907 | -1.154101 | 3.581375  | C            | 1.508236  | 2.634851  | -0.153576 |
| H | 0.661038  | -0.305532 | 2.748829  | C            | 1.280718  | 3.993899  | -0.416464 |
| C | 1.091866  | -3.187607 | -1.413407 | H            | 0.590278  | 4.256987  | -1.221257 |
| H | 1.213170  | -4.012980 | -2.134566 | C            | 1.919980  | 4.974523  | 0.334816  |
| H | 1.964030  | -3.212853 | -0.746126 | H            | 1.731377  | 6.029251  | 0.118156  |
| H | 1.124555  | -2.250138 | -1.982849 | C            | 2.800936  | 4.613082  | 1.355396  |
| C | -2.920636 | 0.003064  | -2.784262 | H            | 3.305959  | 5.378790  | 1.948652  |
| H | -3.350287 | 0.322166  | -3.747655 | C            | 3.033994  | 3.263078  | 1.609454  |
| H | -3.239709 | -1.038541 | -2.629463 | H            | 3.723357  | 2.967274  | 2.406577  |
| H | -1.824569 | 0.019257  | -2.883719 | C            | 2.395978  | 2.260663  | 0.873069  |
| C | -1.348873 | -3.103940 | -1.717069 | C            | 2.642842  | 0.804855  | 1.113220  |
| H | -1.198566 | -3.768525 | -2.583362 | H            | 1.656809  | 0.296252  | 1.175418  |
| H | -1.325552 | -2.069141 | -2.089029 | H            | 3.173299  | 0.649873  | 2.063720  |
| H | -2.354235 | -3.317702 | -1.321781 | C            | 3.388675  | 0.179012  | -0.025784 |
| C | -0.378129 | -4.744602 | -0.128167 | C            | 4.721927  | -0.219750 | 0.091388  |
| H | -0.456707 | -5.461126 | -0.963090 | H            | 5.237742  | -0.072692 | 1.045374  |
| H | -1.278383 | -4.881111 | 0.490299  | C            | 5.392676  | -0.811414 | -0.978564 |
| H | 0.495967  | -5.052673 | 0.461804  | H            | 6.433396  | -1.124586 | -0.862780 |
| C | -4.924660 | 0.791675  | -1.553129 | C            | 4.732791  | -1.002485 | -2.193375 |
| H | -5.391187 | 0.944572  | -2.540579 | H            | 5.254516  | -1.460973 | -3.037081 |
| H | -5.381211 | 1.520344  | -0.872991 | C            | 3.406751  | -0.607117 | -2.327563 |
| H | -5.224413 | -0.213499 | -1.219510 | H            | 2.866099  | -0.753365 | -3.265865 |
| C | -0.137873 | -3.654734 | 2.911970  | C            | 2.723324  | -0.016614 | -1.253619 |
| H | 0.347695  | -3.772707 | 3.895436  | C            | 1.288902  | 0.265284  | -1.424971 |
| H | 0.010360  | -4.599962 | 2.379858  | O            | 0.618178  | 0.037966  | -2.447105 |
| H | -1.213621 | -3.545007 | 3.112351  |              |           |           |           |
| C | -3.023118 | 2.362669  | -2.057924 | <b>4(L3)</b> |           |           |           |
| H | -3.424538 | 2.606702  | -3.054638 | P            | 0.378659  | 2.149141  | 0.147675  |
| H | -1.928789 | 2.479009  | -2.107238 | P            | 2.264730  | -0.460938 | 0.253890  |
| H | -3.418884 | 3.115536  | -1.361579 | C            | 2.030826  | 2.221653  | 1.007975  |
| C | -4.247697 | 2.207525  | 1.351125  | H            | 2.448356  | 3.240778  | 0.948727  |
| H | -4.379939 | 2.808605  | 2.266457  | H            | 1.803493  | 2.062776  | 2.072720  |
| H | -4.992906 | 1.398399  | 1.392468  | C            | 0.565158  | 3.416268  | -1.271650 |
| H | -4.501669 | 2.863120  | 0.506967  | C            | 2.499905  | -1.424043 | 1.867573  |
| C | -2.497911 | 0.950422  | 2.585368  | C            | 3.322555  | -1.234518 | -1.118798 |
| H | -2.505014 | 1.656750  | 3.430872  | C            | -0.754537 | 2.914762  | 1.487452  |
| H | -1.495495 | 0.501069  | 2.539219  | C            | 3.049233  | 1.186211  | 0.547422  |
| H | -3.226288 | 0.158751  | 2.818728  | H            | 3.890301  | 1.123556  | 1.258823  |
| C | -1.826404 | 2.841788  | 1.153267  | H            | 3.495732  | 1.490063  | -0.411305 |
| H | -1.952228 | 3.554413  | 1.984936  | C            | -2.057012 | 3.411489  | 0.866748  |
| H | -1.942125 | 3.408395  | 0.219238  | H            | -2.778998 | 3.639192  | 1.667510  |

|   |           |           |           |                 |           |           |           |
|---|-----------|-----------|-----------|-----------------|-----------|-----------|-----------|
| H | -2.530277 | 2.659183  | 0.219240  | H               | 1.906948  | -3.392422 | 1.052811  |
| H | -1.927014 | 4.336620  | 0.288403  | H               | 0.563884  | -2.413435 | 1.648689  |
| C | -1.090125 | 1.799559  | 2.473000  | Ni              | 0.104433  | 0.022855  | -0.417045 |
| H | -1.762203 | 2.186135  | 3.255779  | O               | -0.047305 | -1.813290 | -1.024376 |
| H | -0.199567 | 1.408977  | 2.986626  | C               | -0.821368 | -2.804080 | -0.674297 |
| H | -1.603942 | 0.963158  | 1.983775  | C               | -0.703806 | -4.041560 | -1.361187 |
| C | -0.660367 | 3.413160  | -2.186069 | H               | 0.004955  | -4.090603 | -2.192651 |
| H | -0.529616 | 4.194097  | -2.952691 | C               | -1.466315 | -5.148308 | -1.014716 |
| H | -1.601016 | 3.635225  | -1.667217 | H               | -1.346204 | -6.079293 | -1.577461 |
| H | -0.781095 | 2.458185  | -2.709644 | C               | -2.381512 | -5.080588 | 0.040006  |
| C | 2.831355  | -0.607723 | -2.424320 | H               | -2.982292 | -5.948970 | 0.319445  |
| H | 3.347838  | -1.076164 | -3.277595 | C               | -2.515706 | -3.874830 | 0.724828  |
| H | 3.056621  | 0.467170  | -2.473073 | H               | -3.232241 | -3.799992 | 1.551232  |
| H | 1.749400  | -0.749353 | -2.570810 | C               | -1.763168 | -2.742974 | 0.397470  |
| C | 1.752975  | 2.941143  | -2.105305 | C               | -1.962975 | -1.457938 | 1.153986  |
| H | 1.820440  | 3.541346  | -3.026554 | H               | -1.007793 | -0.887465 | 1.157249  |
| H | 1.628195  | 1.892344  | -2.410262 | H               | -2.199400 | -1.675391 | 2.207696  |
| H | 2.715962  | 3.050490  | -1.584507 | C               | -3.053726 | -0.596617 | 0.572338  |
| C | 0.830733  | 4.841453  | -0.798091 | C               | -4.312962 | -0.549375 | 1.182469  |
| H | 1.109725  | 5.458183  | -1.668061 | H               | -4.467739 | -1.095004 | 2.118633  |
| H | 1.659641  | 4.921545  | -0.079733 | C               | -5.367582 | 0.167340  | 0.620452  |
| H | -0.056931 | 5.314153  | -0.356309 | H               | -6.335809 | 0.195417  | 1.126957  |
| C | 4.816835  | -0.951774 | -0.974354 | C               | -5.189850 | 0.836120  | -0.591321 |
| H | 5.350393  | -1.394434 | -1.831583 | H               | -6.017768 | 1.385245  | -1.046764 |
| H | 5.260873  | -1.386092 | -0.069635 | C               | -3.948552 | 0.795452  | -1.214489 |
| H | 5.054585  | 0.121949  | -0.984015 | H               | -3.778040 | 1.312619  | -2.163171 |
| C | -0.101786 | 4.050534  | 2.275870  | C               | -2.870326 | 0.108288  | -0.635430 |
| H | -0.827695 | 4.427193  | 3.014789  | C               | -1.547997 | 0.233341  | -1.321602 |
| H | 0.194802  | 4.908894  | 1.663412  | O               | -1.486230 | 0.395704  | -2.525691 |
| H | 0.776981  | 3.725601  | 2.849387  |                 |           |           |           |
| C | 3.086377  | -2.741027 | -1.192605 | <b>5-ts(L3)</b> |           |           |           |
| H | 3.555689  | -3.133119 | -2.109491 | P               | -0.480703 | 1.841912  | -0.798708 |
| H | 2.015715  | -2.981067 | -1.240053 | P               | -2.174356 | -0.794496 | 0.169784  |
| H | 3.538398  | -3.287078 | -0.353016 | C               | -2.249607 | 1.608666  | -1.311115 |
| C | 3.944799  | -1.800750 | 2.170953  | H               | -2.745344 | 2.583010  | -1.449147 |
| H | 4.006967  | -2.236390 | 3.181944  | H               | -2.182289 | 1.169965  | -2.317275 |
| H | 4.623361  | -0.933905 | 2.159201  | C               | -0.497076 | 3.375535  | 0.340921  |
| H | 4.342617  | -2.555777 | 1.480227  | C               | -2.533706 | -2.161388 | -1.092325 |
| C | 1.979446  | -0.527151 | 2.988835  | C               | -3.077798 | -1.174477 | 1.805254  |
| H | 1.955807  | -1.091911 | 3.934487  | C               | 0.278014  | 2.332456  | -2.481792 |
| H | 0.950360  | -0.191103 | 2.789571  | C               | -3.080986 | 0.704431  | -0.419626 |
| H | 2.614137  | 0.354816  | 3.161400  | H               | -4.016991 | 0.411114  | -0.924677 |
| C | 1.617026  | -2.671005 | 1.826252  | H               | -3.390091 | 1.245334  | 0.486583  |
| H | 1.671472  | -3.193292 | 2.794818  | C               | 1.619815  | 3.032344  | -2.276766 |

|   |           |           |           |              |           |           |           |
|---|-----------|-----------|-----------|--------------|-----------|-----------|-----------|
| H | 2.160588  | 3.073744  | -3.235386 | H            | -1.693582 | -4.084550 | -1.599299 |
| H | 2.277402  | 2.521961  | -1.559222 | H            | -1.878204 | -3.869924 | 0.143807  |
| H | 1.496064  | 4.070784  | -1.940211 | H            | -0.573181 | -3.017641 | -0.732546 |
| C | 0.481881  | 1.046906  | -3.282808 | Ni           | 0.037218  | -0.204134 | 0.286623  |
| H | 0.986386  | 1.287024  | -4.232344 | O            | 0.893744  | -1.378261 | -1.311705 |
| H | -0.475577 | 0.574398  | -3.549807 | C            | 1.992065  | -2.059151 | -1.141924 |
| H | 1.071096  | 0.288310  | -2.750664 | C            | 2.066306  | -3.450894 | -1.420176 |
| C | 0.918820  | 3.721475  | 0.811197  | H            | 1.175019  | -3.943597 | -1.820190 |
| H | 0.859179  | 4.348687  | 1.714861  | C            | 3.228127  | -4.181572 | -1.193991 |
| H | 1.479817  | 4.297519  | 0.066433  | H            | 3.236468  | -5.255206 | -1.409092 |
| H | 1.517673  | 2.841830  | 1.070235  | C            | 4.377307  | -3.563892 | -0.695239 |
| C | -2.532301 | -0.218328 | 2.863245  | H            | 5.288528  | -4.138244 | -0.511433 |
| H | -3.014435 | -0.426076 | 3.831678  | C            | 4.342871  | -2.188164 | -0.455735 |
| H | -2.737581 | 0.835545  | 2.626634  | H            | 5.244572  | -1.679100 | -0.093727 |
| H | -1.447306 | -0.333151 | 3.004507  | C            | 3.192714  | -1.433239 | -0.681007 |
| C | -1.330519 | 2.951820  | 1.550374  | C            | 3.177110  | 0.059173  | -0.498864 |
| H | -1.253648 | 3.708659  | 2.347105  | H            | 2.408440  | 0.460343  | -1.179570 |
| H | -0.984758 | 1.994340  | 1.966330  | H            | 4.144949  | 0.483233  | -0.809250 |
| H | -2.399434 | 2.858974  | 1.305094  | C            | 2.860730  | 0.545883  | 0.887141  |
| C | -1.121764 | 4.625857  | -0.269457 | C            | 3.848543  | 1.213122  | 1.626035  |
| H | -1.246171 | 5.384006  | 0.521200  | H            | 4.835313  | 1.352086  | 1.171830  |
| H | -2.119461 | 4.460093  | -0.702139 | C            | 3.605291  | 1.699243  | 2.909067  |
| H | -0.484155 | 5.084164  | -1.037032 | H            | 4.399056  | 2.210172  | 3.460026  |
| C | -4.589338 | -0.960592 | 1.705954  | C            | 2.351247  | 1.514776  | 3.486336  |
| H | -5.047970 | -1.200430 | 2.678658  | H            | 2.146202  | 1.871060  | 4.499321  |
| H | -5.076289 | -1.600955 | 0.961194  | C            | 1.356311  | 0.856207  | 2.763647  |
| H | -4.861517 | 0.080766  | 1.485336  | H            | 0.381587  | 0.699988  | 3.237257  |
| C | -0.631351 | 3.248548  | -3.304676 | C            | 1.577861  | 0.399232  | 1.457318  |
| H | -0.110999 | 3.504767  | -4.241923 | C            | 0.497970  | -1.406487 | 1.438457  |
| H | -0.879314 | 4.196403  | -2.812971 | O            | 0.809584  | -2.312904 | 2.089380  |
| H | -1.571872 | 2.763376  | -3.599505 |              |           |           |           |
| C | -2.796178 | -2.604587 | 2.258036  | <b>6(L3)</b> |           |           |           |
| H | -3.181294 | -2.743365 | 3.280663  | P            | 0.418959  | -1.850482 | -0.770973 |
| H | -1.723251 | -2.839040 | 2.287657  | P            | 2.221448  | 0.733739  | 0.131101  |
| H | -3.293543 | -3.355312 | 1.629994  | C            | 2.180816  | -1.676165 | -1.329569 |
| C | -3.989010 | -2.606287 | -1.156942 | H            | 2.639542  | -2.666795 | -1.477376 |
| H | -4.114509 | -3.299370 | -2.004983 | H            | 2.103266  | -1.237244 | -2.334860 |
| H | -4.687395 | -1.772665 | -1.327923 | C            | 0.414212  | -3.397793 | 0.353745  |
| H | -4.313363 | -3.150683 | -0.259661 | C            | 2.601842  | 2.081461  | -1.143215 |
| C | -2.122950 | -1.585145 | -2.447468 | C            | 3.167356  | 1.088343  | 1.751840  |
| H | -2.160318 | -2.382946 | -3.206330 | C            | -0.396329 | -2.297059 | -2.441957 |
| H | -1.087314 | -1.215764 | -2.420626 | C            | 3.062375  | -0.799767 | -0.460740 |
| H | -2.804291 | -0.792132 | -2.792820 | H            | 3.999468  | -0.544341 | -0.983678 |
| C | -1.619691 | -3.346079 | -0.784679 | H            | 3.365460  | -1.345261 | 0.444612  |

|   |           |           |           |               |           |           |           |
|---|-----------|-----------|-----------|---------------|-----------|-----------|-----------|
| C | -1.758644 | -2.949144 | -2.209260 | C             | 1.735625  | 3.297420  | -0.819853 |
| H | -2.338321 | -2.931829 | -3.145409 | H             | 1.836566  | 4.041960  | -1.626000 |
| H | -2.366797 | -2.449100 | -1.443892 | H             | 2.016511  | 3.799084  | 0.114369  |
| H | -1.659071 | -4.004471 | -1.919661 | H             | 0.678363  | 3.003220  | -0.771977 |
| C | -0.551957 | -0.999718 | -3.236825 | Ni            | -0.009677 | 0.206415  | 0.339540  |
| H | -1.119308 | -1.204338 | -4.158590 | O             | -0.863394 | 1.466171  | -1.224853 |
| H | 0.423063  | -0.601188 | -3.555830 | C             | -1.965885 | 2.141878  | -1.062484 |
| H | -1.057392 | -0.196727 | -2.683796 | C             | -2.024701 | 3.548270  | -1.262196 |
| C | -1.001249 | -3.731054 | 0.834974  | H             | -1.111180 | 4.061919  | -1.577103 |
| H | -0.937906 | -4.370231 | 1.729903  | C             | -3.198765 | 4.268583  | -1.067605 |
| H | -1.574872 | -4.292890 | 0.088949  | H             | -3.194962 | 5.352503  | -1.223297 |
| H | -1.588774 | -2.849625 | 1.111549  | C             | -4.375888 | 3.626379  | -0.676899 |
| C | 2.606129  | 0.155707  | 2.823522  | H             | -5.298400 | 4.191121  | -0.521370 |
| H | 3.126909  | 0.336578  | 3.777299  | C             | -4.351553 | 2.240762  | -0.501325 |
| H | 2.755526  | -0.905529 | 2.577197  | H             | -5.271401 | 1.715349  | -0.216727 |
| H | 1.532150  | 0.317478  | 3.000572  | C             | -3.188699 | 1.496919  | -0.694211 |
| C | 1.271480  | -3.006550 | 1.557435  | C             | -3.172435 | 0.000607  | -0.553604 |
| H | 1.202199  | -3.780511 | 2.338059  | H             | -2.390586 | -0.379738 | -1.227598 |
| H | 0.941244  | -2.056601 | 2.002002  | H             | -4.133446 | -0.418718 | -0.890901 |
| H | 2.336861  | -2.916860 | 1.296228  | C             | -2.877986 | -0.505304 | 0.831581  |
| C | 1.006691  | -4.652396 | -0.281073 | C             | -3.903348 | -1.106180 | 1.577701  |
| H | 1.124234  | -5.422249 | 0.499157  | H             | -4.894761 | -1.200878 | 1.121523  |
| H | 2.002189  | -4.504425 | -0.724889 | C             | -3.692599 | -1.576958 | 2.871978  |
| H | 0.348419  | -5.087516 | -1.044383 | H             | -4.513300 | -2.037914 | 3.427694  |
| C | 4.666791  | 0.811321  | 1.621088  | C             | -2.435356 | -1.436309 | 3.454131  |
| H | 5.157801  | 1.048108  | 2.578519  | H             | -2.254619 | -1.775283 | 4.477920  |
| H | 5.161137  | 1.419111  | 0.854085  | C             | -1.403626 | -0.846623 | 2.721591  |
| H | 4.892073  | -0.243469 | 1.412836  | H             | -0.424640 | -0.733065 | 3.199963  |
| C | 0.454318  | -3.247490 | -3.288692 | C             | -1.591304 | -0.417097 | 1.400539  |
| H | -0.095241 | -3.467126 | -4.218445 | C             | -0.327291 | 1.483187  | 1.480137  |
| H | 0.661272  | -4.211653 | -2.810792 | O             | -0.614294 | 2.401526  | 2.117051  |
| H | 1.413027  | -2.808214 | -3.596428 |               |           |           |           |
| C | 2.963192  | 2.530687  | 2.205982  | <b>10(L3)</b> |           |           |           |
| H | 3.384577  | 2.653535  | 3.216274  | P             | 2.184747  | 0.173546  | 0.274589  |
| H | 1.905244  | 2.817714  | 2.268312  | P             | -0.075762 | -2.151477 | 0.206462  |
| H | 3.476056  | 3.256183  | 1.560993  | C             | 2.490308  | -1.453172 | 1.124159  |
| C | 4.071022  | 2.473369  | -1.236514 | H             | 3.567096  | -1.689383 | 1.090061  |
| H | 4.203813  | 3.164496  | -2.084953 | H             | 2.266149  | -1.274387 | 2.185027  |
| H | 4.736446  | 1.616728  | -1.424249 | C             | 3.513889  | 0.146742  | -1.107556 |
| H | 4.432469  | 3.002334  | -0.344245 | C             | -1.017708 | -2.471844 | 1.836125  |
| C | 2.144571  | 1.515654  | -2.487696 | C             | -0.594759 | -3.491582 | -1.051766 |
| H | 2.193695  | 2.308987  | -3.250350 | C             | 2.730079  | 1.400115  | 1.642313  |
| H | 1.098281  | 1.180002  | -2.440627 | C             | 1.664975  | -2.621947 | 0.605648  |
| H | 2.790640  | 0.697696  | -2.842392 | H             | 1.706458  | -3.469969 | 1.310373  |

|   |           |           |           |                  |           |           |           |
|---|-----------|-----------|-----------|------------------|-----------|-----------|-----------|
| H | 2.091643  | -3.000153 | -0.335619 | H                | 0.680774  | -2.162568 | 3.198582  |
| C | 2.940447  | 2.795605  | 1.062101  | C                | -2.442811 | -1.925675 | 1.769647  |
| H | 3.181160  | 3.492945  | 1.880439  | H                | -2.960857 | -2.176650 | 2.709405  |
| H | 2.045601  | 3.184746  | 0.558574  | H                | -3.043096 | -2.335666 | 0.950196  |
| H | 3.781721  | 2.837805  | 0.355945  | H                | -2.464823 | -0.835134 | 1.670797  |
| C | 1.587181  | 1.449635  | 2.655142  | Ni               | -0.019137 | 0.137901  | -0.442341 |
| H | 1.759303  | 2.276000  | 3.362486  | O                | -1.929672 | -0.105460 | -0.723330 |
| H | 1.526128  | 0.531262  | 3.256788  | C                | -3.017291 | 0.547605  | -0.406190 |
| H | 0.614095  | 1.622712  | 2.179414  | C                | -4.201856 | 0.296530  | -1.142423 |
| C | 3.288980  | 1.273076  | -2.111605 | H                | -4.133246 | -0.387563 | -1.992964 |
| H | 4.125806  | 1.288749  | -2.827810 | C                | -5.410275 | 0.892078  | -0.801967 |
| H | 3.232547  | 2.268780  | -1.652293 | H                | -6.303843 | 0.669075  | -1.393174 |
| H | 2.375804  | 1.114652  | -2.700165 | C                | -5.489121 | 1.771918  | 0.279827  |
| C | -0.083467 | -3.080780 | -2.430460 | H                | -6.436562 | 2.244680  | 0.549256  |
| H | -0.255762 | -3.905403 | -3.140369 | C                | -4.329545 | 2.042239  | 1.008166  |
| H | 0.996400  | -2.868645 | -2.448778 | H                | -4.370679 | 2.737322  | 1.854638  |
| H | -0.616339 | -2.205774 | -2.821063 | C                | -3.105572 | 1.447756  | 0.697000  |
| C | 3.371134  | -1.182575 | -1.846960 | C                | -1.845640 | 1.802724  | 1.431269  |
| H | 3.965158  | -1.150572 | -2.773947 | H                | -1.286767 | 0.881528  | 1.674986  |
| H | 2.329723  | -1.381822 | -2.139198 | H                | -2.083104 | 2.312068  | 2.377970  |
| H | 3.747868  | -2.033981 | -1.261798 | C                | -0.997333 | 2.672729  | 0.540429  |
| C | 4.938249  | 0.239985  | -0.569445 | C                | -1.150510 | 4.065203  | 0.601685  |
| H | 5.640035  | 0.014699  | -1.388835 | H                | -1.792740 | 4.491360  | 1.380720  |
| H | 5.149402  | -0.481001 | 0.233424  | C                | -0.533906 | 4.902108  | -0.323942 |
| H | 5.191013  | 1.245932  | -0.209312 | H                | -0.662066 | 5.985874  | -0.260916 |
| C | -0.001690 | -4.864775 | -0.730326 | C                | 0.216812  | 4.333376  | -1.350241 |
| H | -0.373725 | -5.593373 | -1.468756 | H                | 0.677618  | 4.965289  | -2.115231 |
| H | -0.273933 | -5.250213 | 0.258148  | C                | 0.384783  | 2.947598  | -1.403954 |
| H | 1.095110  | -4.879277 | -0.807579 | H                | 0.977290  | 2.544233  | -2.227105 |
| C | 3.991430  | 0.981654  | 2.403444  | C                | -0.176026 | 2.091646  | -0.446309 |
| H | 4.091014  | 1.636614  | 3.283979  | C                | 0.150839  | 0.060504  | -2.448303 |
| H | 4.916640  | 1.095192  | 1.829093  | O                | -0.384952 | 0.408845  | -3.405781 |
| H | 3.952476  | -0.046111 | 2.790527  |                  |           |           |           |
| C | -2.117539 | -3.573305 | -1.131240 | <b>11-ts(L3)</b> |           |           |           |
| H | -2.401819 | -4.192883 | -1.996891 | P                | -2.056924 | -0.353091 | 0.454176  |
| H | -2.569245 | -2.580390 | -1.271660 | P                | -0.079760 | 2.219399  | 0.236298  |
| H | -2.571011 | -4.041252 | -0.247241 | C                | -2.465520 | 1.192735  | 1.409120  |
| C | -1.056124 | -3.940223 | 2.248269  | H                | -3.558864 | 1.336126  | 1.446771  |
| H | -1.463603 | -4.011311 | 3.270039  | H                | -2.168362 | 0.977883  | 2.446770  |
| H | -0.061053 | -4.408731 | 2.275618  | C                | -3.462505 | -0.417361 | -0.858054 |
| H | -1.708017 | -4.550802 | 1.609689  | C                | 1.074090  | 2.441993  | 1.739242  |
| C | -0.275043 | -1.694235 | 2.920350  | C                | 0.098174  | 3.731660  | -0.911344 |
| H | -0.887235 | -1.657011 | 3.835421  | C                | -2.444280 | -1.692377 | 1.772361  |
| H | -0.083785 | -0.655117 | 2.614447  | C                | -1.779948 | 2.469131  | 0.930359  |



|   |           |           |           |               |           |           |           |
|---|-----------|-----------|-----------|---------------|-----------|-----------|-----------|
| H | -1.762284 | 3.221328  | 1.737850  | H             | 0.198997  | 0.563633  | 2.435647  |
| H | -2.364167 | 2.929408  | 0.119167  | H             | -0.395457 | 1.997290  | 3.312291  |
| C | -2.508827 | -3.049756 | 1.077958  | C             | 2.439710  | 1.888950  | 1.345362  |
| H | -2.464380 | -3.859125 | 1.824850  | H             | 3.098380  | 1.816791  | 2.226378  |
| H | -1.669602 | -3.204841 | 0.383277  | H             | 2.960863  | 2.504351  | 0.599666  |
| H | -3.443962 | -3.188126 | 0.517378  | H             | 2.341913  | 0.883779  | 0.921125  |
| C | -1.273750 | -1.693637 | 2.753224  | Ni            | -0.068521 | -0.007944 | -0.650905 |
| H | -1.393329 | -2.523972 | 3.467985  | O             | 1.892132  | -0.660759 | -1.169168 |
| H | -1.225751 | -0.772133 | 3.352349  | C             | 3.087610  | -0.838469 | -0.601004 |
| H | -0.310097 | -1.831971 | 2.253356  | C             | 4.233880  | -0.423007 | -1.300837 |
| C | -3.147737 | -1.492961 | -1.895387 | H             | 4.109485  | 0.007332  | -2.297364 |
| H | -3.926347 | -1.491413 | -2.675406 | C             | 5.491048  | -0.549332 | -0.718352 |
| H | -3.119613 | -2.504571 | -1.470024 | H             | 6.373611  | -0.213006 | -1.269690 |
| H | -2.186462 | -1.325494 | -2.396928 | C             | 5.632837  | -1.108755 | 0.554578  |
| C | -0.781118 | 3.500265  | -2.139159 | H             | 6.621909  | -1.208359 | 1.007772  |
| H | -0.669566 | 4.352143  | -2.828959 | C             | 4.498525  | -1.541162 | 1.241059  |
| H | -1.852041 | 3.439272  | -1.894364 | H             | 4.595455  | -1.983339 | 2.237965  |
| H | -0.505036 | 2.600766  | -2.700896 | C             | 3.225873  | -1.408028 | 0.684517  |
| C | -3.482473 | 0.946813  | -1.547601 | C             | 1.954969  | -1.812172 | 1.361288  |
| H | -4.124620 | 0.903993  | -2.442057 | H             | 1.400552  | -0.899656 | 1.657840  |
| H | -2.485322 | 1.265549  | -1.881598 | H             | 2.151156  | -2.384139 | 2.279895  |
| H | -3.895436 | 1.734034  | -0.898585 | C             | 1.141843  | -2.604038 | 0.378888  |
| C | -4.856792 | -0.670667 | -0.296440 | C             | 0.986312  | -3.986248 | 0.495690  |
| H | -5.599558 | -0.515816 | -1.096587 | H             | 1.334113  | -4.471628 | 1.414163  |
| H | -5.126256 | 0.016674  | 0.519589  | C             | 0.442036  | -4.748461 | -0.538591 |
| H | -4.992097 | -1.701068 | 0.058073  | H             | 0.324111  | -5.828804 | -0.431012 |
| C | -0.342244 | 5.058050  | -0.293200 | C             | 0.110330  | -4.109594 | -1.737741 |
| H | -0.286381 | 5.848541  | -1.059711 | H             | -0.267029 | -4.690817 | -2.584304 |
| H | 0.278398  | 5.391913  | 0.544266  | C             | 0.260739  | -2.733966 | -1.881952 |
| H | -1.387865 | 5.034819  | 0.048523  | H             | 0.022731  | -2.266743 | -2.839435 |
| C | -3.708959 | -1.460512 | 2.599344  | C             | 0.666505  | -1.949305 | -0.782571 |
| H | -3.732813 | -2.196373 | 3.420469  | C             | -0.283800 | 0.209737  | -2.446870 |
| H | -4.642863 | -1.590340 | 2.043914  | O             | -0.369436 | 0.272588  | -3.599191 |
| H | -3.733468 | -0.469258 | 3.075135  |               |           |           |           |
| C | 1.553976  | 3.801390  | -1.365328 | <b>12(L3)</b> |           |           |           |
| H | 1.661705  | 4.527061  | -2.187203 | Ni            | 0.000672  | -0.055253 | 1.255963  |
| H | 1.912015  | 2.827507  | -1.738600 | P             | 1.602880  | -0.005880 | -0.263499 |
| H | 2.229451  | 4.127179  | -0.561919 | P             | -1.598114 | 0.041521  | -0.266541 |
| C | 1.219763  | 3.851910  | 2.291867  | C             | 0.741287  | -0.116478 | -1.924373 |
| H | 1.793403  | 3.814434  | 3.233175  | H             | 1.294861  | 0.434576  | -2.704444 |
| H | 0.253562  | 4.322038  | 2.530240  | H             | 0.819799  | -1.176786 | -2.211759 |
| H | 1.773616  | 4.517193  | 1.615780  | C             | 2.365654  | 1.735863  | -0.236328 |
| C | 0.487606  | 1.549160  | 2.831729  | C             | -2.364350 | -1.696113 | -0.403850 |
| H | 1.233645  | 1.381221  | 3.625151  | C             | -2.981206 | 1.346424  | -0.334576 |

|   |           |           |           |              |           |           |           |
|---|-----------|-----------|-----------|--------------|-----------|-----------|-----------|
| C | 2.986760  | -1.299044 | -0.453194 | C            | -1.195647 | -2.603016 | -0.783808 |
| C | -0.731118 | 0.306269  | -1.907063 | H            | -1.476072 | -3.662730 | -0.668144 |
| H | -1.279953 | -0.168497 | -2.739135 | H            | -0.334862 | -2.409078 | -0.123724 |
| H | -0.807276 | 1.389107  | -2.093723 | H            | -0.874250 | -2.467534 | -1.827553 |
| C | 4.013776  | -1.080931 | 0.654893  | C            | -2.837880 | -2.123165 | 0.986064  |
| H | 4.715359  | -1.930010 | 0.688677  | H            | -3.140525 | -3.183090 | 0.971371  |
| H | 3.536982  | -1.008465 | 1.644841  | H            | -3.697939 | -1.546915 | 1.349567  |
| H | 4.619055  | -0.176463 | 0.499990  | H            | -2.029314 | -2.007304 | 1.724422  |
| C | 2.337357  | -2.666030 | -0.236613 | C            | -0.012380 | -0.185271 | 2.984295  |
| H | 3.111825  | -3.450247 | -0.231134 | O            | -0.025775 | -0.286223 | 4.149532  |
| H | 1.629580  | -2.927185 | -1.037462 |              |           |           |           |
| H | 1.801814  | -2.721374 | 0.723966  | <b>2(L4)</b> |           |           |           |
| C | 2.812086  | 2.035625  | 1.195002  | P            | 2.433046  | -0.367490 | 0.188138  |
| H | 3.115457  | 3.091776  | 1.282271  | P            | -0.423365 | -0.286306 | 1.285749  |
| H | 3.663738  | 1.425582  | 1.522682  | C            | 2.216809  | -0.736226 | 1.992484  |
| H | 1.988010  | 1.852874  | 1.902304  | H            | 2.089165  | -1.826555 | 2.090427  |
| C | -2.335083 | 2.684348  | 0.025820  | H            | 3.111015  | -0.464059 | 2.575896  |
| H | -3.110319 | 3.462916  | 0.112698  | C            | 0.974690  | -0.018051 | 2.485134  |
| H | -1.626354 | 3.029834  | -0.741170 | H            | 1.145320  | 1.070917  | 2.519495  |
| H | -1.800107 | 2.638069  | 0.987239  | H            | 0.701262  | -0.318921 | 3.508203  |
| C | 1.199367  | 2.668752  | -0.555768 | C            | 3.931831  | -1.308801 | -0.267903 |
| H | 1.464948  | 3.713923  | -0.327520 | C            | 4.760453  | -0.830083 | -1.293035 |
| H | 0.324175  | 2.401873  | 0.057580  | H            | 4.573777  | 0.126256  | -1.786657 |
| H | 0.906117  | 2.634115  | -1.615858 | C            | 5.848720  | -1.593844 | -1.693396 |
| C | 3.500311  | 1.993339  | -1.215962 | C            | 6.150921  | -2.825065 | -1.123478 |
| H | 3.755297  | 3.066719  | -1.212735 | H            | 7.010529  | -3.409246 | -1.450946 |
| H | 3.234817  | 1.736447  | -2.253121 | C            | 5.305538  | -3.278219 | -0.119731 |
| H | 4.420953  | 1.453112  | -0.955041 | C            | 4.205470  | -2.551869 | 0.318939  |
| C | -3.658414 | 1.487501  | -1.695197 | H            | 3.587662  | -2.977038 | 1.111031  |
| H | -4.414058 | 2.289839  | -1.650892 | C            | 3.019861  | 1.374443  | 0.212867  |
| H | -4.182857 | 0.579809  | -2.018397 | C            | 2.211852  | 2.312711  | -0.436223 |
| H | -2.954507 | 1.769202  | -2.491693 | H            | 1.308214  | 1.995279  | -0.965710 |
| C | 3.673880  | -1.301245 | -1.816030 | C            | 2.571956  | 3.654764  | -0.403473 |
| H | 4.421366  | -2.111483 | -1.850180 | C            | 3.713008  | 4.096770  | 0.251698  |
| H | 4.209425  | -0.369324 | -2.035253 | H            | 3.985500  | 5.151927  | 0.270188  |
| H | 2.974017  | -1.488695 | -2.643461 | C            | 4.500799  | 3.137339  | 0.881677  |
| C | -4.018732 | 1.017636  | 0.735480  | C            | 4.180904  | 1.785149  | 0.879203  |
| H | -4.713497 | 1.864702  | 0.855933  | H            | 4.842794  | 1.077977  | 1.384697  |
| H | -3.553359 | 0.834720  | 1.716531  | C            | -1.242545 | -1.816804 | 1.877185  |
| H | -4.630122 | 0.141305  | 0.477578  | C            | -1.503953 | -2.082277 | 3.227452  |
| C | -3.482768 | -1.858964 | -1.422179 | H            | -1.273150 | -1.366223 | 4.019435  |
| H | -3.734588 | -2.927794 | -1.527678 | C            | -2.096569 | -3.292683 | 3.565814  |
| H | -3.200229 | -1.501459 | -2.424260 | C            | -2.438438 | -4.248241 | 2.615758  |
| H | -4.408909 | -1.346851 | -1.125587 | H            | -2.901021 | -5.191945 | 2.905066  |

|    |           |           |           |                 |           |           |           |
|----|-----------|-----------|-----------|-----------------|-----------|-----------|-----------|
| C  | -2.167731 | -3.954842 | 1.285213  | F               | -1.513324 | 4.686627  | 1.534121  |
| C  | -1.570190 | -2.760758 | 0.896597  | F               | -2.487547 | -4.856181 | 0.356301  |
| H  | -1.365152 | -2.564928 | -0.160636 | F               | -2.351317 | -3.553340 | 4.850633  |
| C  | -1.560203 | 1.072623  | 1.752301  |                 |           |           |           |
| C  | -1.103773 | 2.377359  | 1.512920  | <b>3-ts(L4)</b> |           |           |           |
| H  | -0.112590 | 2.575688  | 1.094398  | P               | 1.902800  | 0.690491  | 0.551192  |
| C  | -1.946038 | 3.446560  | 1.776304  | P               | -1.172880 | 0.945698  | 0.766587  |
| C  | -3.239505 | 3.277067  | 2.257738  | C               | 1.198397  | 0.952797  | 2.247071  |
| H  | -3.893325 | 4.128688  | 2.445475  | H               | 1.061834  | -0.045357 | 2.693695  |
| C  | -3.671330 | 1.973143  | 2.456099  | H               | 1.902224  | 1.494733  | 2.898410  |
| C  | -2.861770 | 0.867643  | 2.219212  | C               | -0.131298 | 1.684578  | 2.120341  |
| H  | -3.266789 | -0.131819 | 2.390569  | H               | 0.042057  | 2.731897  | 1.821460  |
| Ni | 0.406028  | -0.330669 | -0.663539 | H               | -0.673607 | 1.724945  | 3.078440  |
| O  | -1.560231 | -1.217752 | -2.463313 | C               | 3.132253  | -0.641762 | 0.742723  |
| C  | -2.859409 | -1.343519 | -2.871554 | C               | 4.400549  | -0.569497 | 0.153121  |
| C  | -3.098402 | -2.108983 | -4.014921 | H               | 4.769313  | 0.345237  | -0.315286 |
| H  | -2.243894 | -2.506731 | -4.565774 | C               | 5.206171  | -1.702867 | 0.152265  |
| C  | -4.406900 | -2.356726 | -4.423363 | C               | 4.802667  | -2.910955 | 0.706454  |
| H  | -4.588365 | -2.955848 | -5.319006 | H               | 5.448121  | -3.788701 | 0.689952  |
| C  | -5.477450 | -1.840102 | -3.695079 | C               | 3.536574  | -2.953628 | 1.278444  |
| H  | -6.505150 | -2.031318 | -4.012003 | C               | 2.694185  | -1.850890 | 1.306185  |
| C  | -5.229407 | -1.078128 | -2.553617 | H               | 1.701327  | -1.961170 | 1.750522  |
| H  | -6.063096 | -0.671406 | -1.973383 | C               | 2.867932  | 2.220130  | 0.254652  |
| C  | -3.926021 | -0.826521 | -2.121522 | C               | 2.484785  | 3.010459  | -0.833885 |
| C  | -3.609393 | 0.001110  | -0.913475 | H               | 1.666871  | 2.708767  | -1.494559 |
| H  | -2.936327 | -0.581785 | -0.256213 | C               | 3.168449  | 4.198219  | -1.074121 |
| H  | -4.520610 | 0.208479  | -0.335130 | C               | 4.217044  | 4.624815  | -0.270624 |
| C  | -2.926321 | 1.279724  | -1.299315 | H               | 4.744023  | 5.557296  | -0.474232 |
| C  | -3.537904 | 2.514356  | -1.075938 | C               | 4.570882  | 3.818425  | 0.806292  |
| H  | -4.526704 | 2.532983  | -0.606396 | C               | 3.918502  | 2.625447  | 1.088800  |
| C  | -2.910433 | 3.710281  | -1.421809 | H               | 4.241314  | 2.028941  | 1.945521  |
| H  | -3.402411 | 4.665466  | -1.220752 | C               | -2.368582 | -0.123828 | 1.651263  |
| C  | -1.649236 | 3.675104  | -2.015147 | C               | -2.036030 | -0.747464 | 2.862255  |
| H  | -1.140417 | 4.602581  | -2.289632 | H               | -1.114105 | -0.521524 | 3.402383  |
| C  | -1.035351 | 2.452031  | -2.267210 | C               | -2.910241 | -1.683227 | 3.401773  |
| H  | -0.056771 | 2.413269  | -2.752232 | C               | -4.103461 | -2.037320 | 2.783522  |
| C  | -1.656657 | 1.239295  | -1.920275 | H               | -4.775673 | -2.775168 | 3.220623  |
| C  | -0.894336 | -0.017294 | -2.109585 | C               | -4.406236 | -1.399102 | 1.585952  |
| O  | 0.323832  | 0.005003  | -2.522098 | C               | -3.570086 | -0.454050 | 1.007773  |
| F  | 5.567621  | -4.458365 | 0.450441  | H               | -3.859347 | -0.000723 | 0.055946  |
| F  | 6.640422  | -1.129593 | -2.663653 | C               | -2.243124 | 2.342555  | 0.247193  |
| F  | 5.605938  | 3.541284  | 1.513903  | C               | -2.198638 | 2.733048  | -1.094661 |
| F  | 1.791333  | 4.547583  | -1.017785 | H               | -1.577250 | 2.201375  | -1.822185 |
| F  | -4.922409 | 1.771472  | 2.885638  | C               | -2.988771 | 3.804976  | -1.500000 |

|              |           |           |           |    |           |           |           |
|--------------|-----------|-----------|-----------|----|-----------|-----------|-----------|
| C            | -3.807808 | 4.501418  | -0.621590 | C  | -0.424329 | 1.447008  | -2.436411 |
| H            | -4.419749 | 5.338151  | -0.958275 | H  | -0.345518 | 0.548867  | -3.069139 |
| C            | -3.825265 | 4.085059  | 0.705504  | H  | -1.000566 | 2.182734  | -3.016910 |
| C            | -3.063268 | 3.017925  | 1.160613  | C  | 0.955205  | 1.979845  | -2.075357 |
| H            | -3.127108 | 2.725031  | 2.211315  | H  | 0.882735  | 2.984696  | -1.628556 |
| Ni           | 0.184236  | 0.123891  | -0.653177 | H  | 1.610324  | 2.086962  | -2.954186 |
| O            | 0.591700  | -1.346095 | -1.983488 | C  | -2.238061 | -0.554536 | -1.330330 |
| C            | 0.866019  | -2.647634 | -1.675456 | C  | -3.579934 | -0.736472 | -0.983932 |
| C            | 2.021660  | -3.187831 | -2.249557 | H  | -4.176513 | 0.056433  | -0.528225 |
| H            | 2.608039  | -2.560583 | -2.924447 | C  | -4.159525 | -1.982250 | -1.197462 |
| C            | 2.410087  | -4.487898 | -1.942496 | C  | -3.460056 | -3.052857 | -1.740781 |
| H            | 3.317254  | -4.900816 | -2.391361 | H  | -3.933125 | -4.023496 | -1.886944 |
| C            | 1.644790  | -5.257884 | -1.065590 | C  | -2.125412 | -2.839903 | -2.062924 |
| H            | 1.947918  | -6.276952 | -0.815144 | C  | -1.500645 | -1.615727 | -1.876263 |
| C            | 0.492688  | -4.714842 | -0.501179 | H  | -0.439140 | -1.520073 | -2.121698 |
| H            | -0.107598 | -5.308771 | 0.194712  | C  | -2.624369 | 2.212089  | -0.613844 |
| C            | 0.085568  | -3.408853 | -0.789509 | C  | -2.855059 | 2.593883  | 0.712077  |
| C            | -1.122060 | -2.782114 | -0.166756 | H  | -2.251968 | 2.180178  | 1.526917  |
| H            | -0.799831 | -1.829466 | 0.308144  | C  | -3.887028 | 3.488363  | 0.974123  |
| H            | -1.524705 | -3.428413 | 0.625888  | C  | -4.677079 | 4.030027  | -0.031096 |
| C            | -2.189963 | -2.461287 | -1.170944 | H  | -5.479397 | 4.732755  | 0.193465  |
| C            | -3.402667 | -3.154804 | -1.174784 | C  | -4.409159 | 3.638028  | -1.338475 |
| H            | -3.562921 | -3.939932 | -0.429569 | C  | -3.403467 | 2.734349  | -1.654690 |
| C            | -4.412728 | -2.842147 | -2.081474 | H  | -3.261386 | 2.443215  | -2.697707 |
| H            | -5.358694 | -3.388138 | -2.050647 | C  | 2.154620  | -0.630922 | -1.649642 |
| C            | -4.219733 | -1.820619 | -3.012480 | C  | 2.119895  | -0.749040 | -3.044860 |
| H            | -5.007600 | -1.569536 | -3.726527 | H  | 1.929566  | 0.098479  | -3.705326 |
| C            | -3.018454 | -1.120791 | -3.028054 | C  | 2.325352  | -2.001016 | -3.617068 |
| H            | -2.845634 | -0.314302 | -3.744513 | C  | 2.560743  | -3.140879 | -2.859747 |
| C            | -1.993305 | -1.438072 | -2.123228 | H  | 2.698150  | -4.114349 | -3.329682 |
| C            | -0.794439 | -0.583021 | -2.142172 | C  | 2.609738  | -2.987546 | -1.478861 |
| O            | -0.603112 | 0.415200  | -2.847453 | C  | 2.417497  | -1.759117 | -0.861762 |
| F            | -2.594074 | -2.264526 | 4.564379  | H  | 2.452730  | -1.701610 | 0.228781  |
| F            | -5.545750 | -1.722598 | 0.968543  | C  | 3.303171  | 1.733565  | -0.404424 |
| F            | -4.609763 | 4.739752  | 1.567258  | C  | 3.248193  | 2.945100  | 0.296888  |
| F            | -2.964555 | 4.180915  | -2.780627 | H  | 2.303808  | 3.369684  | 0.641971  |
| F            | 3.119433  | -4.100220 | 1.820636  | C  | 4.436384  | 3.601728  | 0.585867  |
| F            | 6.416756  | -1.633557 | -0.408918 | C  | 5.677871  | 3.091245  | 0.224155  |
| F            | 5.572800  | 4.216028  | 1.594889  | H  | 6.599403  | 3.620303  | 0.466651  |
| F            | 2.806173  | 4.957960  | -2.108637 | C  | 5.696271  | 1.877425  | -0.449258 |
|              |           |           |           | C  | 4.535377  | 1.185194  | -0.774970 |
| <b>4(L4)</b> |           |           |           | H  | 4.615833  | 0.238534  | -1.312114 |
| P            | -1.326780 | 0.963888  | -0.892154 | Ni | 0.220467  | 0.598399  | 0.733655  |
| P            | 1.717312  | 0.915531  | -0.770882 | O  | -1.061791 | 0.426596  | 2.174181  |

|                 |           |           |           |    |           |           |           |
|-----------------|-----------|-----------|-----------|----|-----------|-----------|-----------|
| C               | -1.942035 | -0.548455 | 2.163633  | C  | -4.144801 | 0.289158  | 0.089552  |
| C               | -3.264661 | -0.317790 | 2.613824  | H  | -3.899453 | 1.013814  | 0.869244  |
| H               | -3.516402 | 0.681591  | 2.981066  | C  | -5.388252 | -0.327416 | 0.104221  |
| C               | -4.219367 | -1.328850 | 2.599987  | C  | -5.760072 | -1.278668 | -0.839248 |
| H               | -5.233112 | -1.114738 | 2.951676  | H  | -6.740971 | -1.752124 | -0.809399 |
| C               | -3.896425 | -2.606651 | 2.138683  | C  | -4.830408 | -1.602868 | -1.818293 |
| H               | -4.649437 | -3.397847 | 2.112619  | C  | -3.571895 | -1.014977 | -1.878927 |
| C               | -2.594088 | -2.855122 | 1.705057  | H  | -2.882821 | -1.331915 | -2.662237 |
| H               | -2.324453 | -3.855192 | 1.345921  | C  | -1.844803 | 2.462976  | -0.692839 |
| C               | -1.614657 | -1.860013 | 1.707527  | C  | -0.952412 | 3.191926  | 0.098798  |
| C               | -0.217604 | -2.148915 | 1.234602  | H  | -0.155547 | 2.682766  | 0.649076  |
| H               | 0.088095  | -1.400928 | 0.471282  | C  | -1.099965 | 4.571890  | 0.184367  |
| H               | -0.209333 | -3.116119 | 0.705435  | C  | -2.111197 | 5.249847  | -0.483167 |
| C               | 0.821952  | -2.195208 | 2.328636  | H  | -2.221297 | 6.330830  | -0.398341 |
| C               | 1.035803  | -3.418681 | 2.977863  | C  | -2.985297 | 4.494781  | -1.258839 |
| H               | 0.444937  | -4.286094 | 2.668285  | C  | -2.873466 | 3.115199  | -1.383539 |
| C               | 1.974537  | -3.554056 | 3.995214  | H  | -3.590650 | 2.574730  | -2.005433 |
| H               | 2.119493  | -4.525148 | 4.475185  | C  | 2.125225  | -1.430149 | -1.880464 |
| C               | 2.731881  | -2.451368 | 4.394839  | C  | 3.229714  | -1.317154 | -2.737717 |
| H               | 3.473066  | -2.548033 | 5.191805  | H  | 3.755628  | -0.371875 | -2.889803 |
| C               | 2.531162  | -1.229042 | 3.770446  | C  | 3.663952  | -2.448768 | -3.413076 |
| H               | 3.103190  | -0.345900 | 4.064919  | C  | 3.044151  | -3.685525 | -3.269178 |
| C               | 1.583763  | -1.079845 | 2.742189  | H  | 3.400638  | -4.562500 | -3.809878 |
| C               | 1.468454  | 0.286649  | 2.138731  | C  | 1.954231  | -3.757639 | -2.412234 |
| O               | 2.037390  | 1.242067  | 2.621053  | C  | 1.476079  | -2.657318 | -1.705813 |
| F               | -1.411420 | -3.856384 | -2.559282 | H  | 0.611929  | -2.751984 | -1.033338 |
| F               | -5.439441 | -2.162535 | -0.866115 | C  | 2.940724  | 0.988309  | -0.563782 |
| F               | 2.821132  | -4.062834 | -0.720245 | C  | 3.019620  | 2.380098  | -0.694632 |
| F               | 2.280845  | -2.114471 | -4.945913 | H  | 2.253833  | 2.971619  | -1.198959 |
| F               | 6.875339  | 1.359228  | -0.802946 | C  | 4.117088  | 3.042678  | -0.154619 |
| F               | 4.392681  | 4.764671  | 1.238230  | C  | 5.131575  | 2.381392  | 0.524823  |
| F               | -5.155507 | 4.147012  | -2.322367 | H  | 5.976769  | 2.921328  | 0.951104  |
| F               | -4.130996 | 3.839526  | 2.237830  | C  | 5.016258  | 1.001231  | 0.647023  |
|                 |           |           |           | C  | 3.951716  | 0.291042  | 0.111874  |
|                 |           |           |           | H  | 3.913182  | -0.791764 | 0.253331  |
| <b>5-ts(L4)</b> |           |           |           | Ni | -0.109290 | -0.179588 | 0.586394  |
| P               | -1.569626 | 0.657296  | -0.833242 | O  | -0.837411 | -2.114725 | 0.186234  |
| P               | 1.453543  | 0.049235  | -1.030874 | C  | -1.374388 | -2.544128 | 1.302773  |
| C               | -0.809812 | 0.479906  | -2.504744 | C  | -2.771245 | -2.740212 | 1.434906  |
| H               | -0.842505 | -0.591692 | -2.762896 | H  | -3.395618 | -2.572370 | 0.552774  |
| H               | -1.386320 | 1.021777  | -3.270989 | C  | -3.343683 | -3.099805 | 2.650299  |
| C               | 0.631991  | 0.960360  | -2.420122 | H  | -4.430709 | -3.213701 | 2.718098  |
| H               | 0.661518  | 2.040584  | -2.203630 | C  | -2.548711 | -3.310781 | 3.779476  |
| H               | 1.171620  | 0.809838  | -3.367793 | H  | -2.997767 | -3.590516 | 4.735322  |
| C               | -3.234065 | -0.057308 | -0.917608 |    |           |           |           |

|              |           |           |           |    |           |           |           |
|--------------|-----------|-----------|-----------|----|-----------|-----------|-----------|
| C            | -1.164511 | -3.169991 | 3.659999  | H  | 1.766277  | 3.333684  | -0.600195 |
| H            | -0.524495 | -3.352545 | 4.531138  | C  | 2.113843  | -0.997582 | -1.876528 |
| C            | -0.566869 | -2.804363 | 2.453640  | C  | 1.451225  | -2.228401 | -1.823213 |
| C            | 0.926750  | -2.686602 | 2.319051  | H  | 0.594605  | -2.384939 | -1.153747 |
| H            | 1.181847  | -2.874237 | 1.260120  | C  | 1.915077  | -3.263212 | -2.629698 |
| H            | 1.419954  | -3.478379 | 2.902886  | C  | 3.002141  | -3.122114 | -3.480873 |
| C            | 1.548454  | -1.368725 | 2.703110  | H  | 3.352088  | -3.948572 | -4.099555 |
| C            | 2.697510  | -1.354055 | 3.507974  | C  | 3.629237  | -1.881408 | -3.513110 |
| H            | 3.085295  | -2.307699 | 3.879879  | C  | 3.209081  | -0.812527 | -2.733283 |
| C            | 3.355646  | -0.169862 | 3.833748  | H  | 3.742348  | 0.137629  | -2.807208 |
| H            | 4.246751  | -0.199614 | 4.465840  | C  | -2.200590 | 2.377003  | -0.418723 |
| C            | 2.870820  | 1.048974  | 3.360982  | C  | -2.096638 | 3.370632  | -1.399708 |
| H            | 3.368760  | 1.986635  | 3.620513  | H  | -1.718446 | 3.176059  | -2.404152 |
| C            | 1.734938  | 1.060410  | 2.557279  | C  | -2.502539 | 4.665696  | -1.093522 |
| H            | 1.338718  | 2.017737  | 2.201511  | C  | -3.014779 | 5.015537  | 0.147338  |
| C            | 1.081443  | -0.131532 | 2.209244  | H  | -3.327964 | 6.036152  | 0.365936  |
| C            | -0.771431 | 0.286287  | 2.118860  | C  | -3.116601 | 4.006465  | 1.098020  |
| O            | -1.408237 | 0.620714  | 3.035094  | C  | -2.710899 | 2.702465  | 0.845406  |
| F            | -5.160661 | -2.511342 | -2.738662 | H  | -2.818685 | 1.957721  | 1.635873  |
| F            | -6.263700 | 0.000374  | 1.055344  | C  | -3.200859 | -0.284530 | -0.984409 |
| F            | -3.965578 | 5.125560  | -1.906959 | C  | -3.106864 | -1.560203 | -1.558498 |
| F            | -0.245468 | 5.266907  | 0.936663  | H  | -2.151222 | -2.006962 | -1.829926 |
| F            | 1.344387  | -4.935386 | -2.262922 | C  | -4.270711 | -2.293347 | -1.745641 |
| F            | 4.712679  | -2.351334 | -4.235752 | C  | -5.522788 | -1.823338 | -1.366600 |
| F            | 5.959801  | 0.339380  | 1.318865  | H  | -6.422597 | -2.419308 | -1.518514 |
| F            | 4.199057  | 4.368301  | -0.293800 | C  | -5.578375 | -0.560424 | -0.793890 |
|              |           |           |           | C  | -4.446707 | 0.221386  | -0.596060 |
|              |           |           |           | H  | -4.568036 | 1.212318  | -0.156833 |
| <b>6(L4)</b> |           |           |           | Ni | -0.062023 | -0.111086 | 0.719770  |
| P            | 1.418794  | 0.394337  | -0.908398 | O  | -0.757798 | -1.999505 | 0.265083  |
| P            | -1.660581 | 0.652943  | -0.718851 | C  | -1.074116 | -2.668349 | 1.352523  |
| C            | 0.521514  | 1.315875  | -2.243194 | C  | -2.415794 | -2.833302 | 1.771573  |
| H            | 0.457205  | 2.377245  | -1.957644 | H  | -3.206959 | -2.376303 | 1.169173  |
| H            | 1.083731  | 1.270834  | -3.188321 | C  | -2.728436 | -3.552705 | 2.921962  |
| C            | -0.860458 | 0.703391  | -2.374999 | H  | -3.775995 | -3.664847 | 3.218257  |
| H            | -0.787801 | -0.343866 | -2.712345 | C  | -1.719878 | -4.125918 | 3.698161  |
| H            | -1.492842 | 1.217282  | -3.115369 | H  | -1.964353 | -4.691587 | 4.600424  |
| C            | 2.851161  | 1.431089  | -0.477908 | C  | -0.389544 | -3.963774 | 3.304100  |
| C            | 4.053990  | 0.825250  | -0.094558 | H  | 0.412893  | -4.403381 | 3.907575  |
| H            | 4.197414  | -0.256608 | -0.132618 | C  | -0.052276 | -3.254755 | 2.151774  |
| C            | 5.081912  | 1.621087  | 0.392360  | C  | 1.373537  | -3.047072 | 1.731027  |
| C            | 4.967192  | 3.000889  | 0.511624  | H  | 1.426610  | -3.069518 | 0.631469  |
| H            | 5.785611  | 3.609148  | 0.895934  | H  | 1.994353  | -3.880042 | 2.092177  |
| C            | 3.759103  | 3.570832  | 0.131498  | C  | 1.979918  | -1.755575 | 2.231419  |
| C            | 2.697364  | 2.818365  | -0.354901 |    |           |           |           |

|               |           |           |           |    |           |           |           |
|---------------|-----------|-----------|-----------|----|-----------|-----------|-----------|
| C             | 3.100163  | -1.836966 | 3.077722  | C  | 2.202839  | -2.703516 | -3.314774 |
| H             | 3.497788  | -2.830098 | 3.312409  | C  | 1.959995  | -1.393936 | -2.914831 |
| C             | 3.704855  | -0.709359 | 3.626356  | H  | 1.628816  | -0.679668 | -3.669541 |
| H             | 4.570226  | -0.818445 | 4.284891  | C  | -2.741751 | 2.020550  | -0.915905 |
| C             | 3.184984  | 0.549600  | 3.340970  | C  | -3.454418 | 2.417424  | -2.054202 |
| H             | 3.628156  | 1.451181  | 3.773553  | H  | -3.234430 | 2.028949  | -3.050727 |
| C             | 2.083729  | 0.653763  | 2.492048  | C  | -4.490115 | 3.332067  | -1.903122 |
| H             | 1.685807  | 1.650043  | 2.270103  | C  | -4.847664 | 3.854795  | -0.666512 |
| C             | 1.485137  | -0.475196 | 1.917820  | H  | -5.660664 | 4.574333  | -0.570020 |
| C             | -0.809841 | 0.399398  | 2.255405  | C  | -4.127717 | 3.427116  | 0.442626  |
| O             | -1.258851 | 0.600933  | 3.295764  | C  | -3.078817 | 2.520003  | 0.347468  |
| F             | 1.296350  | -4.444913 | -2.580711 | H  | -2.556785 | 2.179277  | 1.246459  |
| F             | 4.675648  | -1.715951 | -4.327154 | C  | -2.206308 | -0.807372 | -1.098004 |
| F             | 6.220784  | 1.041255  | 0.773272  | C  | -1.471905 | -1.909737 | -1.556155 |
| F             | 3.612877  | 4.893544  | 0.243759  | H  | -0.468017 | -1.809666 | -1.974790 |
| F             | -2.402101 | 5.607365  | -2.033471 | C  | -2.017824 | -3.178612 | -1.433615 |
| F             | -3.618608 | 4.306228  | 2.294705  | C  | -3.269543 | -3.400093 | -0.871336 |
| F             | -4.189175 | -3.500289 | -2.307988 | H  | -3.678510 | -4.404839 | -0.768357 |
| F             | -6.767150 | -0.069134 | -0.434821 | C  | -3.972706 | -2.286395 | -0.429944 |
|               |           |           |           | C  | -3.469316 | -0.993897 | -0.530138 |
|               |           |           |           | H  | -4.053960 | -0.163451 | -0.130907 |
| <b>10(L4)</b> |           |           |           | Ni | 0.123678  | 0.780724  | 0.664319  |
| P             | 1.637868  | 0.579679  | -0.912885 | O  | -1.467273 | 0.176277  | 1.744125  |
| P             | -1.378718 | 0.811278  | -1.009815 | C  | -1.911594 | -0.969767 | 2.191558  |
| C             | 0.928082  | 1.483444  | -2.360472 | C  | -3.206279 | -1.029109 | 2.767655  |
| H             | 0.949000  | 2.545454  | -2.069242 | H  | -3.777993 | -0.097772 | 2.828499  |
| H             | 1.572726  | 1.406500  | -3.249734 | C  | -3.743073 | -2.223236 | 3.234836  |
| C             | -0.506173 | 1.048014  | -2.628609 | H  | -4.748261 | -2.225518 | 3.667581  |
| H             | -0.546594 | 0.096537  | -3.181390 | C  | -3.016438 | -3.412244 | 3.145603  |
| H             | -1.029791 | 1.785713  | -3.254327 | H  | -3.434824 | -4.354142 | 3.507608  |
| C             | 3.196357  | 1.467083  | -0.564772 | C  | -1.735287 | -3.369592 | 2.592148  |
| C             | 4.415705  | 0.802012  | -0.407991 | H  | -1.146822 | -4.291465 | 2.517241  |
| H             | 4.518969  | -0.273874 | -0.556494 | C  | -1.169328 | -2.183917 | 2.121382  |
| C             | 5.538419  | 1.537747  | -0.042762 | C  | 0.208628  | -2.163044 | 1.526910  |
| C             | 5.500055  | 2.909217  | 0.170014  | H  | 0.146397  | -1.772810 | 0.495173  |
| H             | 6.392229  | 3.466909  | 0.453577  | H  | 0.586524  | -3.195595 | 1.448987  |
| C             | 4.274842  | 3.541955  | -0.002295 | C  | 1.205732  | -1.314541 | 2.274998  |
| C             | 3.123781  | 2.851947  | -0.358199 | C  | 1.977370  | -1.879058 | 3.300377  |
| H             | 2.192129  | 3.413373  | -0.456490 | H  | 1.813855  | -2.929817 | 3.563776  |
| C             | 2.138408  | -1.051072 | -1.566379 | C  | 2.945417  | -1.135378 | 3.972111  |
| C             | 2.580808  | -2.023283 | -0.658943 | H  | 3.540270  | -1.598848 | 4.763213  |
| H             | 2.728250  | -1.797745 | 0.398844  | C  | 3.154851  | 0.197186  | 3.622492  |
| C             | 2.800160  | -3.318227 | -1.106777 | H  | 3.915573  | 0.791612  | 4.136250  |
| C             | 2.613795  | -3.693331 | -2.432087 | C  | 2.382575  | 0.778745  | 2.613824  |
| H             | 2.777885  | -4.718610 | -2.762821 |    |           |           |           |

|                  |           |           |           |    |           |           |           |
|------------------|-----------|-----------|-----------|----|-----------|-----------|-----------|
| H                | 2.562682  | 1.827606  | 2.350457  | C  | 3.552001  | -3.401598 | -2.852389 |
| C                | 1.405561  | 0.038535  | 1.942836  | H  | 3.989047  | -4.270155 | -3.344934 |
| C                | 0.165475  | 2.554599  | 1.237114  | C  | 2.366103  | -3.491469 | -2.138593 |
| O                | 0.210649  | 3.626933  | 1.644779  | C  | 1.798624  | -2.397850 | -1.491464 |
| F                | -5.166712 | 3.727097  | -2.983937 | H  | 0.878474  | -2.541629 | -0.923877 |
| F                | -4.457145 | 3.912969  | 1.639240  | C  | 3.174874  | 1.270467  | -0.324604 |
| F                | -1.307334 | -4.226310 | -1.864489 | C  | 3.451216  | 2.558282  | -0.796460 |
| F                | -5.175745 | -2.465609 | 0.114669  | H  | 2.836509  | 3.055740  | -1.548070 |
| F                | 3.181169  | -4.243635 | -0.225621 | C  | 4.551504  | 3.236386  | -0.283078 |
| F                | 2.024379  | -3.022979 | -4.598638 | C  | 5.383359  | 2.691183  | 0.686067  |
| F                | 6.700894  | 0.901023  | 0.104999  | H  | 6.235063  | 3.244466  | 1.080648  |
| F                | 4.202548  | 4.860640  | 0.183636  | C  | 5.078463  | 1.410935  | 1.135418  |
|                  |           |           |           | C  | 3.998837  | 0.688309  | 0.649709  |
|                  |           |           |           | H  | 3.805634  | -0.312187 | 1.044576  |
| <b>11-ts(L4)</b> |           |           |           | Ni | 0.118167  | 0.736676  | 0.784272  |
| P                | -1.426055 | 0.613955  | -0.902657 | O  | -0.842283 | 0.272982  | 2.488873  |
| P                | 1.676614  | 0.336186  | -0.773510 | C  | -1.747379 | -0.711306 | 2.581677  |
| C                | -0.454852 | 0.616358  | -2.486492 | C  | -2.991414 | -0.387768 | 3.154014  |
| H                | -0.384302 | -0.418953 | -2.856018 | H  | -3.153496 | 0.638299  | 3.493227  |
| H                | -0.984575 | 1.180953  | -3.268266 | C  | -3.984880 | -1.353932 | 3.271433  |
| C                | 0.934088  | 1.191221  | -2.236754 | H  | -4.951341 | -1.081218 | 3.704128  |
| H                | 0.856028  | 2.261435  | -1.984001 | C  | -3.751915 | -2.661514 | 2.840692  |
| H                | 1.576376  | 1.111870  | -3.127989 | H  | -4.532932 | -3.420797 | 2.926241  |
| C                | -2.508683 | -0.856189 | -0.995524 | C  | -2.512937 | -2.986464 | 2.291894  |
| C                | -3.779595 | -0.808796 | -0.403627 | H  | -2.317444 | -4.009841 | 1.954513  |
| H                | -4.185603 | 0.110962  | 0.022756  | C  | -1.501361 | -2.033331 | 2.149180  |
| C                | -4.535395 | -1.970969 | -0.335114 | C  | -0.171646 | -2.355477 | 1.535498  |
| C                | -4.091245 | -3.186639 | -0.843113 | H  | -0.182988 | -1.986097 | 0.489508  |
| H                | -4.701995 | -4.086896 | -0.781548 | H  | -0.015827 | -3.443250 | 1.489938  |
| C                | -2.828641 | -3.204208 | -1.417961 | C  | 0.943667  | -1.674898 | 2.270472  |
| C                | -2.026578 | -2.072023 | -1.501846 | C  | 1.979363  | -2.354842 | 2.912552  |
| H                | -1.043277 | -2.168899 | -1.966284 | H  | 2.023560  | -3.445250 | 2.824438  |
| C                | -2.635585 | 1.983746  | -1.088430 | C  | 2.930240  | -1.672392 | 3.677834  |
| C                | -2.823197 | 2.847094  | -0.004627 | H  | 3.730919  | -2.222437 | 4.176578  |
| H                | -2.261252 | 2.728009  | 0.925774  | C  | 2.821131  | -0.288413 | 3.833337  |
| C                | -3.754625 | 3.875022  | -0.118196 | H  | 3.546126  | 0.256308  | 4.444969  |
| C                | -4.494937 | 4.082405  | -1.273766 | C  | 1.798218  | 0.419078  | 3.203230  |
| H                | -5.216117 | 4.896291  | -1.346944 | H  | 1.709522  | 1.500878  | 3.332686  |
| C                | -4.287434 | 3.203867  | -2.331940 | C  | 0.924698  | -0.270375 | 2.352826  |
| C                | -3.377520 | 2.157744  | -2.263864 | C  | 0.495826  | 2.494436  | 1.054774  |
| H                | -3.277300 | 1.487217  | -3.120108 | O  | 0.807627  | 3.605405  | 1.101330  |
| C                | 2.434288  | -1.155338 | -1.565508 | F  | 4.823100  | 4.461177  | -0.743269 |
| C                | 3.632968  | -1.033151 | -2.283296 | F  | 5.849828  | 0.863057  | 2.078088  |
| H                | 4.166189  | -0.083185 | -2.364237 | F  | -3.941884 | 4.694881  | 0.917252  |
| C                | 4.164547  | -2.154230 | -2.905980 |    |           |           |           |



|               |           |           |           |              |           |           |           |
|---------------|-----------|-----------|-----------|--------------|-----------|-----------|-----------|
| F             | -4.997385 | 3.375690  | -3.450008 | H            | 2.101949  | 2.574326  | -1.182126 |
| F             | -5.740465 | -1.925615 | 0.237683  | C            | 4.160357  | 2.914136  | -0.728527 |
| F             | -2.365237 | -4.356490 | -1.913735 | C            | 5.353277  | 2.464609  | -0.178182 |
| F             | 1.748049  | -4.672872 | -2.067678 | H            | 6.251720  | 3.080699  | -0.184195 |
| F             | 5.306217  | -2.034044 | -3.587702 | C            | 5.346797  | 1.194767  | 0.386854  |
|               |           |           |           | C            | 4.216180  | 0.388669  | 0.406326  |
|               |           |           |           | H            | 4.276336  | -0.597591 | 0.872059  |
| <b>12(L4)</b> |           |           |           | Ni           | -0.015195 | -0.119738 | 1.547043  |
| P             | -1.557269 | -0.068534 | 0.005179  | C            | 0.093707  | -0.261140 | 3.282417  |
| P             | 1.491900  | -0.112917 | -0.021540 | O            | 0.190836  | -0.369968 | 4.435888  |
| C             | -0.735798 | -0.471587 | -1.614882 | F            | -0.817607 | 4.818125  | 1.313536  |
| H             | -0.625540 | -1.568461 | -1.663753 | F            | -3.676903 | 4.071427  | -2.318712 |
| H             | -1.356485 | -0.170559 | -2.474281 | F            | -6.335676 | -0.738270 | 1.690088  |
| C             | 0.627067  | 0.198906  | -1.647091 | F            | -5.104432 | -3.234312 | -2.075512 |
| H             | 0.504389  | 1.288503  | -1.760151 | F            | 4.131403  | 4.130142  | -1.281830 |
| H             | 1.235536  | -0.142675 | -2.499506 | F            | 6.477614  | 0.735776  | 0.929655  |
| C             | -3.215517 | -0.825573 | -0.144822 | F            | 4.122170  | -3.938906 | -2.356322 |
| C             | -4.169704 | -0.482312 | 0.824069  | F            | 1.261667  | -5.077534 | 1.172642  |
| H             | -3.945348 | 0.232469  | 1.619516  |              |           |           |           |
| C             | -5.423388 | -1.073241 | 0.774476  |              |           |           |           |
| C             | -5.770357 | -2.010874 | -0.193256 | <b>2(L5)</b> |           |           |           |
| H             | -6.758575 | -2.469381 | -0.211199 | P            | 2.331261  | -0.775064 | 0.316003  |
| C             | -4.802115 | -2.337925 | -1.131371 | P            | -0.565876 | -0.409125 | 1.186390  |
| C             | -3.534190 | -1.764997 | -1.133061 | C            | 1.939468  | -1.236090 | 2.065293  |
| H             | -2.829159 | -2.068410 | -1.907940 | H            | 1.712971  | -2.314628 | 2.052743  |
| C             | -1.904951 | 1.723414  | -0.216084 | H            | 2.797707  | -1.108201 | 2.743225  |
| C             | -1.250599 | 2.603717  | 0.653968  | C            | 0.725408  | -0.451007 | 2.531963  |
| H             | -0.610097 | 2.222256  | 1.459180  | H            | 0.998576  | 0.596479  | 2.739602  |
| C             | -1.437340 | 3.971806  | 0.488836  | H            | 0.319749  | -0.851182 | 3.473531  |
| C             | -2.251766 | 4.492147  | -0.508942 | C            | 3.868031  | -1.706307 | -0.040397 |
| H             | -2.389511 | 5.567343  | -0.622791 | C            | 4.830286  | -1.169754 | -0.904396 |
| C             | -2.889649 | 3.589841  | -1.353082 | H            | 4.708725  | -0.166121 | -1.319094 |
| C             | -2.733933 | 2.214211  | -1.230752 | C            | 5.970035  | -1.909137 | -1.253599 |
| H             | -3.263258 | 1.551301  | -1.919344 | C            | 6.161806  | -3.200792 | -0.746507 |
| C             | 2.044289  | -1.848558 | -0.261682 | H            | 7.049369  | -3.774454 | -1.013555 |
| C             | 2.943401  | -2.224981 | -1.266554 | C            | 5.196008  | -3.742373 | 0.109685  |
| H             | 3.409418  | -1.495170 | -1.932840 | C            | 4.055671  | -3.000899 | 0.456574  |
| C             | 3.256537  | -3.570909 | -1.407992 | H            | 3.322980  | -3.458558 | 1.124083  |
| C             | 2.701282  | -4.556586 | -0.598696 | C            | 2.907698  | 0.968260  | 0.429744  |
| H             | 2.959974  | -5.607403 | -0.728957 | C            | 2.582885  | 1.808620  | -0.643283 |
| C             | 1.809424  | -4.149787 | 0.384956  | H            | 2.071254  | 1.395519  | -1.520018 |
| C             | 1.473160  | -2.813886 | 0.574699  | C            | 2.886774  | 3.178705  | -0.592930 |
| H             | 0.775772  | -2.519426 | 1.366945  | C            | 3.490446  | 3.725035  | 0.547910  |
| C             | 3.028677  | 0.865310  | -0.168274 | H            | 3.693546  | 4.794939  | 0.604669  |
| C             | 3.001494  | 2.147214  | -0.735253 | C            | 3.821254  | 2.882955  | 1.616770  |

|    |           |           |           |                 |           |           |           |
|----|-----------|-----------|-----------|-----------------|-----------|-----------|-----------|
| C  | 3.544311  | 1.504743  | 1.550667  | C               | -1.382417 | 1.270717  | -2.154290 |
| H  | 3.823406  | 0.871796  | 2.396765  | C               | -0.781775 | -0.083075 | -2.224329 |
| C  | -1.791285 | -1.693111 | 1.651156  | O               | 0.451578  | -0.236205 | -2.552777 |
| C  | -2.250434 | -1.904823 | 2.953631  | C               | -3.752901 | -4.264334 | -0.219079 |
| H  | -1.888984 | -1.293185 | 3.784528  | N               | -4.170059 | -4.885326 | -1.111212 |
| C  | -3.202620 | -2.905519 | 3.212271  | C               | -3.662564 | -3.115637 | 4.548778  |
| C  | -3.704196 | -3.692765 | 2.167112  | N               | -4.028482 | -3.278149 | 5.642132  |
| H  | -4.449725 | -4.462412 | 2.369361  | C               | -4.612391 | 2.815476  | 2.486735  |
| C  | -3.241142 | -3.482129 | 0.862322  | N               | -5.722616 | 2.930100  | 2.819486  |
| C  | -2.274530 | -2.495077 | 0.612051  | C               | -0.361669 | 4.719000  | 0.909438  |
| H  | -1.905526 | -2.337858 | -0.407164 | N               | 0.352474  | 5.580795  | 0.586313  |
| C  | -1.398551 | 1.192487  | 1.519469  | C               | 5.369007  | -5.056571 | 0.643804  |
| C  | -0.648332 | 2.321734  | 1.170997  | N               | 5.499607  | -6.125253 | 1.087343  |
| H  | 0.364799  | 2.197742  | 0.776237  | C               | 6.945091  | -1.337841 | -2.128729 |
| C  | -1.178282 | 3.610774  | 1.291935  | N               | 7.738410  | -0.867491 | -2.839355 |
| C  | -2.493843 | 3.787518  | 1.739753  | C               | 4.439984  | 3.420900  | 2.787233  |
| H  | -2.923289 | 4.786596  | 1.818152  | N               | 4.944479  | 3.839674  | 3.749553  |
| C  | -3.255566 | 2.659328  | 2.066644  | C               | 2.545252  | 4.017399  | -1.698115 |
| C  | -2.710367 | 1.365905  | 1.958371  | N               | 2.257309  | 4.681411  | -2.610160 |
| H  | -3.337369 | 0.506500  | 2.209610  |                 |           |           |           |
| Ni | 0.399284  | -0.532594 | -0.687631 | <b>3-ts(L5)</b> |           |           |           |
| O  | -1.558537 | -1.211514 | -2.539046 | P               | 1.888305  | 0.896812  | 0.718893  |
| C  | -2.876201 | -1.262956 | -2.919799 | P               | -1.189726 | 1.054956  | 0.880586  |
| C  | -3.183060 | -2.168073 | -3.937725 | C               | 1.176160  | 1.234850  | 2.404871  |
| H  | -2.367101 | -2.713248 | -4.415246 | H               | 1.187580  | 0.284824  | 2.961689  |
| C  | -4.508425 | -2.365322 | -4.313451 | H               | 1.822394  | 1.920198  | 2.973976  |
| H  | -4.743458 | -3.076886 | -5.107935 | C               | -0.237017 | 1.797366  | 2.292243  |
| C  | -5.527433 | -1.658232 | -3.676824 | H               | -0.194391 | 2.872843  | 2.055432  |
| H  | -6.568983 | -1.808629 | -3.967850 | H               | -0.780921 | 1.715078  | 3.246781  |
| C  | -5.210948 | -0.759637 | -2.659762 | C               | 2.584124  | -0.787831 | 0.863357  |
| H  | -6.005987 | -0.207212 | -2.150837 | C               | 3.858287  | -1.158415 | 0.432363  |
| C  | -3.888377 | -0.555003 | -2.256184 | H               | 4.585493  | -0.406177 | 0.117328  |
| C  | -3.522231 | 0.386106  | -1.147994 | C               | 4.217438  | -2.516977 | 0.377054  |
| H  | -2.965919 | -0.180867 | -0.377174 | C               | 3.306225  | -3.514706 | 0.745448  |
| H  | -4.430003 | 0.766988  | -0.658775 | H               | 3.582320  | -4.567517 | 0.682804  |
| C  | -2.663654 | 1.523189  | -1.614537 | C               | 2.030207  | -3.139508 | 1.182373  |
| C  | -3.116956 | 2.841256  | -1.521535 | C               | 1.674782  | -1.786041 | 1.231941  |
| H  | -4.115596 | 3.025552  | -1.113515 | H               | 0.658851  | -1.518224 | 1.539188  |
| C  | -2.324424 | 3.912246  | -1.930957 | C               | 3.360352  | 1.968538  | 0.520230  |
| H  | -2.696621 | 4.936147  | -1.843956 | C               | 3.544173  | 2.561024  | -0.731779 |
| C  | -1.053372 | 3.668120  | -2.450980 | H               | 2.812493  | 2.393131  | -1.527439 |
| H  | -0.419014 | 4.495898  | -2.776632 | C               | 4.668253  | 3.366235  | -0.978727 |
| C  | -0.591502 | 2.360352  | -2.561936 | C               | 5.611166  | 3.583908  | 0.032714  |
| H  | 0.391801  | 2.159975  | -2.994908 | H               | 6.484814  | 4.209055  | -0.155167 |

|    |           |           |           |              |           |           |           |
|----|-----------|-----------|-----------|--------------|-----------|-----------|-----------|
| C  | 5.424293  | 2.992046  | 1.289363  | H            | -2.645019 | 0.854846  | -3.895657 |
| C  | 4.302004  | 2.183824  | 1.530721  | C            | -1.898262 | -0.645898 | -2.540738 |
| H  | 4.184405  | 1.719830  | 2.513408  | C            | -0.739264 | 0.193246  | -2.234841 |
| C  | -2.187860 | -0.297314 | 1.615325  | O            | -0.442925 | 1.295177  | -2.689793 |
| C  | -1.753821 | -1.035063 | 2.722655  | C            | 4.850646  | 3.969208  | -2.261772 |
| H  | -0.869434 | -0.731856 | 3.288696  | N            | 4.998574  | 4.461603  | -3.306125 |
| C  | -2.449196 | -2.184069 | 3.137085  | C            | 6.379471  | 3.208440  | 2.330602  |
| C  | -3.594224 | -2.606206 | 2.451193  | N            | 7.145596  | 3.384010  | 3.189600  |
| H  | -4.133545 | -3.498192 | 2.770292  | C            | 5.513914  | -2.885079 | -0.097070 |
| C  | -4.039487 | -1.859328 | 1.351427  | N            | 6.570211  | -3.178606 | -0.490415 |
| C  | -3.339646 | -0.718343 | 0.934563  | C            | 1.046717  | -4.113174 | 1.538607  |
| H  | -3.705709 | -0.167419 | 0.062584  | N            | 0.200318  | -4.864024 | 1.816979  |
| C  | -2.504848 | 2.302838  | 0.568116  | C            | -5.202649 | -2.278263 | 0.633715  |
| C  | -2.614666 | 2.856202  | -0.708798 | N            | -6.140069 | -2.624363 | 0.035705  |
| H  | -1.920763 | 2.557703  | -1.500648 | C            | -1.980553 | -2.911400 | 4.274954  |
| C  | -3.625526 | 3.792785  | -0.988172 | N            | -1.584676 | -3.484059 | 5.208399  |
| C  | -4.512626 | 4.195458  | 0.016008  | C            | -5.286362 | 4.053968  | 2.338187  |
| H  | -5.294798 | 4.924707  | -0.197828 | N            | -6.009726 | 4.378992  | 3.190903  |
| C  | -4.391297 | 3.647552  | 1.300569  | C            | -3.749688 | 4.326700  | -2.308412 |
| C  | -3.395722 | 2.695775  | 1.570839  | N            | -3.850372 | 4.753473  | -3.387041 |
| H  | -3.333443 | 2.264428  | 2.573714  |              |           |           |           |
| Ni | 0.208838  | 0.585499  | -0.643912 | <b>4(L5)</b> |           |           |           |
| O  | 0.764404  | -0.673430 | -2.137575 | P            | -1.413188 | 0.700916  | -0.996271 |
| C  | 1.003668  | -2.002658 | -2.141653 | P            | 1.628505  | 0.868384  | -0.914629 |
| C  | 2.216456  | -2.431949 | -2.704442 | C            | -0.548809 | 0.941152  | -2.618816 |
| H  | 2.895600  | -1.676794 | -3.107379 | H            | -0.421807 | -0.048378 | -3.086092 |
| C  | 2.533227  | -3.785618 | -2.746101 | H            | -1.167361 | 1.526146  | -3.315420 |
| H  | 3.483398  | -4.103873 | -3.183723 | C            | 0.797496  | 1.614973  | -2.384825 |
| C  | 1.640435  | -4.731438 | -2.236714 | H            | 0.661180  | 2.678568  | -2.129134 |
| H  | 1.881161  | -5.796266 | -2.272665 | H            | 1.433727  | 1.602553  | -3.283375 |
| C  | 0.438065  | -4.305374 | -1.676315 | C            | -2.187275 | -0.947987 | -1.093619 |
| H  | -0.257426 | -5.036635 | -1.253704 | C            | -3.493416 | -1.197318 | -0.665760 |
| C  | 0.108620  | -2.948250 | -1.604274 | H            | -4.153893 | -0.377833 | -0.371961 |
| C  | -1.144127 | -2.464986 | -0.940783 | C            | -3.971710 | -2.515964 | -0.593009 |
| H  | -0.861931 | -1.668642 | -0.222023 | C            | -3.144357 | -3.596608 | -0.927891 |
| H  | -1.609516 | -3.281037 | -0.368882 | H            | -3.514286 | -4.619405 | -0.852045 |
| C  | -2.137589 | -1.884692 | -1.905578 | C            | -1.832613 | -3.342701 | -1.343586 |
| C  | -3.327273 | -2.558131 | -2.194096 | C            | -1.362285 | -2.024902 | -1.428830 |
| H  | -3.523678 | -3.517346 | -1.705940 | H            | -0.323734 | -1.858755 | -1.728555 |
| C  | -4.272338 | -2.020248 | -3.066030 | C            | -2.810394 | 1.874304  | -0.949428 |
| H  | -5.204213 | -2.559480 | -3.252168 | C            | -3.067078 | 2.514926  | 0.266515  |
| C  | -4.033185 | -0.792385 | -3.684324 | H            | -2.440330 | 2.292629  | 1.137943  |
| H  | -4.767142 | -0.368894 | -4.373244 | C            | -4.130785 | 3.427550  | 0.365599  |
| C  | -2.852050 | -0.108611 | -3.422429 | C            | -4.922499 | 3.714517  | -0.752444 |

|    |           |           |           |                 |           |           |           |
|----|-----------|-----------|-----------|-----------------|-----------|-----------|-----------|
| H  | -5.739503 | 4.433215  | -0.678979 | C               | 2.600365  | -0.207530 | 3.962782  |
| C  | -4.660860 | 3.068381  | -1.968359 | H               | 3.088488  | 0.764865  | 4.060280  |
| C  | -3.609025 | 2.144209  | -2.064531 | C               | 1.649467  | -0.364915 | 2.937571  |
| H  | -3.432134 | 1.640481  | -3.018551 | C               | 1.431639  | 0.818996  | 2.058630  |
| C  | 2.185191  | -0.782731 | -1.489647 | O               | 1.934775  | 1.897457  | 2.286904  |
| C  | 2.196538  | -1.153997 | -2.836424 | C               | 2.445566  | -2.847235 | -4.587390 |
| H  | 1.981682  | -0.427550 | -3.623166 | N               | 2.418592  | -3.123635 | -5.718038 |
| C  | 2.469702  | -2.483534 | -3.205454 | C               | 2.989169  | -4.044092 | 0.141261  |
| C  | 2.735777  | -3.450835 | -2.229163 | N               | 3.156481  | -4.816049 | 0.996578  |
| H  | 2.906212  | -4.490012 | -2.512054 | C               | 6.866618  | 1.526776  | -0.785593 |
| C  | 2.755541  | -3.071322 | -0.880276 | N               | 7.921782  | 1.061588  | -0.946700 |
| C  | 2.483204  | -1.744439 | -0.516292 | C               | 3.992380  | 5.292323  | 0.469229  |
| H  | 2.483584  | -1.473205 | 0.543755  | N               | 3.863108  | 6.395521  | 0.818192  |
| C  | 3.152291  | 1.843981  | -0.689736 | C               | -5.460708 | 3.354525  | -3.117834 |
| C  | 3.013017  | 3.159405  | -0.231039 | N               | -6.105776 | 3.578109  | -4.061020 |
| H  | 2.022911  | 3.586647  | -0.056075 | C               | -4.400218 | 4.074943  | 1.611698  |
| C  | 4.146987  | 3.942372  | 0.025251  | N               | -4.622526 | 4.596153  | 2.628686  |
| C  | 5.429741  | 3.407502  | -0.151549 | C               | -5.311085 | -2.755682 | -0.154666 |
| H  | 6.312428  | 4.012407  | 0.057670  | N               | -6.406212 | -2.948546 | 0.191842  |
| C  | 5.566294  | 2.087385  | -0.594787 | C               | -0.919534 | -4.397536 | -1.651212 |
| C  | 4.428916  | 1.308637  | -0.865299 | N               | -0.113464 | -5.201915 | -1.897968 |
| H  | 4.565478  | 0.282008  | -1.212839 |                 |           |           |           |
| Ni | 0.157195  | 0.747984  | 0.641654  | <b>5-ts(L5)</b> |           |           |           |
| O  | -1.120148 | 0.760265  | 2.087851  | P               | -1.600049 | 0.624438  | -0.693079 |
| C  | -1.914683 | -0.264758 | 2.298477  | P               | 1.386373  | -0.051129 | -0.962567 |
| C  | -3.258253 | -0.051730 | 2.693464  | C               | -0.953972 | 0.334627  | -2.387833 |
| H  | -3.594109 | 0.978765  | 2.841402  | H               | -1.085788 | -0.744081 | -2.574895 |
| C  | -4.120931 | -1.117114 | 2.925543  | H               | -1.524972 | 0.882874  | -3.153807 |
| H  | -5.152779 | -0.918304 | 3.229262  | C               | 0.518825  | 0.719450  | -2.413348 |
| C  | -3.680126 | -2.434155 | 2.776299  | H               | 0.619272  | 1.813535  | -2.341666 |
| H  | -4.359654 | -3.270262 | 2.956021  | H               | 0.999859  | 0.425251  | -3.357665 |
| C  | -2.357829 | -2.663112 | 2.395564  | C               | -3.361580 | 0.184043  | -0.718867 |
| H  | -1.997070 | -3.691884 | 2.280703  | C               | -4.109248 | 0.411937  | 0.441292  |
| C  | -1.471373 | -1.612776 | 2.146771  | H               | -3.655536 | 0.889110  | 1.313866  |
| C  | -0.055677 | -1.881644 | 1.722292  | C               | -5.451874 | 0.014893  | 0.506706  |
| H  | 0.177895  | -1.293366 | 0.806734  | C               | -6.051436 | -0.625778 | -0.585695 |
| H  | 0.028944  | -2.938357 | 1.420308  | H               | -7.093306 | -0.942724 | -0.533336 |
| C  | 0.990357  | -1.605107 | 2.777589  | C               | -5.300294 | -0.855206 | -1.743553 |
| C  | 1.316900  | -2.643640 | 3.659257  | C               | -3.955762 | -0.451771 | -1.809966 |
| H  | 0.817028  | -3.609493 | 3.542287  | H               | -3.392901 | -0.656923 | -2.722567 |
| C  | 2.262277  | -2.477919 | 4.666070  | C               | -1.570301 | 2.453446  | -0.524807 |
| H  | 2.499386  | -3.313404 | 5.328834  | C               | -0.569326 | 2.996609  | 0.282679  |
| C  | 2.908665  | -1.250498 | 4.822396  | H               | 0.110764  | 2.322752  | 0.816778  |
| H  | 3.650144  | -1.111950 | 5.612411  | C               | -0.434226 | 4.387044  | 0.422426  |

|    |           |           |           |              |           |           |           |
|----|-----------|-----------|-----------|--------------|-----------|-----------|-----------|
| C  | -1.319298 | 5.244735  | -0.239046 | H            | 3.387870  | 0.886058  | 4.057786  |
| H  | -1.225041 | 6.325806  | -0.132571 | C            | 1.723509  | 0.319804  | 2.804015  |
| C  | -2.332701 | 4.699613  | -1.040933 | H            | 1.418697  | 1.357932  | 2.625353  |
| C  | -2.456882 | 3.307827  | -1.186056 | C            | 0.990666  | -0.730185 | 2.228702  |
| H  | -3.253814 | 2.908715  | -1.819471 | C            | -0.824175 | -0.156658 | 2.228452  |
| C  | 2.236482  | -1.501308 | -1.702225 | O            | -1.435933 | 0.052156  | 3.195872  |
| C  | 3.521991  | -1.414863 | -2.243541 | C            | -5.899984 | -1.500758 | -2.868955 |
| H  | 4.082714  | -0.477486 | -2.218438 | N            | -6.379624 | -2.019541 | -3.794419 |
| C  | 4.115526  | -2.541212 | -2.835309 | C            | -6.208446 | 0.247301  | 1.696931  |
| C  | 3.420149  | -3.755215 | -2.895179 | N            | -6.831216 | 0.438823  | 2.661706  |
| H  | 3.881091  | -4.630301 | -3.354861 | C            | 1.413213  | -5.069816 | -2.416409 |
| C  | 2.128915  | -3.832916 | -2.359501 | N            | 0.834124  | -6.078475 | -2.468791 |
| C  | 1.533660  | -2.710240 | -1.759179 | C            | 5.431763  | -2.440174 | -3.383220 |
| H  | 0.527649  | -2.778894 | -1.319298 | N            | 6.503055  | -2.345825 | -3.829631 |
| C  | 2.754514  | 1.062033  | -0.496815 | C            | 5.638610  | 0.853532  | 1.863548  |
| C  | 2.815916  | 2.409889  | -0.859317 | N            | 6.375166  | 0.399691  | 2.642793  |
| H  | 2.102204  | 2.843770  | -1.562302 | C            | 3.842644  | 4.621655  | -0.725294 |
| C  | 3.813987  | 3.247824  | -0.333013 | N            | 3.840091  | 5.736742  | -1.060094 |
| C  | 4.761967  | 2.744917  | 0.564572  | C            | -3.241339 | 5.567666  | -1.723096 |
| H  | 5.530271  | 3.397131  | 0.979885  | N            | -3.982750 | 6.267103  | -2.285645 |
| C  | 4.705390  | 1.392114  | 0.924709  | C            | 0.621145  | 4.896236  | 1.240881  |
| C  | 3.707084  | 0.559200  | 0.401150  | N            | 1.509409  | 5.262814  | 1.898797  |
| H  | 3.678236  | -0.489040 | 0.712043  |              |           |           |           |
| Ni | -0.179957 | -0.402192 | 0.637087  | <b>6(L5)</b> |           |           |           |
| O  | -1.039166 | -2.164620 | -0.191117 | P            | -1.392674 | 0.105386  | 0.820763  |
| C  | -1.640537 | -2.733861 | 0.834566  | P            | 1.621184  | 0.660402  | 0.606910  |
| C  | -3.049307 | -2.855694 | 0.898596  | C            | -0.525702 | 0.918418  | 2.250053  |
| H  | -3.632769 | -2.527030 | 0.033925  | H            | -0.542766 | 2.010021  | 2.103006  |
| C  | -3.686792 | -3.371906 | 2.023104  | H            | -1.054881 | 0.717650  | 3.193511  |
| H  | -4.779794 | -3.433645 | 2.040988  | C            | 0.910805  | 0.423661  | 2.286862  |
| C  | -2.946535 | -3.808699 | 3.122581  | H            | 0.950961  | -0.656172 | 2.504382  |
| H  | -3.444081 | -4.211225 | 4.007464  | H            | 1.506377  | 0.939007  | 3.056832  |
| C  | -1.553919 | -3.745863 | 3.059970  | C            | -2.833668 | 1.149761  | 0.430321  |
| H  | -0.957371 | -4.116121 | 3.901199  | C            | -3.855086 | 0.596399  | -0.356373 |
| C  | -0.891362 | -3.233696 | 1.943957  | H            | -3.828690 | -0.457998 | -0.642611 |
| C  | 0.610991  | -3.237632 | 1.868140  | C            | -4.928326 | 1.388140  | -0.789475 |
| H  | 0.894474  | -3.279475 | 0.801784  | C            | -4.996925 | 2.743477  | -0.441390 |
| H  | 1.001111  | -4.161147 | 2.321058  | H            | -5.830257 | 3.359203  | -0.779967 |
| C  | 1.338403  | -2.072544 | 2.489200  | C            | -3.982485 | 3.295042  | 0.348864  |
| C  | 2.462888  | -2.305553 | 3.294840  | C            | -2.904973 | 2.501431  | 0.777499  |
| H  | 2.762798  | -3.340678 | 3.484753  | H            | -2.136473 | 2.972471  | 1.393272  |
| C  | 3.199527  | -1.261186 | 3.850933  | C            | -2.118440 | -1.366417 | 1.647133  |
| H  | 4.069083  | -1.479889 | 4.475407  | C            | -1.299953 | -2.491240 | 1.804978  |
| C  | 2.825904  | 0.060982  | 3.613167  | H            | -0.302587 | -2.509743 | 1.343581  |

|    |           |           |           |               |           |           |           |
|----|-----------|-----------|-----------|---------------|-----------|-----------|-----------|
| C  | -1.769754 | -3.603464 | 2.523725  | C             | -3.031086 | -0.180306 | -3.574639 |
| C  | -3.056204 | -3.603087 | 3.075649  | H             | -3.561314 | 0.618265  | -4.100432 |
| H  | -3.421287 | -4.470303 | 3.626919  | C             | -1.981037 | 0.130177  | -2.708262 |
| C  | -3.870471 | -2.475711 | 2.911920  | H             | -1.714368 | 1.184348  | -2.565271 |
| C  | -3.400457 | -1.357959 | 2.203472  | C             | -1.282682 | -0.869679 | -2.019095 |
| H  | -4.053524 | -0.487588 | 2.107836  | C             | 0.940624  | 0.260449  | -2.299814 |
| C  | 1.741594  | 2.486851  | 0.474481  | O             | 1.480559  | 0.518381  | -3.280673 |
| C  | 2.730011  | 3.233092  | 1.122967  | C             | 5.471040  | -2.365553 | 2.491458  |
| H  | 3.514928  | 2.740537  | 1.703074  | N             | 5.803522  | -3.158269 | 3.276469  |
| C  | 2.728625  | 4.634490  | 1.031325  | C             | 6.469525  | 0.547650  | -1.319287 |
| C  | 1.729026  | 5.298958  | 0.306135  | N             | 7.214604  | 0.957048  | -2.114508 |
| H  | 1.726200  | 6.387489  | 0.244275  | C             | -0.930439 | -4.749734 | 2.684291  |
| C  | 0.737416  | 4.550198  | -0.337747 | N             | -0.249254 | -5.683649 | 2.822735  |
| C  | 0.756280  | 3.148015  | -0.262620 | C             | -5.183579 | -2.452236 | 3.475107  |
| H  | -0.009883 | 2.565121  | -0.786578 | N             | -6.253448 | -2.420651 | 3.933569  |
| C  | 3.338429  | 0.084528  | 0.658826  | C             | -5.942994 | 0.806454  | -1.611213 |
| C  | 3.743905  | -0.892144 | 1.571834  | N             | -6.758203 | 0.325596  | -2.289223 |
| H  | 3.050823  | -1.296454 | 2.310303  | C             | -4.037977 | 4.667191  | 0.743040  |
| C  | 5.059778  | -1.380202 | 1.541904  | N             | -4.067164 | 5.780396  | 1.083022  |
| C  | 5.968085  | -0.908780 | 0.586374  | C             | -0.309559 | 5.188534  | -1.072002 |
| H  | 6.988673  | -1.291170 | 0.561189  | N             | -1.189284 | 5.666048  | -1.666724 |
| C  | 5.552822  | 0.057803  | -0.338466 | C             | 3.748931  | 5.386371  | 1.692097  |
| C  | 4.239246  | 0.549724  | -0.304086 | N             | 4.581669  | 5.990517  | 2.236699  |
| H  | 3.932915  | 1.292401  | -1.045596 |               |           |           |           |
| Ni | 0.149644  | -0.266941 | -0.799305 | <b>10(L5)</b> |           |           |           |
| O  | 1.073839  | -1.999396 | -0.049477 | P             | -1.586342 | 0.590429  | 0.953839  |
| C  | 1.511754  | -2.702991 | -1.081793 | P             | 1.437450  | 0.609710  | 0.939297  |
| C  | 2.885434  | -2.774099 | -1.408623 | C             | -0.764751 | 1.225728  | 2.483850  |
| H  | 3.599253  | -2.246004 | -0.772790 | H             | -0.720837 | 2.318196  | 2.354746  |
| C  | 3.335839  | -3.499021 | -2.508229 | H             | -1.374187 | 1.056579  | 3.385156  |
| H  | 4.406523  | -3.530103 | -2.730550 | C             | 0.646211  | 0.667055  | 2.617380  |
| C  | 2.433280  | -4.181958 | -3.323451 | H             | 0.638949  | -0.353849 | 3.030306  |
| H  | 2.782093  | -4.751164 | -4.187761 | H             | 1.241344  | 1.271352  | 3.317834  |
| C  | 1.074146  | -4.133792 | -3.009484 | C             | -3.108526 | 1.596468  | 0.806408  |
| H  | 0.353753  | -4.671878 | -3.635340 | C             | -4.356539 | 1.027180  | 0.545372  |
| C  | 0.600441  | -3.419122 | -1.908884 | H             | -4.487382 | -0.056138 | 0.520388  |
| C  | -0.865332 | -3.367345 | -1.586431 | C             | -5.474044 | 1.842191  | 0.301288  |
| H  | -0.981484 | -3.302660 | -0.493976 | C             | -5.355156 | 3.235980  | 0.329394  |
| H  | -1.346007 | -4.307125 | -1.893732 | H             | -6.222876 | 3.868390  | 0.140083  |
| C  | -1.609396 | -2.221058 | -2.231148 | C             | -4.107369 | 3.807664  | 0.605766  |
| C  | -2.680652 | -2.511084 | -3.093616 | C             | -2.989914 | 2.990363  | 0.833335  |
| H  | -2.954057 | -3.560289 | -3.246383 | H             | -2.028706 | 3.474710  | 1.022844  |
| C  | -3.390971 | -1.512294 | -3.756724 | C             | -2.161552 | -1.095697 | 1.381757  |
| H  | -4.218225 | -1.776731 | -4.419586 | C             | -2.674604 | -1.914310 | 0.366789  |

|    |           |           |           |                  |           |           |           |
|----|-----------|-----------|-----------|------------------|-----------|-----------|-----------|
| H  | -2.831421 | -1.513404 | -0.637171 | H                | -3.865239 | -0.852466 | -4.779492 |
| C  | -2.968458 | -3.263071 | 0.613775  | C                | -3.347932 | 0.771522  | -3.450777 |
| C  | -2.751773 | -3.816812 | 1.881503  | H                | -4.125973 | 1.442764  | -3.824616 |
| H  | -2.942745 | -4.874182 | 2.065540  | C                | -2.489847 | 1.200634  | -2.434474 |
| C  | -2.266395 | -2.994429 | 2.904781  | H                | -2.618369 | 2.211049  | -2.029786 |
| C  | -1.978174 | -1.641641 | 2.657096  | C                | -1.494312 | 0.357113  | -1.938229 |
| H  | -1.597867 | -1.037952 | 3.482894  | C                | -0.159841 | 2.757164  | -0.993386 |
| C  | 2.885140  | 1.722706  | 0.949732  | O                | -0.256333 | 3.852315  | -1.317004 |
| C  | 3.699720  | 1.857495  | 2.076128  | C                | 5.630195  | 2.859921  | 3.205113  |
| H  | 3.496730  | 1.292696  | 2.989464  | N                | 6.290105  | 2.971307  | 4.157904  |
| C  | 4.807959  | 2.719202  | 2.044365  | C                | 4.608363  | 4.003549  | -1.449356 |
| C  | 5.109966  | 3.435641  | 0.879434  | N                | 4.860067  | 4.590566  | -2.422563 |
| H  | 5.971946  | 4.103075  | 0.854464  | C                | 0.969781  | -4.535083 | 1.356642  |
| C  | 4.300204  | 3.283540  | -0.252975 | N                | 0.197751  | -5.362498 | 1.633804  |
| C  | 3.187188  | 2.427502  | -0.219340 | C                | 5.289157  | -2.808654 | -0.247925 |
| H  | 2.574585  | 2.281433  | -1.114777 | N                | 6.377238  | -2.972525 | -0.628630 |
| C  | 2.181610  | -1.055783 | 0.836704  | C                | -3.453244 | -4.075453 | -0.458443 |
| C  | 1.375498  | -2.149305 | 1.159846  | N                | -3.838865 | -4.718414 | -1.349071 |
| H  | 0.351492  | -1.994818 | 1.511832  | C                | -2.028191 | -3.534001 | 4.206806  |
| C  | 1.851946  | -3.460519 | 1.027153  | N                | -1.822663 | -3.955234 | 5.272666  |
| C  | 3.153536  | -3.690157 | 0.564863  | C                | -6.741281 | 1.240875  | 0.025722  |
| H  | 3.532347  | -4.706851 | 0.458431  | N                | -7.772831 | 0.748922  | -0.196085 |
| C  | 3.959051  | -2.595128 | 0.229892  | C                | -3.962564 | 5.228777  | 0.655999  |
| C  | 3.471044  | -1.282506 | 0.350863  | N                | -3.834790 | 6.384884  | 0.705836  |
| H  | 4.119043  | -0.450445 | 0.065951  |                  |           |           |           |
| Ni | -0.130806 | 0.908853  | -0.647190 | <b>11-ts(L5)</b> |           |           |           |
| O  | 1.360904  | 0.474543  | -1.886829 | P                | 1.541002  | 0.670012  | 0.842850  |
| C  | 1.779579  | -0.613726 | -2.489287 | P                | -1.524942 | 0.508602  | 0.946375  |
| C  | 3.053283  | -0.593402 | -3.110644 | C                | 0.755092  | 0.700343  | 2.529419  |
| H  | 3.624690  | 0.339166  | -3.069806 | H                | 0.820307  | -0.307804 | 2.967865  |
| C  | 3.562358  | -1.710164 | -3.762670 | H                | 1.338463  | 1.352568  | 3.196061  |
| H  | 4.550760  | -1.655501 | -4.228137 | C                | -0.693415 | 1.182997  | 2.445703  |
| C  | 2.824633  | -2.894638 | -3.820714 | H                | -0.715769 | 2.276986  | 2.314610  |
| H  | 3.219979  | -3.775424 | -4.331279 | H                | -1.242217 | 0.974045  | 3.377178  |
| C  | 1.567342  | -2.929556 | -3.217297 | C                | 2.228001  | -1.015033 | 0.687208  |
| H  | 0.972966  | -3.849311 | -3.255854 | C                | 3.453358  | -1.268841 | 0.060277  |
| C  | 1.029460  | -1.821613 | -2.556399 | H                | 4.098967  | -0.447408 | -0.259643 |
| C  | -0.321576 | -1.893692 | -1.905050 | C                | 3.874129  | -2.587938 | -0.168650 |
| H  | -0.214167 | -1.670082 | -0.825070 | C                | 3.066955  | -3.672158 | 0.204531  |
| H  | -0.696077 | -2.927547 | -1.975014 | H                | 3.391715  | -4.694933 | 0.011430  |
| C  | -1.348288 | -0.940420 | -2.461841 | C                | 1.833645  | -3.418416 | 0.811622  |
| C  | -2.206013 | -1.350503 | -3.493112 | C                | 1.422471  | -2.098397 | 1.052526  |
| H  | -2.093835 | -2.359943 | -3.903147 | H                | 0.449075  | -1.937527 | 1.520130  |
| C  | -3.200858 | -0.507239 | -3.983812 | C                | 3.042765  | 1.714849  | 0.946528  |

|    |           |           |           |               |           |           |           |
|----|-----------|-----------|-----------|---------------|-----------|-----------|-----------|
| C  | 3.245669  | 2.659957  | -0.061169 | C             | -3.322459 | -0.218258 | -3.808569 |
| H  | 2.521683  | 2.754907  | -0.876759 | H             | -4.221473 | -0.509303 | -4.355348 |
| C  | 4.382364  | 3.486553  | -0.039303 | C             | -2.917255 | 1.119610  | -3.786324 |
| C  | 5.316318  | 3.368682  | 0.996065  | H             | -3.498051 | 1.877749  | -4.318051 |
| H  | 6.197816  | 4.010555  | 1.017204  | C             | -1.779273 | 1.503694  | -3.080084 |
| C  | 5.112826  | 2.416888  | 2.004698  | H             | -1.456810 | 2.547484  | -3.073090 |
| C  | 3.979901  | 1.589375  | 1.976647  | C             | -1.089538 | 0.536518  | -2.337624 |
| H  | 3.846916  | 0.843921  | 2.765518  | C             | -0.398254 | 2.919105  | -0.597756 |
| C  | -2.095078 | -1.168300 | 1.449589  | O             | -0.691103 | 4.014331  | -0.382730 |
| C  | -1.781564 | -1.739072 | 2.689106  | C             | 0.943774  | -4.477801 | 1.168533  |
| H  | -1.278957 | -1.162637 | 3.468672  | N             | 0.168301  | -5.296249 | 1.463342  |
| C  | -2.096335 | -3.082232 | 2.960916  | C             | 5.127995  | -2.824020 | -0.812308 |
| C  | -2.746753 | -3.869413 | 2.005260  | N             | 6.151135  | -3.008847 | -1.337516 |
| H  | -2.963878 | -4.918066 | 2.207078  | C             | -3.742987 | -4.063619 | -0.234049 |
| C  | -3.092139 | -3.290493 | 0.777104  | N             | -4.259477 | -4.671847 | -1.082116 |
| C  | -2.766780 | -1.954619 | 0.504074  | C             | -1.716835 | -3.649501 | 4.216983  |
| H  | -3.025471 | -1.544682 | -0.475780 | N             | -1.394469 | -4.096266 | 5.242905  |
| C  | -3.112824 | 1.408867  | 0.810646  | C             | -5.792475 | 1.751546  | -1.767905 |
| C  | -3.583661 | 2.280429  | 1.794970  | N             | -6.374985 | 1.602332  | -2.765154 |
| H  | -3.033413 | 2.433799  | 2.725885  | C             | -5.259520 | 3.860150  | 2.626155  |
| C  | -4.790235 | 2.976285  | 1.605891  | N             | -5.632188 | 4.576899  | 3.464887  |
| C  | -5.534187 | 2.802539  | 0.433184  | C             | 4.584252  | 4.448454  | -1.076933 |
| H  | -6.469630 | 3.343632  | 0.288115  | N             | 4.747402  | 5.228632  | -1.925410 |
| C  | -5.058204 | 1.931374  | -0.554362 | C             | 6.062126  | 2.283319  | 3.064921  |
| C  | -3.849252 | 1.244454  | -0.369185 | N             | 6.826392  | 2.168304  | 3.935707  |
| H  | -3.488657 | 0.588179  | -1.166615 |               |           |           |           |
| Ni | -0.101396 | 1.130000  | -0.671415 | <b>12(L5)</b> |           |           |           |
| O  | 0.780350  | 0.728716  | -2.409561 | P             | -1.566160 | -0.103396 | 0.033229  |
| C  | 1.454358  | -0.400418 | -2.669710 | P             | 1.476432  | -0.128442 | 0.010155  |
| C  | 2.742762  | -0.262451 | -3.220762 | C             | -0.744617 | -0.520223 | -1.582927 |
| H  | 3.127160  | 0.746185  | -3.392113 | H             | -0.630992 | -1.617195 | -1.619032 |
| C  | 3.493465  | -1.386360 | -3.546789 | H             | -1.364217 | -0.233599 | -2.447765 |
| H  | 4.497157  | -1.263599 | -3.962730 | C             | 0.617698  | 0.151341  | -1.624369 |
| C  | 2.967401  | -2.665546 | -3.353498 | H             | 0.496760  | 1.238163  | -1.763470 |
| H  | 3.552505  | -3.548539 | -3.620087 | H             | 1.225856  | -0.207170 | -2.469790 |
| C  | 1.691244  | -2.802754 | -2.811208 | C             | -3.233714 | -0.844871 | -0.120037 |
| H  | 1.266164  | -3.800952 | -2.661884 | C             | -4.215536 | -0.440230 | 0.793549  |
| C  | 0.923457  | -1.692106 | -2.448619 | H             | -3.990198 | 0.327142  | 1.539270  |
| C  | -0.449754 | -1.834158 | -1.858761 | C             | -5.493562 | -1.013953 | 0.770374  |
| H  | -0.389979 | -1.676845 | -0.759225 | C             | -5.799930 | -2.021027 | -0.156156 |
| H  | -0.821971 | -2.859146 | -2.005996 | H             | -6.790657 | -2.475500 | -0.171561 |
| C  | -1.393001 | -0.830690 | -2.453152 | C             | -4.816422 | -2.436188 | -1.059104 |
| C  | -2.546054 | -1.183556 | -3.163284 | C             | -3.540715 | -1.844500 | -1.046762 |
| H  | -2.821189 | -2.241915 | -3.224705 | H             | -2.804354 | -2.185890 | -1.776478 |



|    |           |           |           |              |           |           |           |
|----|-----------|-----------|-----------|--------------|-----------|-----------|-----------|
| C  | -1.902996 | 1.692124  | -0.183122 | C            | 4.232785  | -3.986041 | -2.368934 |
| C  | -1.236835 | 2.565564  | 0.681143  | N            | 4.984583  | -4.287891 | -3.205314 |
| H  | -0.592719 | 2.155101  | 1.471507  |              |           |           |           |
| C  | -1.391062 | 3.955023  | 0.546900  | <b>2(L6)</b> |           |           |           |
| C  | -2.230007 | 4.472683  | -0.448136 | Ni           | -0.498404 | -0.666556 | 0.432355  |
| H  | -2.357368 | 5.550740  | -0.552114 | P            | 0.323409  | 1.246844  | 0.046654  |
| C  | -2.906641 | 3.595489  | -1.305907 | P            | 1.476247  | -1.498914 | 0.182501  |
| C  | -2.739318 | 2.206029  | -1.176162 | O            | -1.086477 | 4.484750  | -1.308465 |
| H  | -3.272719 | 1.537860  | -1.857875 | O            | 0.450204  | 4.006332  | 0.382270  |
| C  | 2.057611  | -1.859927 | -0.206330 | O            | -1.309584 | 2.222489  | -1.843254 |
| C  | 2.952931  | -2.248571 | -1.206093 | O            | 5.176289  | 3.091867  | 1.146803  |
| H  | 3.390784  | -1.510220 | -1.883504 | O            | 6.174506  | 0.698802  | 1.244269  |
| C  | 3.308775  | -3.599781 | -1.348690 | O            | 3.486098  | -3.407356 | 0.467756  |
| C  | 2.757530  | -4.569600 | -0.500016 | O            | 2.654789  | -4.800782 | -1.209526 |
| H  | 3.030359  | -5.619286 | -0.614389 | O            | 0.923021  | -3.320192 | -1.714279 |
| C  | 1.855442  | -4.179021 | 0.496431  | O            | -3.018944 | -0.058705 | 1.567531  |
| C  | 1.515284  | -2.824637 | 0.645417  | C            | -0.274281 | 2.850950  | 0.821190  |
| H  | 0.818018  | -2.512270 | 1.431903  | C            | -1.736794 | 2.996259  | 0.433922  |
| C  | 3.006448  | 0.865220  | -0.142077 | H            | -2.186211 | 3.843632  | 0.973243  |
| C  | 2.968459  | 2.151515  | -0.691305 | H            | -2.299144 | 2.087034  | 0.689659  |
| H  | 2.047563  | 2.558438  | -1.114747 | C            | -1.800701 | 3.286087  | -1.057783 |
| C  | 4.117413  | 2.957938  | -0.709967 | C            | 0.274957  | 4.318121  | -0.985609 |
| C  | 5.322633  | 2.488812  | -0.175100 | C            | 0.864836  | 3.252229  | -1.896362 |
| H  | 6.215968  | 3.113293  | -0.191736 | H            | 0.755517  | 3.587606  | -2.939161 |
| C  | 5.359879  | 1.206854  | 0.388081  | H            | 1.937663  | 3.111087  | -1.702760 |
| C  | 4.209152  | 0.404723  | 0.408088  | C            | 0.085719  | 1.968008  | -1.686534 |
| H  | 4.268587  | -0.586784 | 0.863928  | C            | 2.128590  | 1.152929  | 0.367430  |
| Ni | -0.027479 | -0.138622 | 1.572136  | C            | 2.966381  | 2.255771  | 0.608422  |
| C  | 0.097485  | -0.297495 | 3.316381  | H            | 2.541515  | 3.258820  | 0.587645  |
| O  | 0.205895  | -0.414285 | 4.463576  | C            | 4.316572  | 2.087265  | 0.901708  |
| C  | 4.051067  | 4.261584  | -1.292592 | C            | 4.691461  | 4.410271  | 1.063880  |
| N  | 3.983703  | 5.319626  | -1.774020 | H            | 4.289857  | 4.639167  | 0.062529  |
| C  | 6.578703  | 0.705930  | 0.942313  | H            | 5.542356  | 5.071492  | 1.259604  |
| N  | 7.568258  | 0.292616  | 1.395604  | H            | 3.909061  | 4.612158  | 1.813556  |
| C  | -0.690242 | 4.836608  | 1.426448  | C            | 4.863074  | 0.776908  | 0.959417  |
| N  | -0.109252 | 5.545063  | 2.144963  | C            | 6.753617  | -0.581174 | 1.333370  |
| C  | -3.766010 | 4.117411  | -2.321884 | H            | 6.292401  | -1.186893 | 2.129899  |
| N  | -4.465213 | 4.533943  | -3.154609 | H            | 7.812433  | -0.432298 | 1.570442  |
| C  | -6.488547 | -0.574038 | 1.698069  | H            | 6.681078  | -1.133131 | 0.381592  |
| N  | -7.297298 | -0.212467 | 2.453511  | C            | 4.036010  | -0.317926 | 0.724603  |
| C  | -5.109768 | -3.461531 | -2.010938 | H            | 4.442010  | -1.328639 | 0.781773  |
| N  | -5.341210 | -4.295236 | -2.790220 | C            | 2.673054  | -0.145954 | 0.428904  |
| C  | 1.279987  | -5.157834 | 1.364190  | C            | 3.535902  | -3.743600 | -0.904399 |
| N  | 0.801767  | -5.951633 | 2.068947  | C            | 1.319201  | -4.426929 | -0.929587 |

|                 |           |           |           |   |           |           |           |
|-----------------|-----------|-----------|-----------|---|-----------|-----------|-----------|
| C               | 1.192235  | -4.162932 | 0.564031  | P | -0.181181 | 1.379542  | -0.297442 |
| H               | 0.161625  | -3.873373 | 0.814801  | P | 1.432869  | -1.126175 | -0.621319 |
| H               | 1.435353  | -5.089389 | 1.104824  | O | -1.700158 | 4.658700  | -1.463641 |
| C               | 2.178448  | -3.062464 | 0.937538  | O | -0.445593 | 4.080337  | 0.415429  |
| C               | 1.757833  | -2.173260 | -1.560354 | O | -1.565159 | 2.489939  | -2.319697 |
| C               | 3.205042  | -2.559624 | -1.799089 | O | 4.004795  | 3.462655  | 2.206390  |
| H               | 3.884329  | -1.716710 | -1.607509 | O | 5.354325  | 1.252617  | 2.017172  |
| H               | 3.340452  | -2.867037 | -2.847220 | O | 3.495884  | -2.881516 | 0.006534  |
| C               | -4.300996 | -0.435440 | 1.886282  | O | 3.396762  | -4.021765 | -2.026372 |
| C               | -4.552466 | -1.225890 | 3.005163  | O | 1.715193  | -2.615647 | -2.831092 |
| H               | -3.710718 | -1.572328 | 3.608144  | O | -1.930595 | -2.239853 | 0.067872  |
| C               | -5.869552 | -1.554366 | 3.327325  | C | -1.082153 | 2.803166  | 0.555830  |
| H               | -6.075344 | -2.173362 | 4.204215  | C | -2.461687 | 2.869905  | -0.083945 |
| C               | -6.918744 | -1.100376 | 2.529236  | H | -3.106992 | 3.569057  | 0.469190  |
| H               | -7.949936 | -1.360935 | 2.779007  | H | -2.946972 | 1.886313  | -0.089740 |
| C               | -6.652861 | -0.308343 | 1.410643  | C | -2.301133 | 3.376948  | -1.509184 |
| H               | -7.476257 | 0.054857  | 0.788336  | C | -0.408368 | 4.568503  | -0.910738 |
| C               | -5.342375 | 0.038997  | 1.076875  | C | 0.453597  | 3.703626  | -1.815695 |
| C               | -4.976736 | 0.915310  | -0.085191 | H | 0.501944  | 4.179166  | -2.807484 |
| H               | -4.427040 | 1.790577  | 0.307579  | H | 1.480311  | 3.630578  | -1.429230 |
| H               | -5.888245 | 1.319977  | -0.547664 | C | -0.198151 | 2.338428  | -1.928960 |
| C               | -4.150348 | 0.231685  | -1.149106 | C | 1.545802  | 1.434326  | 0.335243  |
| C               | -4.533639 | 0.383689  | -2.488750 | C | 2.120159  | 2.532527  | 0.999475  |
| H               | -5.405495 | 1.006027  | -2.713776 | H | 1.544759  | 3.452372  | 1.099213  |
| C               | -3.854568 | -0.243518 | -3.528764 | C | 3.397120  | 2.458074  | 1.550557  |
| H               | -4.181429 | -0.100722 | -4.561707 | C | 3.320514  | 4.687124  | 2.318722  |
| C               | -2.771987 | -1.073095 | -3.234285 | H | 3.111838  | 5.133810  | 1.332090  |
| H               | -2.240218 | -1.595960 | -4.033428 | H | 3.975452  | 5.363436  | 2.878478  |
| C               | -2.376564 | -1.240429 | -1.915118 | H | 2.370526  | 4.582369  | 2.867629  |
| H               | -1.534298 | -1.895611 | -1.669070 | C | 4.137774  | 1.251573  | 1.443285  |
| C               | -3.030401 | -0.579835 | -0.856380 | C | 6.116601  | 0.072200  | 1.947740  |
| C               | -2.429949 | -0.774988 | 0.490764  | H | 5.615179  | -0.773532 | 2.446097  |
| O               | -1.868163 | -1.904459 | 0.782026  | H | 7.060277  | 0.274625  | 2.465950  |
| H               | 4.552805  | -4.123608 | -1.076559 | H | 6.341074  | -0.212864 | 0.906128  |
| H               | 0.684487  | -5.261129 | -1.256401 | C | 3.576947  | 0.166961  | 0.775783  |
| H               | 1.402377  | -1.435894 | -2.295778 | H | 4.128315  | -0.771077 | 0.712644  |
| H               | 0.753573  | 5.297870  | -1.126949 | C | 2.291587  | 0.245135  | 0.212869  |
| H               | 0.339508  | 1.204628  | -2.436655 | C | 3.999009  | -2.966926 | -1.313355 |
| H               | -2.828976 | 3.455739  | -1.405482 | C | 2.000364  | -3.808142 | -2.135821 |
| H               | -0.138618 | 2.807585  | 1.911589  | C | 1.398057  | -3.829191 | -0.737819 |
| H               | 2.270254  | -2.944593 | 2.027017  | H | 0.311998  | -3.660448 | -0.786184 |
|                 |           |           |           | H | 1.581302  | -4.816667 | -0.288336 |
| <b>3-ts(L6)</b> |           |           |           | C | 2.074100  | -2.738663 | 0.083524  |
| Ni              | -0.679196 | -0.667844 | -0.569471 | C | 2.309631  | -1.449994 | -2.261339 |

|              |           |           |           |   |           |           |           |
|--------------|-----------|-----------|-----------|---|-----------|-----------|-----------|
| C            | 3.799313  | -1.674952 | -2.090858 | O | 5.307363  | 2.556552  | 1.242961  |
| H            | 4.281644  | -0.826106 | -1.586462 | O | 6.001522  | 0.058245  | 1.161327  |
| H            | 4.272084  | -1.788951 | -3.078365 | O | 2.899719  | -3.588304 | 0.165008  |
| C            | -2.244020 | -2.559724 | 1.346945  | O | 1.980331  | -4.836760 | -1.578519 |
| C            | -2.000417 | -3.887666 | 1.731985  | O | 0.429377  | -3.167663 | -2.080172 |
| H            | -1.605390 | -4.578336 | 0.983672  | O | -2.000239 | -1.920056 | -0.233071 |
| C            | -2.263947 | -4.308626 | 3.030798  | C | -0.109370 | 2.853737  | 1.102870  |
| H            | -2.067847 | -5.346668 | 3.311642  | C | -1.535601 | 3.297175  | 0.845407  |
| C            | -2.781555 | -3.411421 | 3.965656  | H | -1.845535 | 4.029593  | 1.605324  |
| H            | -2.991423 | -3.733237 | 4.988141  | H | -2.230960 | 2.449716  | 0.881075  |
| C            | -3.032248 | -2.096569 | 3.579963  | C | -1.574886 | 3.963940  | -0.519773 |
| H            | -3.438408 | -1.383885 | 4.304416  | C | 0.618158  | 4.660371  | -0.299337 |
| C            | -2.768297 | -1.647197 | 2.282436  | C | 1.045455  | 3.811368  | -1.487004 |
| C            | -3.033642 | -0.230659 | 1.873831  | H | 0.943042  | 4.418682  | -2.398905 |
| H            | -2.093613 | 0.192646  | 1.461243  | H | 2.097794  | 3.505524  | -1.412286 |
| H            | -3.310491 | 0.368056  | 2.752942  | C | 0.115868  | 2.617113  | -1.566108 |
| C            | -4.088361 | -0.109608 | 0.813415  | C | 2.067903  | 1.082557  | 0.239618  |
| C            | -5.336278 | 0.453522  | 1.089812  | C | 3.033714  | 2.046386  | 0.586844  |
| H            | -5.559032 | 0.770184  | 2.113028  | H | 2.742370  | 3.090406  | 0.663369  |
| C            | -6.282618 | 0.640409  | 0.082863  | C | 4.342609  | 1.689223  | 0.892595  |
| H            | -7.249179 | 1.091176  | 0.321419  | C | 4.970507  | 3.920305  | 1.332255  |
| C            | -5.988339 | 0.264592  | -1.228263 | H | 4.646619  | 4.329935  | 0.360626  |
| H            | -6.723560 | 0.413855  | -2.022539 | H | 5.876640  | 4.448388  | 1.647662  |
| C            | -4.756130 | -0.309328 | -1.520694 | H | 4.178041  | 4.102851  | 2.076317  |
| H            | -4.500882 | -0.610521 | -2.539039 | C | 4.721385  | 0.321639  | 0.857562  |
| C            | -3.807042 | -0.514673 | -0.508140 | C | 6.419590  | -1.287227 | 1.156108  |
| C            | -2.500460 | -1.053600 | -0.905502 | H | 5.873188  | -1.890499 | 1.898700  |
| O            | -2.124907 | -1.346147 | -2.046701 | H | 7.483098  | -1.285789 | 1.417225  |
| H            | 1.609040  | -4.617510 | -2.766304 | H | 6.301609  | -1.751956 | 0.163340  |
| H            | 5.061507  | -3.226473 | -1.204757 | C | 3.767897  | -0.637052 | 0.531392  |
| H            | 2.093939  | -0.625954 | -2.957079 | H | 4.039781  | -1.692470 | 0.529688  |
| H            | 0.271515  | 1.719579  | -2.707553 | C | 2.445442  | -0.274576 | 0.220800  |
| H            | -0.028619 | 5.597196  | -0.832468 | C | 2.952664  | -3.887318 | -1.220307 |
| H            | -1.135431 | 2.615110  | 1.639341  | C | 0.680562  | -4.327837 | -1.321497 |
| H            | 1.818607  | -2.805479 | 1.151650  | C | 0.541038  | -4.100757 | 0.175817  |
| H            | -3.270071 | 3.502277  | -2.012458 | H | -0.460265 | -3.712402 | 0.404846  |
|              |           |           |           | H | 0.674320  | -5.064755 | 0.688251  |
|              |           |           |           | C | 1.623289  | -3.125390 | 0.614455  |
| <b>4(L6)</b> |           |           |           | C | 1.363917  | -2.119325 | -1.866787 |
| Ni           | -0.838153 | -0.378656 | -0.194216 | C | 2.772636  | -2.643730 | -2.078776 |
| P            | 0.299392  | 1.448241  | -0.091234 | H | 3.531913  | -1.884858 | -1.841988 |
| P            | 1.117985  | -1.471916 | -0.106671 | H | 2.903152  | -2.928431 | -3.133731 |
| O            | -0.708959 | 5.080668  | -0.500245 | C | -2.831936 | -2.341187 | 0.682700  |
| O            | 0.763697  | 3.973356  | 0.931635  | C | -3.194114 | -3.713883 | 0.704334  |
| O            | -1.238421 | 3.068849  | -1.560776 |   |           |           |           |

|                 |           |           |           |    |           |           |           |
|-----------------|-----------|-----------|-----------|----|-----------|-----------|-----------|
| H               | -2.779308 | -4.356497 | -0.077960 | C  | -1.409502 | 3.686469  | 0.536885  |
| C               | -4.058365 | -4.227834 | 1.661589  | H  | -1.706834 | 4.494014  | 1.221786  |
| H               | -4.313796 | -5.291645 | 1.638583  | H  | -2.200114 | 2.924680  | 0.541808  |
| C               | -4.599707 | -3.399414 | 2.648851  | C  | -1.244081 | 4.270021  | -0.857834 |
| H               | -5.273301 | -3.799542 | 3.409998  | C  | 0.994400  | 4.705045  | -0.459015 |
| C               | -4.271630 | -2.044763 | 2.634567  | C  | 1.408281  | 3.715751  | -1.538881 |
| H               | -4.700549 | -1.376916 | 3.390571  | H  | 1.491621  | 4.258481  | -2.492542 |
| C               | -3.410223 | -1.499215 | 1.678162  | H  | 2.390853  | 3.274576  | -1.319914 |
| C               | -3.142066 | -0.021713 | 1.645919  | C  | 0.327676  | 2.657177  | -1.646831 |
| H               | -2.060182 | 0.167428  | 1.468532  | C  | 1.914984  | 0.993333  | 0.270478  |
| H               | -3.378849 | 0.412816  | 2.629179  | C  | 2.938922  | 1.780803  | 0.825244  |
| C               | -3.959892 | 0.690174  | 0.596411  | H  | 2.744268  | 2.830145  | 1.042136  |
| C               | -5.212505 | 1.208614  | 0.952995  | C  | 4.182241  | 1.236328  | 1.129974  |
| H               | -5.554307 | 1.094082  | 1.986229  | C  | 5.005777  | 3.286919  | 1.957208  |
| C               | -6.021206 | 1.863273  | 0.029620  | H  | 4.775872  | 3.872447  | 1.051321  |
| H               | -6.989431 | 2.261577  | 0.343683  | H  | 5.944911  | 3.656239  | 2.382462  |
| C               | -5.595185 | 2.013401  | -1.292271 | H  | 4.199974  | 3.439638  | 2.693050  |
| H               | -6.226081 | 2.526735  | -2.022088 | C  | 4.422919  | -0.142081 | 0.878369  |
| C               | -4.362343 | 1.500801  | -1.668871 | C  | 5.922441  | -1.959049 | 0.986237  |
| H               | -3.993147 | 1.606268  | -2.692018 | H  | 5.257888  | -2.615331 | 1.570706  |
| C               | -3.539277 | 0.837817  | -0.742536 | H  | 6.955066  | -2.124139 | 1.311017  |
| C               | -2.216572 | 0.384268  | -1.235164 | H  | 5.842332  | -2.226788 | -0.080466 |
| O               | -1.934391 | 0.304716  | -2.411647 | C  | 3.408234  | -0.923527 | 0.334883  |
| H               | 3.931911  | -4.362032 | -1.376272 | H  | 3.571901  | -1.989712 | 0.182778  |
| H               | -0.028792 | -5.079877 | -1.691614 | C  | 2.152568  | -0.371506 | 0.025445  |
| H               | 1.696008  | -3.051194 | 1.709295  | C  | 2.272347  | -3.947292 | -1.642911 |
| H               | 1.225999  | 5.570477  | -0.196776 | C  | -0.025147 | -4.049999 | -1.928551 |
| H               | 0.238419  | 2.043440  | -2.496154 | C  | -0.245064 | -3.888418 | -0.432054 |
| H               | -2.575301 | 4.341453  | -0.770562 | H  | -1.215942 | -3.427175 | -0.209770 |
| H               | 0.043201  | 2.505700  | 2.135308  | H  | -0.239681 | -4.886727 | 0.030600  |
| H               | 1.103791  | -1.321171 | -2.577458 | C  | 0.904351  | -3.064147 | 0.118364  |
|                 |           |           |           | C  | 1.035983  | -1.938997 | -2.328122 |
|                 |           |           |           | C  | 2.357071  | -2.672371 | -2.466428 |
| <b>5-ts(L6)</b> |           |           |           | H  | 3.201253  | -2.044337 | -2.147022 |
| P               | 0.230204  | 1.592924  | -0.090484 | H  | 2.523211  | -2.945233 | -3.519338 |
| P               | 0.734219  | -1.339133 | -0.576400 | Ni | -1.101768 | -0.220910 | -0.169034 |
| O               | -0.245264 | 5.270706  | -0.814125 | O  | -0.912429 | -0.906425 | 1.830647  |
| O               | 0.941531  | 4.106165  | 0.823370  | C  | -1.945548 | -1.630534 | 2.159513  |
| O               | -0.938489 | 3.285199  | -1.824338 | C  | -1.826237 | -2.995268 | 2.539547  |
| O               | 5.203083  | 1.923002  | 1.667238  | H  | -0.821670 | -3.427093 | 2.595475  |
| O               | 5.642484  | -0.596317 | 1.207128  | C  | -2.940745 | -3.781767 | 2.813630  |
| O               | 2.144758  | -3.673683 | -0.258717 | H  | -2.801430 | -4.834532 | 3.081101  |
| O               | 1.203607  | -4.723974 | -2.125202 | C  | -4.229387 | -3.245937 | 2.749233  |
| O               | -0.047209 | -2.817757 | -2.629178 | H  | -5.104950 | -3.864404 | 2.959404  |
| C               | -0.071973 | 3.106962  | 0.971538  |    |           |           |           |

|              |           |           |           |    |           |           |           |
|--------------|-----------|-----------|-----------|----|-----------|-----------|-----------|
| C            | -4.371424 | -1.892517 | 2.436247  | C  | -0.038019 | 3.662914  | -1.824411 |
| H            | -5.371175 | -1.442411 | 2.419201  | H  | 0.077686  | 4.143788  | -2.807220 |
| C            | -3.269869 | -1.083152 | 2.160983  | H  | 0.943068  | 3.665893  | -1.329426 |
| C            | -3.424678 | 0.395319  | 1.936083  | C  | -0.571210 | 2.253235  | -2.002401 |
| H            | -2.467852 | 0.866586  | 2.231224  | C  | 1.001383  | 1.590758  | 0.422122  |
| H            | -4.196736 | 0.792353  | 2.612891  | C  | 1.361870  | 2.696602  | 1.210467  |
| C            | -3.736551 | 0.872642  | 0.544014  | H  | 0.642699  | 3.498803  | 1.367874  |
| C            | -4.791891 | 1.770995  | 0.339196  | C  | 2.623994  | 2.783296  | 1.791992  |
| H            | -5.425576 | 2.036720  | 1.191416  | C  | 2.133700  | 4.851337  | 2.819241  |
| C            | -5.036566 | 2.344083  | -0.908593 | H  | 1.829220  | 5.369145  | 1.894751  |
| H            | -5.873316 | 3.036440  | -1.032588 | H  | 2.657071  | 5.564496  | 3.464705  |
| C            | -4.214864 | 2.035304  | -1.991694 | H  | 1.231072  | 4.497059  | 3.342314  |
| H            | -4.390909 | 2.485186  | -2.971770 | C  | 3.570242  | 1.743148  | 1.580914  |
| C            | -3.165158 | 1.139855  | -1.813679 | C  | 5.732322  | 0.898924  | 1.995586  |
| H            | -2.528824 | 0.872530  | -2.662632 | H  | 5.404626  | -0.072127 | 2.400457  |
| C            | -2.916541 | 0.555129  | -0.563663 | H  | 6.625267  | 1.223404  | 2.540017  |
| C            | -2.353898 | -1.180980 | -0.878577 | H  | 5.994309  | 0.771634  | 0.932047  |
| O            | -3.057474 | -2.008177 | -1.310110 | C  | 3.215445  | 0.648366  | 0.798550  |
| H            | 1.705157  | 5.537410  | -0.361639 | H  | 3.918993  | -0.172732 | 0.659192  |
| H            | -0.065058 | 2.819394  | 2.033260  | C  | 1.937068  | 0.561192  | 0.220870  |
| H            | -2.162238 | 4.754998  | -1.214839 | C  | 4.102043  | -2.211284 | -1.620538 |
| H            | 0.472510  | 2.006139  | -2.522114 | C  | 2.229796  | -3.366926 | -2.354654 |
| H            | 3.177593  | -4.563449 | -1.735363 | C  | 1.751568  | -3.560821 | -0.922774 |
| H            | -0.802905 | -4.664521 | -2.399995 | H  | 0.657801  | -3.646049 | -0.858752 |
| H            | 0.952017  | -1.097628 | -3.031819 | H  | 2.183944  | -4.494834 | -0.534971 |
| H            | 0.900723  | -3.003366 | 1.215291  | C  | 2.249236  | -2.382945 | -0.106002 |
|              |           |           |           | C  | 2.134603  | -0.969963 | -2.402247 |
|              |           |           |           | C  | 3.649405  | -0.944649 | -2.328063 |
| <b>6(L6)</b> |           |           |           | H  | 4.011882  | -0.047823 | -1.804865 |
| P            | -0.634144 | 1.331396  | -0.355893 | H  | 4.073659  | -0.935754 | -3.343108 |
| P            | 1.338455  | -0.873716 | -0.710238 | Ni | -0.906620 | -0.905679 | -0.555960 |
| O            | -2.273808 | 4.454162  | -1.733229 | O  | -0.260445 | -1.704687 | 1.248801  |
| O            | -1.221169 | 3.939432  | 0.288708  | C  | -0.968125 | -2.426043 | 2.074422  |
| O            | -1.890673 | 2.291469  | -2.536779 | C  | -0.563523 | -3.725844 | 2.469603  |
| O            | 3.037475  | 3.801830  | 2.561636  | H  | 0.350476  | -4.139754 | 2.031399  |
| O            | 4.760412  | 1.901384  | 2.179911  | C  | -1.295268 | -4.460906 | 3.397243  |
| O            | 3.663559  | -2.244116 | -0.274781 | H  | -0.951503 | -5.459567 | 3.685086  |
| O            | 3.642599  | -3.326543 | -2.347081 | C  | -2.461525 | -3.938309 | 3.961046  |
| O            | 1.690274  | -2.205238 | -2.964359 | H  | -3.035923 | -4.515623 | 4.689522  |
| C            | -1.795776 | 2.630257  | 0.359865  | C  | -2.878852 | -2.660273 | 3.581706  |
| C            | -3.088548 | 2.628011  | -0.438360 | H  | -3.789172 | -2.234468 | 4.020108  |
| H            | -3.802211 | 3.318391  | 0.034191  | C  | -2.154707 | -1.901414 | 2.664441  |
| H            | -3.550853 | 1.636160  | -0.478742 | C  | -2.582481 | -0.532563 | 2.227506  |
| C            | -2.783363 | 3.138389  | -1.835149 | H  | -1.673047 | 0.071120  | 2.057508  |
| C            | -1.059864 | 4.451230  | -1.023447 |    |           |           |           |

|               |           |           |           |    |           |           |           |
|---------------|-----------|-----------|-----------|----|-----------|-----------|-----------|
| H             | -3.164527 | -0.043134 | 3.023197  | C  | 0.773619  | 2.766204  | 1.368433  |
| C             | -3.408526 | -0.563324 | 0.964239  | H  | -0.082767 | 3.411777  | 1.559190  |
| C             | -4.798885 | -0.397703 | 1.078623  | C  | 1.984912  | 3.019258  | 2.008479  |
| H             | -5.225811 | -0.254184 | 2.077386  | C  | 1.093987  | 4.826016  | 3.234097  |
| C             | -5.635883 | -0.396022 | -0.034066 | H  | 0.700530  | 5.376844  | 2.364512  |
| H             | -6.713556 | -0.261149 | 0.088875  | H  | 1.459903  | 5.548445  | 3.971012  |
| C             | -5.080349 | -0.559221 | -1.300621 | H  | 0.275843  | 4.241847  | 3.684677  |
| H             | -5.714024 | -0.553498 | -2.191792 | C  | 3.111400  | 2.191999  | 1.741805  |
| C             | -3.701238 | -0.730723 | -1.431429 | C  | 5.384253  | 1.727159  | 2.163174  |
| H             | -3.290708 | -0.824810 | -2.440837 | H  | 5.232642  | 0.677730  | 2.462243  |
| C             | -2.849674 | -0.749373 | -0.316619 | H  | 6.186525  | 2.154503  | 2.773675  |
| C             | -1.178388 | -2.052105 | -1.892924 | H  | 5.691610  | 1.755889  | 1.104756  |
| O             | -1.424479 | -2.818756 | -2.716843 | C  | 2.981035  | 1.122894  | 0.861560  |
| H             | -1.965529 | 2.429975  | 1.428392  | H  | 3.824582  | 0.455647  | 0.685071  |
| H             | -0.767409 | 5.502028  | -0.889867 | C  | 1.750488  | 0.853876  | 0.238493  |
| H             | -3.683386 | 3.196332  | -2.461363 | C  | 4.396088  | -1.362921 | -1.690227 |
| H             | 0.029132  | 1.673299  | -2.718753 | C  | 2.781141  | -2.728702 | -2.634749 |
| H             | 2.061000  | -2.493332 | 0.968500  | C  | 2.266758  | -3.133181 | -1.263387 |
| H             | 1.740176  | -0.180159 | -3.058457 | H  | 1.193166  | -3.365154 | -1.284451 |
| H             | 5.196457  | -2.295292 | -1.574574 | H  | 2.807698  | -4.033223 | -0.936325 |
| H             | 1.939024  | -4.198394 | -3.010223 | C  | 2.542624  | -1.988904 | -0.301575 |
|               |           |           |           | C  | 2.276973  | -0.395134 | -2.467730 |
|               |           |           |           | C  | 3.761616  | -0.125340 | -2.305142 |
|               |           |           |           | H  | 3.947709  | 0.765633  | -1.688515 |
|               |           |           |           | H  | 4.216703  | 0.049076  | -3.291485 |
|               |           |           |           | Ni | -0.802963 | -1.038350 | -0.699682 |
|               |           |           |           | O  | -0.149416 | -2.412311 | 0.632325  |
|               |           |           |           | C  | -2.675979 | -1.286541 | -0.234925 |
|               |           |           |           | C  | -3.675776 | -1.551215 | -1.180042 |
|               |           |           |           | H  | -3.433428 | -1.622054 | -2.243798 |
|               |           |           |           | C  | -5.011049 | -1.704040 | -0.801332 |
|               |           |           |           | H  | -5.769600 | -1.906904 | -1.562556 |
|               |           |           |           | C  | -5.366711 | -1.592299 | 0.540411  |
|               |           |           |           | H  | -6.408742 | -1.704845 | 0.850451  |
|               |           |           |           | C  | -4.378119 | -1.337329 | 1.487247  |
|               |           |           |           | H  | -4.647813 | -1.258969 | 2.546407  |
|               |           |           |           | C  | -3.031285 | -1.177815 | 1.124705  |
|               |           |           |           | C  | -2.015849 | -0.943224 | 2.218758  |
|               |           |           |           | H  | -1.222838 | -0.265246 | 1.855928  |
|               |           |           |           | H  | -2.502300 | -0.443078 | 3.070186  |
|               |           |           |           | C  | -1.382839 | -2.220923 | 2.683014  |
|               |           |           |           | C  | -1.675802 | -2.773535 | 3.929803  |
|               |           |           |           | H  | -2.365518 | -2.234977 | 4.590442  |
|               |           |           |           | C  | -1.110397 | -3.977237 | 4.355178  |
| <b>10(L6)</b> |           |           |           |    |           |           |           |
| P             | -0.903698 | 1.168452  | -0.348334 |    |           |           |           |
| P             | 1.418378  | -0.589971 | -0.808461 |    |           |           |           |
| O             | -3.059410 | 3.950303  | -1.714018 |    |           |           |           |
| O             | -1.965168 | 3.609283  | 0.323462  |    |           |           |           |
| O             | -2.257774 | 1.915533  | -2.542006 |    |           |           |           |
| O             | 2.189459  | 4.009717  | 2.889141  |    |           |           |           |
| O             | 4.237510  | 2.512054  | 2.396781  |    |           |           |           |
| O             | 3.919148  | -1.605121 | -0.379208 |    |           |           |           |
| O             | 4.164563  | -2.459102 | -2.539922 |    |           |           |           |
| O             | 2.078492  | -1.618685 | -3.170587 |    |           |           |           |
| C             | -2.290590 | 2.215801  | 0.362535  |    |           |           |           |
| C             | -3.542354 | 1.980631  | -0.467080 |    |           |           |           |
| H             | -4.387316 | 2.510132  | -0.003407 |    |           |           |           |
| H             | -3.799396 | 0.917137  | -0.530293 |    |           |           |           |
| C             | -3.308646 | 2.566019  | -1.849473 |    |           |           |           |
| C             | -1.879873 | 4.165049  | -0.977754 |    |           |           |           |
| C             | -0.710766 | 3.599006  | -1.765144 |    |           |           |           |
| H             | -0.663979 | 4.111436  | -2.737697 |    |           |           |           |
| H             | 0.241121  | 3.774275  | -1.243975 |    |           |           |           |
| C             | -0.966504 | 2.117833  | -1.974360 |    |           |           |           |
| C             | 0.641721  | 1.683453  | 0.483186  |    |           |           |           |

|                  |           |           |           |    |           |           |           |
|------------------|-----------|-----------|-----------|----|-----------|-----------|-----------|
| H                | -1.348084 | -4.386170 | 5.339924  | H  | -1.270584 | 6.279981  | 2.719637  |
| C                | -0.237539 | -4.644219 | 3.492426  | H  | -1.839662 | 4.588315  | 2.746630  |
| H                | 0.216322  | -5.591788 | 3.799595  | C  | 1.714531  | 3.474103  | 1.226091  |
| C                | 0.061636  | -4.120656 | 2.239982  | C  | 3.957469  | 4.032068  | 1.690253  |
| H                | 0.739456  | -4.649156 | 1.562407  | H  | 4.201790  | 3.080735  | 2.190258  |
| C                | -0.491355 | -2.890967 | 1.793967  | H  | 4.492315  | 4.842691  | 2.196714  |
| C                | -0.966590 | -1.483572 | -2.456178 | H  | 4.302348  | 3.981125  | 0.644156  |
| O                | -1.092044 | -1.522658 | -3.600481 | C  | 2.069976  | 2.305472  | 0.558284  |
| H                | -1.795718 | 5.249532  | -0.823795 | H  | 3.121949  | 2.034516  | 0.462632  |
| H                | -4.189208 | 2.465817  | -2.497006 | C  | 1.090705  | 1.448842  | 0.026557  |
| H                | -2.442841 | 1.968775  | 1.424201  | C  | 4.416250  | 0.476884  | -1.822701 |
| H                | -0.249623 | 1.673872  | -2.682961 | C  | 3.612988  | -1.588462 | -2.497980 |
| H                | 1.777859  | 0.385177  | -3.062950 | C  | 3.377787  | -2.003872 | -1.052859 |
| H                | 2.665834  | -3.528987 | -3.377492 | H  | 2.531451  | -2.703485 | -0.988638 |
| H                | 5.485997  | -1.265976 | -1.591391 | H  | 4.278064  | -2.513833 | -0.678752 |
| H                | 2.344191  | -2.257210 | 0.743631  | C  | 3.111806  | -0.746531 | -0.235857 |
|                  |           |           |           | C  | 2.067660  | 0.224851  | -2.514284 |
|                  |           |           |           | C  | 3.246627  | 1.180343  | -2.495236 |
| <b>11-ts(L6)</b> |           |           |           | H  | 2.997927  | 2.116908  | -1.976308 |
| P                | -1.457391 | 0.517036  | -0.423075 | H  | 3.537932  | 1.433711  | -3.525737 |
| P                | 1.422502  | -0.150230 | -0.781724 | Ni | -0.448771 | -1.424269 | -0.622123 |
| O                | -4.842990 | 1.677760  | -1.621807 | O  | 0.139614  | -2.980121 | 0.513451  |
| O                | -3.564985 | 2.193071  | 0.262263  | C  | -1.598225 | -2.476612 | 0.691984  |
| O                | -3.185541 | 0.260937  | -2.459863 | C  | -2.479438 | -3.443294 | 0.180538  |
| O                | 0.078565  | 4.958134  | 2.010919  | H  | -2.264285 | -3.926366 | -0.775881 |
| O                | 2.585885  | 4.335890  | 1.777826  | C  | -3.645615 | -3.741136 | 0.881012  |
| O                | 4.158735  | 0.202554  | -0.459087 | H  | -4.353071 | -4.457757 | 0.454187  |
| O                | 4.711188  | -0.698962 | -2.538947 | C  | -3.911980 | -3.139307 | 2.114140  |
| O                | 2.465664  | -1.017935 | -3.090962 | H  | -4.825693 | -3.377498 | 2.662831  |
| C                | -3.101883 | 0.846319  | 0.418230  | C  | -2.970325 | -2.262480 | 2.660030  |
| C                | -4.098869 | -0.106821 | -0.224876 | H  | -3.139766 | -1.823730 | 3.649307  |
| H                | -5.052589 | -0.077811 | 0.322403  | C  | -1.790918 | -1.945002 | 1.984671  |
| H                | -3.730680 | -1.142310 | -0.210809 | C  | -0.707515 | -1.100613 | 2.588192  |
| C                | -4.342361 | 0.353578  | -1.653983 | H  | -0.599243 | -0.148662 | 2.027729  |
| C                | -3.884710 | 2.548322  | -1.070412 | H  | -0.978551 | -0.808126 | 3.613860  |
| C                | -2.660082 | 2.560287  | -1.970531 | C  | 0.602290  | -1.842367 | 2.611891  |
| H                | -2.964920 | 2.915302  | -2.966722 | C  | 1.520785  | -1.677132 | 3.654969  |
| H                | -1.895360 | 3.250925  | -1.587467 | H  | 1.287027  | -0.953286 | 4.442454  |
| C                | -2.132227 | 1.141035  | -2.068903 | C  | 2.703786  | -2.410572 | 3.721900  |
| C                | -0.271690 | 1.776668  | 0.170137  | H  | 3.404448  | -2.252066 | 4.544567  |
| C                | -0.629886 | 2.966542  | 0.828426  | C  | 2.965879  | -3.370220 | 2.740936  |
| H                | -1.685425 | 3.215322  | 0.939735  | H  | 3.873729  | -3.977461 | 2.790632  |
| C                | 0.340283  | 3.813338  | 1.357166  | C  | 2.070121  | -3.561861 | 1.696691  |
| C                | -1.269056 | 5.333342  | 2.168789  | H  | 2.252773  | -4.310141 | 0.922032  |
| H                | -1.770483 | 5.487444  | 1.198712  |    |           |           |           |

|               |           |           |           |              |           |           |           |
|---------------|-----------|-----------|-----------|--------------|-----------|-----------|-----------|
| C             | 0.907704  | -2.775134 | 1.593109  | H            | -2.957718 | 5.687870  | -0.568332 |
| C             | -0.781621 | -2.009716 | -2.314217 | H            | -3.082725 | 4.226119  | 0.449015  |
| O             | -0.990518 | -2.102075 | -3.446768 | C            | -1.386094 | 2.157093  | -0.319274 |
| H             | 5.330059  | 1.087644  | -1.831047 | H            | -2.476143 | 2.155355  | -0.326777 |
| H             | 1.241307  | 0.599328  | -3.137363 | C            | -0.701898 | 0.933491  | -0.209903 |
| H             | 3.878413  | -2.442420 | -3.135161 | C            | -4.348622 | 0.275673  | 1.088413  |
| H             | 3.109134  | -0.945897 | 0.846198  | C            | -4.198755 | -2.021554 | 0.822158  |
| H             | -3.014214 | 0.679780  | 1.502832  | C            | -3.916307 | -1.857275 | -0.664567 |
| H             | -4.359661 | 3.537174  | -1.001168 | H            | -3.279779 | -2.675404 | -1.030861 |
| H             | -1.351884 | 1.044245  | -2.839391 | H            | -4.871241 | -1.887328 | -1.209516 |
| H             | -5.102083 | -0.256043 | -2.160763 | C            | -3.232285 | -0.512627 | -0.869156 |
|               |           |           |           | C            | -2.243313 | -0.896770 | 1.591772  |
|               |           |           |           | C            | -3.121258 | 0.276216  | 1.985259  |
| <b>12(L6)</b> |           |           |           | H            | -2.579024 | 1.229680  | 1.911687  |
| P             | 1.508898  | -0.719963 | -0.143087 | H            | -3.453522 | 0.160210  | 3.028425  |
| P             | -1.509851 | -0.711957 | -0.143727 | Ni           | -0.003057 | -2.052336 | -0.890349 |
| O             | 5.007218  | -0.964658 | 1.280785  | C            | -0.002057 | -3.084793 | -2.288864 |
| O             | 4.028063  | 0.498622  | -0.248769 | O            | 0.000414  | -3.706600 | -3.275027 |
| O             | 2.996280  | -2.098551 | 1.621423  | H            | -4.751826 | -2.945748 | 1.038155  |
| O             | 1.309839  | 4.557113  | -0.590799 | H            | -5.065174 | 1.062438  | 1.363778  |
| O             | -1.281041 | 4.568346  | -0.547134 | H            | -3.155741 | -0.247420 | -1.933972 |
| O             | -4.022613 | 0.518223  | -0.263573 | H            | 3.173517  | -0.276292 | -1.921279 |
| O             | -5.022835 | -0.952996 | 1.244870  | H            | 1.403878  | -1.047816 | 2.315631  |
| O             | -3.019241 | -2.097689 | 1.595451  | H            | 5.056858  | 1.051448  | 1.384534  |
| C             | 3.238382  | -0.533252 | -0.853637 | H            | 4.730304  | -2.957744 | 1.086637  |
| C             | 3.914664  | -1.879241 | -0.632072 | H            | -1.429809 | -1.058844 | 2.313727  |
| H             | 4.874557  | -1.917819 | -1.167787 |              |           |           |           |
| H             | 3.277960  | -2.697498 | -0.997825 | <b>2(L7)</b> |           |           |           |
| C             | 4.182746  | -2.033124 | 0.858504  | P            | 1.798625  | 0.778737  | 1.370153  |
| C             | 4.339789  | 0.265490  | 1.108299  | P            | 3.245029  | -1.016066 | -0.679106 |
| C             | 3.103614  | 0.278446  | 1.992855  | C            | 3.568528  | 0.346399  | 1.722774  |
| H             | 3.424800  | 0.170495  | 3.040325  | H            | 4.070995  | 1.136301  | 2.305705  |
| H             | 2.566153  | 1.233381  | 1.905090  | H            | 3.548222  | -0.547572 | 2.369135  |
| C             | 2.225082  | -0.894552 | 1.600527  | C            | 1.861595  | 2.590881  | 1.106930  |
| C             | 0.709838  | 0.928710  | -0.221210 | C            | 3.682494  | -2.707938 | -0.129543 |
| C             | 1.401405  | 2.146087  | -0.350009 | C            | 4.128621  | -0.913926 | -2.276440 |
| H             | 2.491183  | 2.135211  | -0.375519 | C            | 1.014018  | 0.668178  | 3.014708  |
| C             | 0.721259  | 3.354976  | -0.461009 | C            | 4.298209  | 0.048024  | 0.421837  |
| C             | 2.715483  | 4.602460  | -0.630930 | H            | 5.284241  | -0.413570 | 0.597903  |
| H             | 3.168239  | 4.217167  | 0.298189  | H            | 4.490932  | 0.981761  | -0.133784 |
| H             | 2.993309  | 5.656047  | -0.743711 | Ni           | 1.187433  | -0.408581 | -0.274547 |
| H             | 3.124028  | 4.036068  | -1.483484 | O            | -1.366292 | -1.109190 | 0.599266  |
| C             | -0.698721 | 3.360847  | -0.440252 | C            | -2.689530 | -1.395194 | 0.395138  |
| C             | -2.685582 | 4.629067  | -0.497972 | C            | -3.098372 | -2.665325 | -0.005585 |
| H             | -3.155065 | 4.087941  | -1.335545 |              |           |           |           |



|                 |           |           |           |    |           |           |           |
|-----------------|-----------|-----------|-----------|----|-----------|-----------|-----------|
| H               | -2.340937 | -3.429030 | -0.193731 | C  | -3.989845 | 1.849375  | -1.477931 |
| C               | -4.460017 | -2.928447 | -0.157530 | C  | -0.720468 | -2.280557 | 2.148021  |
| H               | -4.788156 | -3.922318 | -0.472750 | C  | -4.011080 | -0.197329 | 0.512503  |
| C               | -5.398773 | -1.926236 | 0.085308  | H  | -4.902513 | 0.232805  | 0.999815  |
| H               | -6.464923 | -2.132788 | -0.035825 | H  | -4.380619 | -0.772138 | -0.353848 |
| C               | -4.977253 | -0.656430 | 0.486000  | Ni | -0.993827 | 0.146482  | -0.469653 |
| H               | -5.713494 | 0.130300  | 0.676731  | O  | 0.769150  | 1.167246  | -1.082185 |
| C               | -3.619791 | -0.376397 | 0.647688  | C  | 1.712439  | 1.834664  | -0.366273 |
| C               | -3.069352 | 0.955727  | 1.065011  | C  | 2.137944  | 3.069008  | -0.874973 |
| H               | -2.429350 | 0.802283  | 1.952932  | H  | 1.718613  | 3.409839  | -1.824099 |
| H               | -3.884439 | 1.621344  | 1.382542  | C  | 3.070274  | 3.833311  | -0.180193 |
| C               | -2.273245 | 1.631847  | -0.026721 | H  | 3.393489  | 4.794167  | -0.589011 |
| C               | -2.588753 | 2.954313  | -0.367358 | C  | 3.593471  | 3.372183  | 1.028995  |
| H               | -3.383061 | 3.459882  | 0.190879  | H  | 4.325992  | 3.967531  | 1.578809  |
| C               | -1.939060 | 3.629859  | -1.397163 | C  | 3.174166  | 2.141469  | 1.528848  |
| H               | -2.211779 | 4.660877  | -1.635425 | H  | 3.577414  | 1.769056  | 2.475843  |
| C               | -0.955961 | 2.964978  | -2.131234 | C  | 2.233884  | 1.360617  | 0.851793  |
| H               | -0.447658 | 3.468300  | -2.957922 | C  | 1.780423  | 0.029398  | 1.361129  |
| C               | -0.627788 | 1.655036  | -1.810558 | H  | 0.668058  | 0.019483  | 1.346585  |
| H               | 0.140095  | 1.121919  | -2.377878 | H  | 2.115330  | -0.122495 | 2.396895  |
| C               | -1.254223 | 0.967779  | -0.752093 | C  | 2.261946  | -1.083772 | 0.478966  |
| C               | -0.718475 | -0.385915 | -0.445858 | C  | 3.243492  | -1.981891 | 0.903547  |
| O               | -0.175785 | -1.095242 | -1.386052 | H  | 3.668281  | -1.867498 | 1.905527  |
| H               | 3.160193  | -3.446514 | -0.753771 | C  | 3.676071  | -3.020650 | 0.079438  |
| H               | 3.346670  | -2.868671 | 0.904391  | H  | 4.441321  | -3.715173 | 0.434947  |
| H               | 4.764793  | -2.902007 | -0.183711 | C  | 3.125563  | -3.172380 | -1.193647 |
| H               | 3.691171  | -1.627415 | -2.988581 | H  | 3.459233  | -3.984462 | -1.844544 |
| H               | 4.014324  | 0.089391  | -2.709520 | C  | 2.150927  | -2.283449 | -1.635186 |
| H               | 5.202576  | -1.133606 | -2.175967 | H  | 1.701270  | -2.384667 | -2.626003 |
| H               | 2.379150  | 2.822668  | 0.165258  | C  | 1.718004  | -1.230595 | -0.815422 |
| H               | 0.841895  | 2.992336  | 1.018017  | C  | 0.608914  | -0.392580 | -1.304657 |
| H               | 2.370945  | 3.116089  | 1.929576  | O  | -0.034227 | -0.558452 | -2.355155 |
| H               | -0.005151 | 1.076298  | 2.961353  | H  | -0.989318 | -3.398980 | -0.700543 |
| H               | 1.570968  | 1.219670  | 3.787813  | H  | -2.440915 | -3.791929 | 0.264035  |
| H               | 0.928209  | -0.383558 | 3.320647  | H  | -2.550387 | -2.719137 | -1.164939 |
|                 |           |           |           | H  | -1.297673 | -3.116997 | 2.572685  |
|                 |           |           |           | H  | 0.261890  | -2.667841 | 1.837933  |
|                 |           |           |           | H  | -0.553176 | -1.538473 | 2.941365  |
|                 |           |           |           | H  | -2.508259 | 2.082227  | 2.031596  |
|                 |           |           |           | H  | -2.474037 | 3.330201  | 0.781706  |
|                 |           |           |           | H  | -4.044981 | 2.708070  | 1.362828  |
|                 |           |           |           | H  | -4.989635 | 2.114172  | -1.100252 |
|                 |           |           |           | H  | -4.102745 | 1.134841  | -2.304657 |
|                 |           |           |           | H  | -3.523711 | 2.754541  | -1.891475 |
| <b>3-ts(L7)</b> |           |           |           |    |           |           |           |
| P               | -1.574664 | -1.514807 | 0.719064  |    |           |           |           |
| P               | -2.917944 | 1.135282  | -0.177897 |    |           |           |           |
| C               | -3.229144 | -1.100648 | 1.452454  |    |           |           |           |
| H               | -3.791364 | -2.014466 | 1.709191  |    |           |           |           |
| H               | -3.029388 | -0.584837 | 2.407359  |    |           |           |           |
| C               | -1.930921 | -2.995607 | -0.300359 |    |           |           |           |
| C               | -3.008603 | 2.429964  | 1.116905  |    |           |           |           |

|              |           |           |           |                 |           |           |           |
|--------------|-----------|-----------|-----------|-----------------|-----------|-----------|-----------|
|              |           |           |           | H               | -2.649517 | -2.686147 | -1.721530 |
|              |           |           |           | H               | -3.779790 | -1.331391 | -1.579290 |
| <b>4(L7)</b> |           |           |           | H               | -4.081384 | -2.832789 | -0.649261 |
| P            | -2.268332 | -1.473007 | 0.313440  | H               | -1.247785 | 1.957642  | 2.400657  |
| P            | -2.069105 | 1.578090  | 0.132217  | H               | -0.562935 | 3.119308  | 1.248292  |
| C            | -3.427898 | -0.492801 | 1.364749  | H               | -2.233890 | 3.336746  | 1.840143  |
| H            | -4.366081 | -1.044006 | 1.541196  | H               | -1.646039 | 3.374191  | -1.420576 |
| H            | -2.942235 | -0.382994 | 2.349402  | H               | -3.262259 | 3.565774  | -0.685299 |
| C            | -3.303746 | -2.148806 | -1.020668 | H               | -2.984327 | 2.357537  | -1.976529 |
| C            | -1.484497 | 2.591105  | 1.534352  |                 |           |           |           |
| C            | -2.545625 | 2.836174  | -1.090693 |                 |           |           |           |
| C            | -1.857476 | -2.933667 | 1.314662  | <b>5-ts(L7)</b> |           |           |           |
| C            | -3.672418 | 0.867715  | 0.726802  | P               | -1.912333 | 0.957161  | -1.138624 |
| H            | -4.191632 | 1.556906  | 1.412066  | P               | -2.038907 | -1.456003 | 0.807072  |
| H            | -4.324992 | 0.765150  | -0.156322 | C               | -3.367384 | -0.177422 | -1.252811 |
| Ni           | -0.760079 | -0.181701 | -0.455775 | H               | -4.257508 | 0.345036  | -1.639502 |
| O            | 0.541839  | 0.867560  | -1.408641 | H               | -3.102808 | -0.941216 | -2.003520 |
| C            | 1.358370  | 1.682006  | -0.799748 | C               | -2.614161 | 2.568275  | -0.657427 |
| C            | 1.790398  | 2.867393  | -1.449120 | C               | -1.849645 | -3.114459 | 0.088123  |
| H            | 1.419439  | 3.049412  | -2.461911 | C               | -2.426623 | -1.785257 | 2.552093  |
| C            | 2.653526  | 3.765040  | -0.833703 | C               | -1.406682 | 1.201170  | -2.865795 |
| H            | 2.961653  | 4.667415  | -1.370968 | C               | -3.626844 | -0.826191 | 0.097716  |
| C            | 3.123899  | 3.527443  | 0.460759  | H               | -4.374120 | -1.634459 | 0.034234  |
| H            | 3.798040  | 4.233328  | 0.951277  | H               | -4.026209 | -0.088224 | 0.813960  |
| C            | 2.719826  | 2.362608  | 1.114392  | Ni              | -0.452073 | -0.071532 | 0.228510  |
| H            | 3.087368  | 2.156605  | 2.126491  | O               | 0.342416  | -1.166643 | -1.372779 |
| C            | 1.853933  | 1.440545  | 0.519873  | C               | 1.545282  | -1.528276 | -1.016931 |
| C            | 1.467369  | 0.175269  | 1.238066  | C               | 1.885654  | -2.879980 | -0.747333 |
| H            | 0.364028  | 0.031930  | 1.213237  | H               | 1.113267  | -3.641576 | -0.892272 |
| H            | 1.729248  | 0.279428  | 2.302720  | C               | 3.151795  | -3.237608 | -0.293467 |
| C            | 2.154359  | -1.058471 | 0.699860  | H               | 3.367763  | -4.289655 | -0.079013 |
| C            | 3.421795  | -1.366843 | 1.214981  | C               | 4.145919  | -2.274033 | -0.107298 |
| H            | 3.843945  | -0.717131 | 1.987967  | H               | 5.138823  | -2.556005 | 0.250993  |
| C            | 4.148768  | -2.465107 | 0.770393  | C               | 3.848879  | -0.941937 | -0.407618 |
| H            | 5.132009  | -2.676459 | 1.198646  | H               | 4.624363  | -0.175234 | -0.293479 |
| C            | 3.618060  | -3.293272 | -0.220874 | C               | 2.588381  | -0.557677 | -0.861665 |
| H            | 4.181965  | -4.157682 | -0.580527 | C               | 2.288779  | 0.863399  | -1.251160 |
| C            | 2.368818  | -3.001657 | -0.747881 | H               | 1.505616  | 0.821276  | -2.030902 |
| H            | 1.927527  | -3.623420 | -1.531152 | H               | 3.174843  | 1.319129  | -1.719452 |
| C            | 1.623062  | -1.893648 | -0.307354 | C               | 1.791756  | 1.804465  | -0.184385 |
| C            | 0.279207  | -1.688428 | -0.949469 | C               | 2.279976  | 3.119291  | -0.148837 |
| O            | -0.078986 | -2.415965 | -1.860712 | H               | 3.062457  | 3.405751  | -0.858832 |
| H            | -1.183506 | -2.657144 | 2.137508  | C               | 1.792717  | 4.063618  | 0.752762  |
| H            | -1.331525 | -3.665957 | 0.686121  | H               | 2.205841  | 5.075678  | 0.754841  |
| H            | -2.754748 | -3.413214 | 1.733054  | C               | 0.788019  | 3.712891  | 1.654069  |

|              |           |           |           |               |           |           |           |
|--------------|-----------|-----------|-----------|---------------|-----------|-----------|-----------|
| H            | 0.403161  | 4.442511  | 2.370866  | H             | 1.665658  | 0.436006  | -2.117914 |
| C            | 0.290475  | 2.414019  | 1.639329  | H             | 3.389969  | 0.639099  | -1.786640 |
| H            | -0.478848 | 2.119839  | 2.361066  | C             | 2.111553  | 1.419874  | -0.278236 |
| C            | 0.770057  | 1.458388  | 0.728500  | C             | 3.037749  | 2.458892  | -0.084899 |
| C            | 0.662313  | -0.196950 | 1.537512  | H             | 3.956906  | 2.451025  | -0.680704 |
| O            | 1.317604  | -0.508339 | 2.456817  | C             | 2.824682  | 3.486654  | 0.830998  |
| H            | -1.809039 | 3.316641  | -0.617359 | H             | 3.572049  | 4.274554  | 0.954761  |
| H            | -3.057064 | 2.509748  | 0.346821  | C             | 1.654933  | 3.492281  | 1.585450  |
| H            | -3.380548 | 2.919408  | -1.364309 | H             | 1.466538  | 4.282756  | 2.317294  |
| H            | -2.256340 | 1.444343  | -3.521024 | C             | 0.724492  | 2.466209  | 1.408551  |
| H            | -0.676108 | 2.019924  | -2.925904 | H             | -0.188068 | 2.476488  | 2.015859  |
| H            | -0.915152 | 0.283748  | -3.216805 | C             | 0.926764  | 1.428329  | 0.486805  |
| H            | -1.558229 | -2.249294 | 3.040502  | C             | 0.023365  | -0.395695 | 2.032517  |
| H            | -3.289929 | -2.458078 | 2.664185  | O             | 0.337291  | -0.643648 | 3.115091  |
| H            | -2.639611 | -0.846031 | 3.080705  | H             | -1.680590 | -3.456403 | 0.404036  |
| H            | -2.756114 | -3.725648 | 0.211534  | H             | -1.808362 | -2.757745 | -1.218205 |
| H            | -1.009322 | -3.624274 | 0.578928  | H             | -3.299032 | -3.270417 | -0.330177 |
| H            | -1.594647 | -3.022327 | -0.975840 | H             | -2.609660 | -2.059562 | 2.712408  |
|              |           |           |           | H             | -4.416081 | -0.970711 | -0.903171 |
| <b>6(L7)</b> |           |           |           | H             | -3.352309 | -0.453166 | 2.593895  |
| P            | -1.505732 | 1.389607  | -1.031850 | H             | -4.207228 | -1.881186 | 1.944523  |
| P            | -2.388604 | -1.156149 | 0.474992  | H             | 0.249303  | 2.523785  | -2.258367 |
| C            | -2.951372 | 0.451529  | -1.690422 | H             | -0.248633 | 0.999515  | -3.040499 |
| H            | -3.636333 | 1.110739  | -2.247774 | H             | -1.265743 | 2.464907  | -3.201979 |
| H            | -2.539261 | -0.270442 | -2.415011 | H             | -1.403860 | 3.614730  | -0.089554 |
| C            | -2.215076 | 2.941796  | -0.400496 | H             | -2.845234 | 2.754010  | 0.479725  |
| C            | -2.300657 | -2.818163 | -0.239684 | H             | -2.816763 | 3.454324  | -1.165749 |
| C            | -3.221268 | -1.410163 | 2.070790  |               |           |           |           |
| C            | -0.612959 | 1.896508  | -2.523346 | <b>10(L7)</b> |           |           |           |
| C            | -3.644903 | -0.267830 | -0.549539 | P             | -1.943849 | 0.830058  | -0.953328 |
| H            | -4.157364 | 0.449547  | 0.112866  | P             | -1.573861 | -2.043089 | -0.069209 |
| Ni           | -0.476177 | 0.037400  | 0.406129  | C             | -2.892011 | -0.475160 | -1.870506 |
| O            | 0.119794  | -1.199292 | -1.191694 | H             | -3.827708 | -0.057450 | -2.276608 |
| C            | 1.242272  | -1.784004 | -0.860667 | H             | -2.274772 | -0.753940 | -2.741036 |
| C            | 1.313640  | -3.156445 | -0.506030 | C             | -3.243112 | 1.836160  | -0.168359 |
| H            | 0.393386  | -3.746668 | -0.535594 | C             | -0.534175 | -2.956523 | -1.241646 |
| C            | 2.515156  | -3.755253 | -0.135971 | C             | -1.981068 | -3.269743 | 1.199500  |
| H            | 2.526063  | -4.816064 | 0.135248  | C             | -1.358821 | 1.923972  | -2.281957 |
| C            | 3.700999  | -3.018872 | -0.109664 | C             | -3.134973 | -1.679401 | -0.975970 |
| H            | 4.644439  | -3.486130 | 0.182563  | H             | -3.495301 | -2.553615 | -1.541651 |
| C            | 3.659664  | -1.671975 | -0.482380 | H             | -3.904123 | -1.457815 | -0.217077 |
| H            | 4.585191  | -1.083960 | -0.491120 | Ni            | -0.646790 | -0.091064 | 0.527541  |
| C            | 2.469697  | -1.052361 | -0.859894 | O             | 1.000076  | -1.225432 | 0.802461  |
| C            | 2.427328  | 0.374592  | -1.323320 | C             | 2.229752  | -1.221568 | 0.380721  |

|                  |           |           |           |    |           |           |           |
|------------------|-----------|-----------|-----------|----|-----------|-----------|-----------|
| C                | 3.175792  | -2.100893 | 0.973895  | C  | 0.703349  | -2.896946 | -1.053567 |
| H                | 2.826048  | -2.738275 | 1.791424  | C  | -0.945904 | -3.719557 | 1.098941  |
| C                | 4.497046  | -2.155412 | 0.546556  | C  | -1.929943 | 1.700024  | -2.130639 |
| H                | 5.190343  | -2.847932 | 1.034722  | C  | -2.126228 | -2.428244 | -1.169395 |
| C                | 4.945298  | -1.335774 | -0.492550 | H  | -2.054808 | -3.338151 | -1.788116 |
| H                | 5.983340  | -1.373541 | -0.830799 | H  | -3.021899 | -2.556520 | -0.537788 |
| C                | 4.032779  | -0.463843 | -1.090276 | Ni | -0.680209 | -0.110371 | 0.689073  |
| H                | 4.363045  | 0.187846  | -1.907992 | O  | 1.198069  | 0.284074  | 1.303354  |
| C                | 2.698661  | -0.394607 | -0.685784 | C  | 2.264600  | -0.176783 | 0.633565  |
| C                | 1.738431  | 0.566380  | -1.326947 | C  | 3.202441  | -0.927256 | 1.365704  |
| H                | 0.813228  | 0.022853  | -1.595227 | H  | 3.017134  | -1.085164 | 2.430604  |
| H                | 2.175349  | 0.951288  | -2.261852 | C  | 4.326380  | -1.457044 | 0.741522  |
| C                | 1.366648  | 1.718055  | -0.424110 | H  | 5.037893  | -2.046932 | 1.325598  |
| C                | 2.125281  | 2.896663  | -0.455627 | C  | 4.549111  | -1.230565 | -0.618798 |
| H                | 2.972245  | 2.962015  | -1.147606 | H  | 5.432794  | -1.640862 | -1.112479 |
| C                | 1.819341  | 3.978501  | 0.367789  | C  | 3.633861  | -0.463889 | -1.337817 |
| H                | 2.418422  | 4.891423  | 0.319692  | H  | 3.805908  | -0.267977 | -2.401262 |
| C                | 0.746979  | 3.884197  | 1.252732  | C  | 2.487082  | 0.067369  | -0.740614 |
| H                | 0.497670  | 4.720643  | 1.911782  | C  | 1.487370  | 0.882518  | -1.509370 |
| C                | -0.007489 | 2.709026  | 1.304182  | H  | 0.643788  | 0.226107  | -1.819049 |
| H                | -0.838977 | 2.653275  | 2.015666  | H  | 1.940696  | 1.268991  | -2.434644 |
| C                | 0.288409  | 1.618757  | 0.476741  | C  | 0.962813  | 1.998477  | -0.657201 |
| C                | -1.504360 | 0.074765  | 2.161411  | C  | 1.100759  | 3.346312  | -0.985229 |
| O                | -2.346911 | 0.297770  | 2.920093  | H  | 1.566409  | 3.605652  | -1.942283 |
| H                | -0.548332 | 1.454952  | -2.855213 | C  | 0.669655  | 4.355419  | -0.119647 |
| H                | -2.182779 | 2.162097  | -2.970971 | H  | 0.781334  | 5.406100  | -0.395074 |
| H                | -0.976302 | 2.861864  | -1.857101 | C  | 0.131233  | 3.997495  | 1.121344  |
| H                | -2.780480 | 2.649990  | 0.407776  | H  | -0.184843 | 4.772330  | 1.825933  |
| H                | -3.837739 | 1.229012  | 0.527664  | C  | -0.005775 | 2.661092  | 1.484360  |
| H                | -3.918034 | 2.279000  | -0.915548 | H  | -0.405715 | 2.386985  | 2.463784  |
| H                | -0.250423 | -2.324891 | -2.094244 | C  | 0.330200  | 1.655627  | 0.559103  |
| H                | 0.391804  | -3.251516 | -0.731071 | C  | -1.730260 | -0.077333 | 2.169906  |
| H                | -1.041798 | -3.856780 | -1.618166 | O  | -2.642915 | -0.118591 | 2.884870  |
| H                | -1.066124 | -3.493966 | 1.765731  | H  | 1.631202  | -2.944066 | -0.465526 |
| H                | -2.719976 | -2.865979 | 1.904700  | H  | 0.883130  | -2.210230 | -1.893120 |
| H                | -2.368631 | -4.205301 | 0.770722  | H  | 0.501200  | -3.899153 | -1.462566 |
|                  |           |           |           | H  | -0.072660 | -3.835388 | 1.756464  |
|                  |           |           |           | H  | -1.815596 | -3.530897 | 1.743996  |
|                  |           |           |           | H  | -1.101506 | -4.666159 | 0.558910  |
|                  |           |           |           | H  | -4.126089 | -0.282537 | 0.255154  |
|                  |           |           |           | H  | -3.852985 | 1.465253  | 0.282269  |
|                  |           |           |           | H  | -4.512382 | 0.695936  | -1.188006 |
|                  |           |           |           | H  | -2.749309 | 1.691861  | -2.865295 |
|                  |           |           |           | H  | -0.976597 | 1.652299  | -2.673321 |
|                  |           |           |           |    |           |           |           |
| <b>11-ts(L7)</b> |           |           |           |    |           |           |           |
| P                | -2.087877 | 0.326736  | -0.942799 |    |           |           |           |
| P                | -0.680998 | -2.299747 | -0.016487 |    |           |           |           |
| C                | -2.248950 | -1.172243 | -2.018274 |    |           |           |           |
| H                | -3.192606 | -1.153815 | -2.589008 |    |           |           |           |
| H                | -1.435011 | -1.123555 | -2.762125 |    |           |           |           |
| C                | -3.802671 | 0.571306  | -0.356129 |    |           |           |           |

|                             |           |           |           |   |           |           |           |
|-----------------------------|-----------|-----------|-----------|---|-----------|-----------|-----------|
| H                           | -1.956463 | 2.656889  | -1.590199 | H | -1.703657 | -0.515032 | 2.998736  |
|                             |           |           |           | H | -3.253247 | 0.297129  | 3.330818  |
| <b>12(L7)</b>               |           |           |           | H | -1.920894 | 1.199641  | 2.572108  |
| P                           | 1.647070  | -0.134483 | 0.005881  | C | -3.659191 | -1.530686 | 1.268145  |
| P                           | -1.381339 | -0.799518 | -0.063559 | H | -4.411268 | -1.535009 | 2.073015  |
| C                           | 1.086103  | -1.686715 | 0.874281  | H | -2.947894 | -2.349036 | 1.457477  |
| H                           | 1.884323  | -2.448522 | 0.872034  | C | -4.376171 | -1.749188 | -0.062351 |
| H                           | 0.923320  | -1.415650 | 1.931829  | C | -5.173206 | -3.021464 | -0.108849 |
| C                           | 2.483964  | -0.833345 | -1.472342 | H | -5.682602 | -3.105613 | -1.076513 |
| C                           | -2.234580 | -0.673577 | 1.554643  | H | -5.927288 | -3.029673 | 0.687298  |
| C                           | -2.665676 | -1.619798 | -1.081136 | H | -4.512968 | -3.888125 | 0.017465  |
| C                           | 3.087684  | 0.342962  | 1.030559  | C | -4.618945 | 0.579700  | -0.326447 |
| C                           | -0.201815 | -2.210154 | 0.254496  | C | -5.674096 | 1.647885  | -0.397574 |
| H                           | -0.667765 | -2.994050 | 0.875644  | H | -6.321906 | 1.486520  | -1.267587 |
| H                           | 0.005325  | -2.678069 | -0.723955 | H | -5.212904 | 2.640463  | -0.481673 |
| Ni                          | -0.179494 | 0.974335  | -0.361745 | H | -6.290393 | 1.622505  | 0.509335  |
| C                           | -0.685835 | 2.607640  | -0.094737 | C | -3.712349 | 0.537720  | -1.552034 |
| O                           | -1.050646 | 3.681744  | 0.188797  | H | -4.347058 | 0.374017  | -2.438248 |
| H                           | 3.793087  | -0.488586 | 1.184786  | H | -3.192408 | 1.495274  | -1.698288 |
| H                           | 2.748753  | 0.701320  | 2.012511  | C | -2.726347 | -0.611886 | -1.443018 |
| H                           | 3.626577  | 1.172550  | 0.552159  | C | -1.982317 | -0.856105 | -2.729043 |
| H                           | 3.215695  | -1.614068 | -1.212594 | H | -1.294176 | -1.707017 | -2.635729 |
| H                           | 3.006466  | -0.034408 | -2.017387 | H | -1.402011 | 0.033069  | -3.014257 |
| H                           | 1.742418  | -1.260946 | -2.161680 | H | -2.690453 | -1.077808 | -3.540895 |
| H                           | -2.681762 | -1.628344 | 1.874008  | C | -0.703889 | 1.233246  | -0.077262 |
| H                           | -3.024713 | 0.088408  | 1.499645  | C | -1.388638 | 2.462399  | -0.025761 |
| H                           | -1.525480 | -0.342755 | 2.326475  | H | -2.474374 | 2.462968  | 0.051728  |
| H                           | -3.523548 | -0.944959 | -1.209794 | C | -0.707446 | 3.674043  | 0.002440  |
| H                           | -3.024429 | -2.558711 | -0.631162 | C | -2.699267 | 4.934718  | 0.073752  |
| H                           | -2.272313 | -1.840582 | -2.083443 | H | -3.128788 | 4.510564  | -0.849374 |
|                             |           |           |           | H | -2.974569 | 5.993475  | 0.130946  |
| <b>LiNi(CO)<sub>2</sub></b> |           |           |           | H | -3.131087 | 4.411463  | 0.942873  |
| P                           | -1.529293 | -0.403334 | 0.016574  | C | 0.711492  | 3.673571  | -0.011397 |
| P                           | 1.529659  | -0.406770 | 0.009162  | C | 2.704259  | 4.934692  | 0.011564  |
| O                           | -5.283638 | -0.668482 | -0.241573 | H | 3.157128  | 4.420297  | 0.875304  |
| O                           | -3.871200 | 0.832872  | 0.858696  | H | 2.980419  | 5.994020  | 0.051558  |
| O                           | -3.454530 | -1.813507 | -1.147639 | H | 3.111203  | 4.501176  | -0.917394 |
| O                           | -1.293487 | 4.882815  | 0.065998  | C | 1.392034  | 2.461636  | -0.049331 |
| O                           | 1.298835  | 4.882357  | 0.039278  | H | 2.478642  | 2.463739  | 0.012160  |
| O                           | 3.866969  | 0.836475  | 0.851768  | C | 0.706666  | 1.232165  | -0.088046 |
| O                           | 5.286159  | -0.672064 | -0.229626 | C | 4.620355  | 0.574574  | -0.327800 |
| O                           | 3.461365  | -1.825994 | -1.132413 | C | 5.674983  | 1.643020  | -0.403392 |
| C                           | -2.939156 | -0.186016 | 1.258852  | H | 6.286321  | 1.627034  | 0.507083  |
| C                           | -2.422063 | 0.221778  | 2.614687  | H | 5.213861  | 2.634451  | -0.499905 |

|                  |           |           |           |                  |           |           |           |
|------------------|-----------|-----------|-----------|------------------|-----------|-----------|-----------|
| H                | 6.327695  | 1.473576  | -1.268178 | C                | -3.442203 | -3.593135 | 0.058998  |
| C                | 4.379176  | -1.751993 | -0.044580 | H                | -3.124663 | -4.637328 | 0.111681  |
| C                | 5.177596  | -3.023843 | -0.077307 | C                | -2.487910 | -2.586501 | -0.054132 |
| H                | 4.517859  | -3.890077 | 0.054345  | H                | -1.423890 | -2.848926 | -0.066720 |
| H                | 5.928924  | -3.024329 | 0.721512  | C                | -2.451281 | 1.571030  | -0.631055 |
| H                | 5.690570  | -3.115866 | -1.042359 | C                | -2.426020 | 2.661105  | 0.245800  |
| C                | 3.656481  | -1.523237 | 1.280962  | H                | -1.875987 | 2.580800  | 1.188234  |
| H                | 2.946505  | -2.341640 | 1.474715  | C                | -3.101988 | 3.841596  | -0.065370 |
| H                | 4.405214  | -1.518772 | 2.088971  | H                | -3.076031 | 4.681093  | 0.633435  |
| C                | 2.934327  | -0.180209 | 1.256620  | C                | -3.804329 | 3.948800  | -1.263663 |
| C                | 2.410058  | 0.238515  | 2.606383  | H                | -4.332766 | 4.873184  | -1.509492 |
| H                | 1.689020  | -0.494937 | 2.992042  | C                | -3.836997 | 2.868962  | -2.147267 |
| H                | 1.909570  | 1.216185  | 2.553378  | H                | -4.391372 | 2.945139  | -3.086068 |
| H                | 3.237146  | 0.319046  | 3.326663  | C                | -3.166994 | 1.689578  | -1.833444 |
| C                | 2.733932  | -0.627535 | -1.442561 | H                | -3.221197 | 0.845166  | -2.527392 |
| C                | 3.719633  | 0.521447  | -1.557586 | C                | 2.434238  | -1.604280 | -0.611185 |
| H                | 3.199692  | 1.477277  | -1.714721 | C                | 3.284445  | -1.703525 | -1.724637 |
| H                | 4.358869  | 0.350309  | -2.439079 | H                | 3.476571  | -0.824288 | -2.347673 |
| C                | 1.996070  | -0.887208 | -2.729060 | C                | 3.903787  | -2.910564 | -2.037097 |
| H                | 2.708298  | -1.111067 | -3.536711 | H                | 4.568637  | -2.971559 | -2.902188 |
| H                | 1.409585  | -0.005225 | -3.023791 | C                | 3.675029  | -4.039693 | -1.248214 |
| H                | 1.314649  | -1.742887 | -2.629098 | H                | 4.162136  | -4.986492 | -1.494438 |
| Ni               | -0.001684 | -1.942311 | 0.368896  | C                | 2.827094  | -3.955218 | -0.146515 |
| C                | 0.007913  | -2.514900 | 2.040971  | H                | 2.643262  | -4.835094 | 0.474537  |
| O                | 0.016448  | -2.933273 | 3.124038  | C                | 2.211132  | -2.743542 | 0.169235  |
| C                | -0.022122 | -3.258419 | -0.822708 | H                | 1.549638  | -2.676734 | 1.038021  |
| O                | -0.042944 | -4.159495 | -1.551089 | C                | 2.903744  | 1.219253  | -0.151893 |
| <b>L2Ni(CO)2</b> |           |           |           | C                | 2.522966  | 2.571378  | -0.138493 |
| P                | -1.554249 | 0.030237  | -0.188737 | H                | 1.461068  | 2.838153  | -0.192316 |
| P                | 1.575063  | -0.037743 | -0.186450 | C                | 3.477967  | 3.577890  | -0.031685 |
| C                | -0.655540 | -0.374513 | -1.767519 | H                | 3.163616  | 4.624288  | -0.025773 |
| H                | -0.512129 | -1.467964 | -1.786889 | C                | 4.830641  | 3.251564  | 0.080519  |
| H                | -1.259782 | -0.127358 | -2.654156 | H                | 5.580318  | 4.041231  | 0.170496  |
| C                | 0.681584  | 0.341026  | -1.774498 | C                | 5.217358  | 1.913465  | 0.090226  |
| H                | 0.538096  | 1.433636  | -1.818231 | H                | 6.273023  | 1.648469  | 0.189120  |
| H                | 1.291696  | 0.069925  | -2.650617 | C                | 4.262437  | 0.903011  | -0.024141 |
| C                | -2.873486 | -1.238090 | -0.131363 | H                | 4.583360  | -0.141441 | -0.006351 |
| C                | -4.236816 | -0.923861 | -0.059789 | Ni               | 0.010682  | 0.035611  | 1.388271  |
| H                | -4.562888 | 0.118652  | -0.096573 | C                | 0.250785  | 1.556080  | 2.269568  |
| C                | -5.190816 | -1.933886 | 0.065798  | O                | 0.471174  | 2.530573  | 2.857027  |
| H                | -6.250005 | -1.670672 | 0.122221  | C                | -0.196302 | -1.395516 | 2.414964  |
| C                | -4.799033 | -3.269309 | 0.118405  | O                | -0.371776 | -2.305111 | 3.111590  |
| H                | -5.548151 | -4.058706 | 0.215111  | <b>L3Ni(CO)2</b> |           |           |           |

|    |           |           |           |                  |           |           |           |
|----|-----------|-----------|-----------|------------------|-----------|-----------|-----------|
| Ni | -0.000283 | 0.001008  | 1.236493  | H                | 2.929009  | -1.635306 | -2.620154 |
| P  | 1.616844  | 0.009843  | -0.349144 | C                | -3.934601 | 1.178837  | 0.683525  |
| P  | -1.617206 | -0.010168 | -0.349061 | H                | -4.571327 | 2.072247  | 0.785185  |
| C  | 0.726089  | -0.231626 | -1.969559 | H                | -3.450246 | 1.009885  | 1.658343  |
| H  | 1.280445  | 0.236069  | -2.801427 | H                | -4.607072 | 0.333203  | 0.483713  |
| H  | 0.769814  | -1.314607 | -2.162896 | C                | -3.609753 | -1.731308 | -1.593152 |
| C  | 2.505270  | 1.691139  | -0.546875 | H                | -3.915748 | -2.776865 | -1.764739 |
| C  | -2.504247 | -1.692241 | -0.545631 | H                | -3.293274 | -1.331557 | -2.568530 |
| C  | -2.915107 | 1.389032  | -0.433146 | H                | -4.512782 | -1.192422 | -1.275103 |
| C  | 2.914050  | -1.389978 | -0.432187 | C                | -1.415440 | -2.687247 | -0.941381 |
| C  | -0.726663 | 0.230737  | -1.969595 | H                | -1.810134 | -3.714788 | -0.892008 |
| H  | -1.281103 | -0.236967 | -2.801404 | H                | -0.556168 | -2.632868 | -0.256681 |
| H  | -0.770424 | 1.313725  | -2.162927 | H                | -1.055294 | -2.535417 | -1.970621 |
| C  | 3.934327  | -1.178390 | 0.683519  | C                | -3.066505 | -2.128040 | 0.806050  |
| H  | 4.571390  | -2.071497 | 0.785676  | H                | -3.494718 | -3.139776 | 0.719601  |
| H  | 3.450701  | -1.008489 | 1.658523  | H                | -3.865651 | -1.472629 | 1.175189  |
| H  | 4.606390  | -0.332759 | 0.482234  | H                | -2.288387 | -2.168149 | 1.580607  |
| C  | 2.185961  | -2.710278 | -0.177195 | C                | 0.078681  | -1.436480 | 2.261958  |
| H  | 2.924536  | -3.526360 | -0.128962 | O                | 0.172892  | -2.314567 | 3.017779  |
| H  | 1.489907  | -2.969506 | -0.988209 | C                | -0.077960 | 1.439642  | 2.259903  |
| H  | 1.627888  | -2.721774 | 0.768137  | O                | -0.173165 | 2.319416  | 3.013442  |
| C  | 3.068596  | 2.127102  | 0.804329  |                  |           |           |           |
| H  | 3.497234  | 3.138605  | 0.717339  |                  |           |           |           |
| H  | 3.867726  | 1.471400  | 1.173030  | <b>L4Ni(CO)2</b> |           |           |           |
| H  | 2.291140  | 2.167701  | 1.579488  | P                | -1.573164 | 0.037811  | -0.043029 |
| C  | -2.187139 | 2.709821  | -0.180453 | P                | 1.533710  | 0.160409  | -0.117757 |
| H  | -2.925693 | 3.526003  | -0.133592 | C                | -0.707263 | -0.236047 | -1.671984 |
| H  | -1.491140 | 2.967618  | -0.991994 | H                | -0.530770 | -1.319935 | -1.765893 |
| H  | -1.628898 | 2.722898  | 0.764741  | H                | -1.353427 | 0.050063  | -2.516384 |
| C  | 1.417382  | 2.687030  | -0.942971 | C                | 0.605234  | 0.524250  | -1.677918 |
| H  | 1.813175  | 3.714184  | -0.894284 | H                | 0.426114  | 1.612734  | -1.666819 |
| H  | 0.558242  | 2.633969  | -0.257983 | H                | 1.205093  | 0.329552  | -2.580805 |
| H  | 1.056841  | 2.534982  | -1.972026 | C                | -2.756141 | -1.360090 | 0.001489  |
| C  | 3.610730  | 1.728208  | -1.594447 | C                | -4.129252 | -1.193352 | 0.211351  |
| H  | 3.917528  | 2.773323  | -1.767247 | H                | -4.591567 | -0.207995 | 0.289746  |
| H  | 3.294040  | 1.327440  | -2.569345 | C                | -4.934396 | -2.322013 | 0.327115  |
| H  | 4.513290  | 1.188996  | -1.275637 | C                | -4.432366 | -3.613532 | 0.244704  |
| C  | -3.629656 | 1.523208  | -1.778252 | H                | -5.081232 | -4.483945 | 0.337130  |
| H  | -4.247774 | 2.436043  | -1.768897 | C                | -3.062170 | -3.746652 | 0.049323  |
| H  | -4.305939 | 0.693465  | -2.008401 | C                | -2.216052 | -2.653465 | -0.064482 |
| H  | -2.931546 | 1.632546  | -2.621255 | H                | -1.142829 | -2.828843 | -0.180672 |
| C  | 3.627661  | -1.525741 | -1.777645 | C                | -2.621016 | 1.499211  | -0.423709 |
| H  | 4.245330  | -2.438860 | -1.767970 | C                | -2.509526 | 2.634691  | 0.381848  |
| H  | 4.304192  | -0.696412 | -2.008763 | H                | -1.846691 | 2.655885  | 1.250041  |
|    |           |           |           | C                | -3.262926 | 3.762282  | 0.067556  |

|                  |           |           |           |    |           |           |           |
|------------------|-----------|-----------|-----------|----|-----------|-----------|-----------|
| C                | -4.126578 | 3.800128  | -1.018046 | H  | -0.413841 | 1.144463  | 1.880038  |
| H                | -4.709272 | 4.691784  | -1.248890 | H  | -1.260643 | -0.220315 | 2.591641  |
| C                | -4.218562 | 2.653538  | -1.799882 | C  | 2.924041  | -1.601213 | 0.122261  |
| C                | -3.483394 | 1.507267  | -1.529773 | C  | 4.247630  | -1.230922 | -0.130795 |
| H                | -3.603261 | 0.636868  | -2.179030 | H  | 4.519659  | -0.180549 | -0.258561 |
| C                | 2.392989  | -1.424661 | -0.446215 | C  | 5.252442  | -2.207104 | -0.239153 |
| C                | 2.401860  | -2.048688 | -1.698737 | C  | 4.944933  | -3.563336 | -0.087777 |
| H                | 1.924289  | -1.614254 | -2.578345 | H  | 5.725382  | -4.320315 | -0.168365 |
| C                | 3.050398  | -3.272120 | -1.837062 | C  | 3.617849  | -3.935486 | 0.163780  |
| C                | 3.702694  | -3.896656 | -0.783503 | C  | 2.615484  | -2.960243 | 0.258544  |
| H                | 4.205096  | -4.854828 | -0.913591 | H  | 1.584151  | -3.282776 | 0.423630  |
| C                | 3.682854  | -3.249228 | 0.447108  | C  | 2.385491  | 1.210501  | 0.424022  |
| C                | 3.032013  | -2.038458 | 0.640559  | C  | 2.278092  | 2.220986  | -0.533905 |
| H                | 3.024748  | -1.586418 | 1.635990  | H  | 1.726196  | 2.037428  | -1.460226 |
| C                | 2.881884  | 1.399922  | -0.185817 | C  | 2.874620  | 3.475953  | -0.323500 |
| C                | 2.540970  | 2.720260  | 0.138999  | C  | 3.580691  | 3.726526  | 0.858166  |
| H                | 1.526341  | 2.990358  | 0.444580  | H  | 4.041295  | 4.700191  | 1.028280  |
| C                | 3.518016  | 3.703795  | 0.070724  | C  | 3.695802  | 2.711715  | 1.818300  |
| C                | 4.832737  | 3.423786  | -0.284736 | C  | 3.100834  | 1.458824  | 1.599952  |
| H                | 5.590014  | 4.206550  | -0.321638 | H  | 3.216444  | 0.680475  | 2.359190  |
| C                | 5.141074  | 2.104306  | -0.586483 | C  | -2.916772 | -1.256533 | 0.475003  |
| C                | 4.195834  | 1.084814  | -0.547365 | C  | -3.660121 | -1.213460 | 1.658858  |
| H                | 4.502182  | 0.069738  | -0.806483 | H  | -3.462909 | -0.452069 | 2.418033  |
| Ni               | 0.022127  | 0.108998  | 1.489161  | C  | -4.685096 | -2.145544 | 1.887597  |
| F                | -3.147301 | 4.848843  | 0.833037  | C  | -4.979295 | -3.121131 | 0.926206  |
| F                | -5.047944 | 2.662613  | -2.846724 | H  | -5.773434 | -3.846744 | 1.103958  |
| F                | -6.245972 | -2.157880 | 0.520409  | C  | -4.247599 | -3.152699 | -0.266194 |
| F                | -2.544439 | -4.975446 | -0.022895 | C  | -3.217343 | -2.223473 | -0.486017 |
| F                | 3.191502  | 4.964436  | 0.362892  | H  | -2.646403 | -2.259617 | -1.418397 |
| F                | 6.395602  | 1.806406  | -0.935073 | C  | -2.379690 | 1.527825  | -0.009167 |
| F                | 3.050549  | -3.867592 | -3.032953 | C  | -1.556097 | 2.659025  | -0.056442 |
| F                | 4.307320  | -3.821801 | 1.477530  | H  | -0.469242 | 2.545455  | 0.023584  |
| C                | 0.053633  | -1.463417 | 2.323021  | C  | -2.101647 | 3.939594  | -0.214176 |
| O                | 0.071348  | -2.491855 | 2.850386  | C  | -3.486271 | 4.099709  | -0.365238 |
| C                | 0.126005  | 1.531785  | 2.547261  | H  | -3.916751 | 5.092764  | -0.495865 |
| O                | 0.253934  | 2.429518  | 3.266894  | C  | -4.307570 | 2.967217  | -0.350217 |
|                  |           |           |           | C  | -3.757225 | 1.686165  | -0.166461 |
|                  |           |           |           | H  | -4.426190 | 0.822592  | -0.153609 |
| <b>L5Ni(CO)2</b> |           |           |           | Ni | -0.033778 | -0.558376 | -1.420109 |
| P                | 1.544276  | -0.396557 | 0.108117  | C  | -1.236979 | 5.077608  | -0.207665 |
| P                | -1.536927 | -0.095157 | 0.120355  | N  | -0.513253 | 5.989459  | -0.180654 |
| C                | 0.663074  | -0.725471 | 1.708474  | C  | -5.720761 | 3.111546  | -0.511301 |
| H                | 0.452247  | -1.807109 | 1.731313  | N  | -6.872876 | 3.220308  | -0.639413 |
| H                | 1.291334  | -0.511156 | 2.586879  | C  | 2.756373  | 4.497123  | -1.317117 |
| C                | -0.628181 | 0.072258  | 1.740003  |    |           |           |           |



|   |           |           |           |   |           |           |           |
|---|-----------|-----------|-----------|---|-----------|-----------|-----------|
| N | 2.659670  | 5.323132  | -2.131523 | H | -3.144645 | 4.336417  | 1.165992  |
| C | 4.417104  | 2.949624  | 3.029411  | C | 0.708735  | 3.572259  | 0.253226  |
| N | 5.000755  | 3.127270  | 4.021093  | C | 2.698198  | 4.836852  | 0.280337  |
| C | 6.599810  | -1.808395 | -0.501520 | H | 3.143768  | 4.338884  | 1.156745  |
| N | 7.695723  | -1.477693 | -0.714375 | H | 2.972194  | 5.897098  | 0.301837  |
| C | 3.282020  | -5.315712 | 0.324157  | H | 3.116018  | 4.383374  | -0.634072 |
| N | 3.003337  | -6.437570 | 0.463567  | C | 1.395071  | 2.362365  | 0.213370  |
| C | -5.427516 | -2.095380 | 3.108102  | H | 2.485153  | 2.358208  | 0.233703  |
| N | -6.023945 | -2.043656 | 4.106717  | C | 0.703616  | 1.138703  | 0.177175  |
| C | -4.547942 | -4.138906 | -1.256404 | C | 4.358641  | 0.343797  | -1.035241 |
| N | -4.797583 | -4.940786 | -2.062572 | C | 4.148666  | -1.934400 | -0.660319 |
| C | 0.006233  | -2.258953 | -1.951758 | C | 3.858062  | -1.692237 | 0.814096  |
| O | 0.091550  | -3.363558 | -2.277928 | H | 3.205144  | -2.481008 | 1.214471  |
| C | -0.157039 | 0.673867  | -2.706660 | H | 4.808686  | -1.712532 | 1.366562  |
| O | -0.315401 | 1.472511  | -3.525030 | C | 3.202533  | -0.323984 | 0.947602  |

### L6Ni(CO)2

|   |           |           |           |
|---|-----------|-----------|-----------|
| P | -1.493313 | -0.512946 | 0.204483  |
| P | 1.493276  | -0.511734 | 0.203632  |
| O | -5.003264 | -0.908273 | -1.123165 |
| O | -4.017007 | 0.656971  | 0.299918  |
| O | -2.974039 | -2.018211 | -1.443738 |
| O | -1.296504 | 4.781038  | 0.301335  |
| O | 1.292126  | 4.782084  | 0.298795  |
| O | 4.016010  | 0.660135  | 0.300270  |
| O | 5.004500  | -0.905224 | -1.121173 |
| O | 2.976232  | -2.016753 | -1.442466 |
| C | -3.203269 | -0.326920 | 0.947240  |
| C | -3.857573 | -1.695645 | 0.812412  |
| H | -4.808545 | -1.717055 | 1.364237  |
| H | -3.204279 | -2.484141 | 1.212725  |
| C | -4.147020 | -1.937141 | -0.662335 |
| C | -4.358348 | 0.341138  | -1.036054 |
| C | -3.143879 | 0.328647  | -1.950318 |
| H | -3.485557 | 0.149102  | -2.981162 |
| H | -2.625644 | 1.298060  | -1.934140 |
| C | -2.231189 | -0.799502 | -1.507425 |
| C | -0.705086 | 1.138130  | 0.178211  |
| C | -1.397586 | 2.361154  | 0.215625  |
| H | -2.487638 | 2.355966  | 0.237306  |
| C | -0.712252 | 3.571665  | 0.254553  |
| C | -2.702681 | 4.834870  | 0.288050  |
| H | -3.123613 | 4.381394  | -0.624932 |
| H | -2.977279 | 5.894933  | 0.310814  |

|    |           |           |           |
|----|-----------|-----------|-----------|
| H  | -3.144645 | 4.336417  | 1.165992  |
| C  | 0.708735  | 3.572259  | 0.253226  |
| C  | 2.698198  | 4.836852  | 0.280337  |
| H  | 3.143768  | 4.338884  | 1.156745  |
| H  | 2.972194  | 5.897098  | 0.301837  |
| H  | 3.116018  | 4.383374  | -0.634072 |
| C  | 1.395071  | 2.362365  | 0.213370  |
| H  | 2.485153  | 2.358208  | 0.233703  |
| C  | 0.703616  | 1.138703  | 0.177175  |
| C  | 4.358641  | 0.343797  | -1.035241 |
| C  | 4.148666  | -1.934400 | -0.660319 |
| C  | 3.858062  | -1.692237 | 0.814096  |
| H  | 3.205144  | -2.481008 | 1.214471  |
| H  | 4.808686  | -1.712532 | 1.366562  |
| C  | 3.202533  | -0.323984 | 0.947602  |
| C  | 2.232646  | -0.798585 | -1.507579 |
| C  | 3.144916  | 0.329902  | -1.950463 |
| H  | 2.625942  | 1.298941  | -1.935366 |
| H  | 3.487570  | 0.149943  | -2.980913 |
| Ni | 0.000821  | -1.967033 | 0.871054  |
| C  | 0.002108  | -2.186148 | 2.628894  |
| O  | 0.003179  | -2.319817 | 3.780511  |
| H  | 4.680670  | -2.880713 | -0.826371 |
| H  | 5.097749  | 1.100294  | -1.334369 |
| H  | 3.119861  | -0.006001 | 1.997670  |
| H  | -3.121701 | -0.009535 | 1.997577  |
| H  | -1.415671 | -0.978202 | -2.224108 |
| H  | -5.097740 | 1.097297  | -1.335330 |
| H  | -4.678261 | -2.883728 | -0.829278 |
| H  | 1.417848  | -0.978326 | -2.224819 |
| C  | 0.001045  | -3.399634 | -0.185314 |
| O  | 0.000697  | -4.318606 | -0.887845 |

### L7Ni(CO)2

|   |           |           |           |
|---|-----------|-----------|-----------|
| P | -1.607388 | -0.044826 | 0.016627  |
| P | 1.607179  | -0.044797 | -0.016431 |
| C | -0.681389 | 1.556107  | 0.341293  |
| H | -1.283728 | 2.435754  | 0.047747  |
| H | -0.561036 | 1.623427  | 1.436861  |
| C | -2.494039 | 0.391511  | -1.549022 |
| C | 2.496496  | 0.387822  | 1.548787  |
| C | 3.015693  | 0.206145  | -1.188216 |
| C | -3.017373 | 0.203337  | 1.187021  |
| C | 0.680917  | 1.556940  | -0.336721 |

|    |           |           |           |   |           |           |           |
|----|-----------|-----------|-----------|---|-----------|-----------|-----------|
| H  | 1.283182  | 2.435980  | -0.041311 | H | 1.949143  | -2.571987 | 1.031270  |
| H  | 0.560253  | 1.626798  | -1.432083 | H | 3.459396  | -2.211302 | 0.217350  |
| Ni | -0.000040 | -1.316141 | -0.000955 | C | -2.348089 | -1.825087 | -0.651947 |
| H  | -3.494915 | 1.191656  | 1.081404  | H | -1.879575 | -2.804253 | -0.456144 |
| H  | -2.668998 | 0.098232  | 2.224966  | H | -3.205607 | -2.051901 | -1.319227 |
| H  | -3.786980 | -0.565804 | 1.024738  | C | -2.517278 | 1.304011  | -0.967413 |
| H  | -3.045348 | 1.343421  | -1.476582 | H | -3.460619 | 0.741448  | -1.053385 |
| H  | -3.210079 | -0.401526 | -1.811538 | H | -2.640825 | 2.156883  | -1.652983 |
| H  | -1.778592 | 0.467341  | -2.380788 | C | -2.854436 | -1.240911 | 0.666982  |
| H  | 3.044702  | 1.341698  | 1.478863  | H | -3.236586 | -2.053276 | 1.304475  |
| H  | 3.215903  | -0.404078 | 1.805587  | H | -3.722661 | -0.587940 | 0.492637  |
| H  | 1.783403  | 0.457632  | 2.383061  | C | -2.342415 | 1.843843  | 0.454743  |
| H  | 3.784731  | -0.564452 | -1.030305 | H | -3.319257 | 2.176406  | 0.860566  |
| H  | 3.494534  | 1.193544  | -1.079732 | H | -1.733287 | 2.762204  | 0.414269  |
| H  | 2.665398  | 0.105498  | -2.225948 |   |           |           |           |

**<sup>32</sup>(L1)**

|                                        |           |           |           |    |           |           |           |
|----------------------------------------|-----------|-----------|-----------|----|-----------|-----------|-----------|
| <b><sup>3</sup>Ni(COD)<sub>2</sub></b> |           |           |           | Ni | 0.542944  | -0.538434 | 0.087583  |
| Ni                                     | -0.021549 | -0.114461 | 0.069154  | P  | -0.267176 | 1.475816  | 0.169916  |
| C                                      | -1.367365 | 0.443616  | -1.449768 | P  | -1.502542 | -1.316853 | 0.065357  |
| H                                      | -0.745165 | 0.886603  | -2.236771 | O  | 1.463725  | 4.817570  | 0.372534  |
| C                                      | -1.329657 | -0.958300 | -1.338770 | O  | -0.187980 | 3.965997  | -1.040897 |
| H                                      | -0.706294 | -1.486319 | -2.070990 | O  | 1.506092  | 2.831055  | 1.611654  |
| C                                      | -1.802670 | -0.473129 | 1.430665  | O  | -5.026782 | 3.343938  | -1.202346 |
| H                                      | -1.311276 | -1.000849 | 2.256739  | O  | -6.090232 | 0.968762  | -1.190855 |
| C                                      | -1.663260 | 0.894568  | 1.394562  | O  | -3.379508 | -3.120380 | -0.879006 |
| H                                      | -1.068011 | 1.356874  | 2.189436  | O  | -2.763325 | -4.813097 | 0.612302  |
| C                                      | 1.689558  | -1.435390 | -0.735377 | O  | -1.173059 | -3.434578 | 1.632572  |
| H                                      | 1.112314  | -2.266705 | -1.154227 | O  | 3.719191  | -1.282556 | -1.867021 |
| C                                      | 1.853371  | -0.329359 | -1.532424 | C  | 0.422782  | 2.669425  | -1.125231 |
| H                                      | 1.290690  | -0.298348 | -2.472762 | C  | 0.173671  | 2.155905  | -2.520283 |
| C                                      | 1.463137  | 0.312073  | 1.518971  | H  | 0.626822  | 1.162282  | -2.651890 |
| H                                      | 0.927026  | 0.311643  | 2.476567  | H  | 0.612342  | 2.839059  | -3.262115 |
| C                                      | 1.245008  | 1.435425  | 0.696740  | H  | -0.902419 | 2.071764  | -2.730294 |
| H                                      | 0.598447  | 2.222933  | 1.101424  | C  | 1.906585  | 2.789222  | -0.788471 |
| C                                      | 2.782748  | 0.814696  | -1.258354 | H  | 2.421923  | 3.344134  | -1.588985 |
| H                                      | 3.698882  | 0.448522  | -0.772170 | H  | 2.361743  | 1.787381  | -0.713553 |
| H                                      | 3.122453  | 1.246496  | -2.212549 | C  | 2.083915  | 3.546915  | 0.525391  |
| C                                      | 2.130820  | 1.918454  | -0.420741 | C  | 3.518577  | 3.795714  | 0.891856  |
| H                                      | 2.911121  | 2.600444  | -0.023657 | H  | 3.565537  | 4.380194  | 1.819076  |
| H                                      | 1.518914  | 2.551724  | -1.085476 | H  | 4.026087  | 4.355405  | 0.096559  |
| C                                      | 2.675170  | -0.590746 | 1.455679  | H  | 4.037127  | 2.842910  | 1.052596  |
| H                                      | 2.884980  | -0.984083 | 2.462389  | C  | 0.071870  | 4.713337  | 0.145374  |
| H                                      | 3.575281  | -0.012299 | 1.192851  | C  | -0.446968 | 6.101688  | -0.106376 |
| C                                      | 2.482671  | -1.768434 | 0.498794  | H  | -0.246938 | 6.746513  | 0.757783  |

|   |           |           |           |                    |           |           |           |
|---|-----------|-----------|-----------|--------------------|-----------|-----------|-----------|
| H | -1.528809 | 6.084628  | -0.289657 | C                  | -2.023776 | -2.279321 | 1.610889  |
| H | 0.050940  | 6.529568  | -0.985137 | C                  | -3.468548 | -2.736723 | 1.527413  |
| C | -0.548279 | 4.042818  | 1.369332  | H                  | -4.149589 | -1.879428 | 1.421202  |
| H | -0.339461 | 4.678665  | 2.245322  | H                  | -3.734207 | -3.249482 | 2.466376  |
| H | -1.641065 | 3.970117  | 1.275658  | C                  | -1.715880 | -1.488429 | 2.854316  |
| C | 0.078234  | 2.679373  | 1.598776  | H                  | -1.878334 | -2.103924 | 3.751338  |
| C | -0.300844 | 2.062605  | 2.919343  | H                  | -2.363870 | -0.602629 | 2.920919  |
| H | 0.201899  | 1.093445  | 3.050564  | H                  | -0.668547 | -1.150852 | 2.844154  |
| H | -1.387689 | 1.907286  | 2.980303  | C                  | 5.057859  | -1.518030 | -1.667917 |
| H | 0.000496  | 2.719830  | 3.748370  | C                  | 5.639850  | -2.567763 | -2.378453 |
| C | -2.066238 | 1.376127  | -0.174811 | H                  | 5.003970  | -3.184101 | -3.016915 |
| C | -2.868992 | 2.480661  | -0.514144 | C                  | 7.007376  | -2.807066 | -2.262206 |
| H | -2.417478 | 3.469040  | -0.569807 | H                  | 7.462209  | -3.631883 | -2.816107 |
| C | -4.211310 | 2.333227  | -0.851813 | C                  | 7.788576  | -1.998451 | -1.437534 |
| C | -4.484539 | 4.641327  | -1.250259 | H                  | 8.860848  | -2.183507 | -1.340436 |
| H | -4.134234 | 4.975699  | -0.259206 | C                  | 7.196438  | -0.946997 | -0.739025 |
| H | -5.290220 | 5.307803  | -1.576441 | H                  | 7.805570  | -0.304396 | -0.096274 |
| H | -3.652886 | 4.714992  | -1.970463 | C                  | 5.828353  | -0.683784 | -0.846915 |
| C | -4.789407 | 1.036686  | -0.857597 | C                  | 5.156516  | 0.441187  | -0.117092 |
| C | -6.711056 | -0.294229 | -1.156728 | H                  | 4.633671  | 1.076088  | -0.860399 |
| H | -6.268638 | -0.996349 | -1.882614 | H                  | 5.911645  | 1.081679  | 0.360473  |
| H | -7.762466 | -0.135634 | -1.419112 | C                  | 4.169514  | -0.041915 | 0.906602  |
| H | -6.663152 | -0.743521 | -0.150739 | C                  | 4.269965  | 0.348599  | 2.226349  |
| C | -3.994383 | -0.061741 | -0.546809 | H                  | 5.100160  | 1.004011  | 2.510584  |
| H | -4.414648 | -1.064640 | -0.616252 | C                  | 3.337531  | -0.055070 | 3.214350  |
| C | -2.637835 | 0.086036  | -0.205313 | H                  | 3.453943  | 0.273782  | 4.249175  |
| C | -3.647296 | -3.729183 | 0.381042  | C                  | 2.285522  | -0.883624 | 2.840058  |
| C | -5.038142 | -4.291474 | 0.287940  | H                  | 1.583920  | -1.253061 | 3.595164  |
| H | -5.092259 | -5.008739 | -0.539980 | C                  | 2.120071  | -1.288797 | 1.513050  |
| H | -5.764644 | -3.489292 | 0.104925  | H                  | 1.434071  | -2.122118 | 1.296520  |
| H | -5.308711 | -4.807029 | 1.217453  | C                  | 3.077129  | -0.887880 | 0.491943  |
| C | -1.400254 | -4.407248 | 0.612676  | C                  | 2.797643  | -1.292146 | -0.839091 |
| C | -0.569522 | -5.603244 | 0.979903  | O                  | 1.638432  | -1.692105 | -1.190909 |
| H | 0.494543  | -5.337192 | 0.994043  |                    |           |           |           |
| H | -0.721609 | -6.412783 | 0.256069  | <sup>34</sup> (L1) |           |           |           |
| H | -0.856157 | -5.962678 | 1.975579  | Ni                 | 0.666216  | -0.806036 | -0.309643 |
| C | -1.081570 | -3.848208 | -0.770756 | P                  | 0.566542  | 1.466585  | -0.084580 |
| H | -0.034018 | -3.513408 | -0.824222 | P                  | -1.595573 | -0.790239 | 0.267959  |
| H | -1.221693 | -4.652721 | -1.510185 | O                  | 3.168218  | 4.170703  | 0.369821  |
| C | -2.024798 | -2.695598 | -1.103167 | O                  | 1.315803  | 3.968483  | -1.041694 |
| C | -1.927414 | -2.255716 | -2.541363 | O                  | 2.709181  | 2.107254  | 1.374689  |
| H | -0.900212 | -1.939538 | -2.772993 | O                  | -3.418966 | 4.739698  | -1.150989 |
| H | -2.605208 | -1.416119 | -2.752148 | O                  | -5.205122 | 2.860784  | -0.907112 |
| H | -2.194947 | -3.085686 | -3.211425 | O                  | -4.065223 | -1.808101 | -0.482482 |

|   |           |           |           |   |           |           |           |
|---|-----------|-----------|-----------|---|-----------|-----------|-----------|
| O | -4.040636 | -3.545352 | 1.080461  | C | -2.171869 | 0.909545  | -0.079288 |
| O | -1.993229 | -2.817067 | 1.947938  | C | -4.468066 | -2.222024 | 0.820031  |
| O | 0.607525  | -2.133329 | -1.712787 | C | -5.971380 | -2.223197 | 0.817315  |
| C | 1.524651  | 2.571582  | -1.291014 | H | -6.340547 | -2.902828 | 0.039710  |
| C | 1.101665  | 2.312816  | -2.714935 | H | -6.356906 | -1.215674 | 0.615113  |
| H | 1.247702  | 1.255514  | -2.978553 | H | -6.355582 | -2.558569 | 1.788077  |
| H | 1.697463  | 2.927410  | -3.404910 | C | -2.624591 | -3.676814 | 1.002988  |
| H | 0.041379  | 2.557057  | -2.870354 | C | -2.275187 | -5.079344 | 1.409718  |
| C | 2.996741  | 2.261272  | -1.037684 | H | -1.189161 | -5.225215 | 1.366771  |
| H | 3.602243  | 2.771793  | -1.803263 | H | -2.758066 | -5.802342 | 0.741565  |
| H | 3.197137  | 1.183977  | -1.114992 | H | -2.615165 | -5.264473 | 2.435867  |
| C | 3.422284  | 2.772602  | 0.335320  | C | -2.202659 | -3.337201 | -0.421723 |
| C | 4.880936  | 2.565989  | 0.624150  | H | -1.111461 | -3.411680 | -0.533865 |
| H | 5.123452  | 2.969508  | 1.614755  | H | -2.669808 | -4.063612 | -1.106135 |
| H | 5.496062  | 3.078105  | -0.125518 | C | -2.668462 | -1.934279 | -0.792897 |
| H | 5.120471  | 1.495376  | 0.612993  | C | -2.524942 | -1.626749 | -2.260360 |
| C | 1.794234  | 4.468490  | 0.207387  | H | -1.477752 | -1.750976 | -2.567108 |
| C | 1.659694  | 5.963538  | 0.139064  | H | -2.850284 | -0.601455 | -2.489144 |
| H | 2.034478  | 6.424165  | 1.060833  | H | -3.151675 | -2.316257 | -2.844833 |
| H | 0.609001  | 6.249818  | 0.003367  | C | -2.346376 | -1.434612 | 1.897464  |
| H | 2.240538  | 6.349208  | -0.707523 | C | -3.862608 | -1.318752 | 1.888142  |
| C | 1.043181  | 3.838749  | 1.375125  | H | -4.183461 | -0.274650 | 1.761738  |
| H | 1.420852  | 4.293246  | 2.305204  | H | -4.235497 | -1.655199 | 2.869044  |
| H | -0.033278 | 4.056677  | 1.321089  | C | -1.730763 | -0.775967 | 3.102406  |
| C | 1.299353  | 2.340667  | 1.436540  | H | -2.145772 | -1.222465 | 4.018096  |
| C | 0.808341  | 1.722695  | 2.717645  | H | -1.961020 | 0.298718  | 3.114249  |
| H | 1.010607  | 0.644072  | 2.743678  | H | -0.644733 | -0.926451 | 3.107445  |
| H | -0.272750 | 1.881237  | 2.832219  | C | 1.497561  | -3.067963 | -1.941990 |
| H | 1.314537  | 2.188791  | 3.575563  | C | 1.087496  | -4.348021 | -2.388794 |
| C | -1.200105 | 1.924007  | -0.231775 | H | 0.016141  | -4.519063 | -2.528075 |
| C | -1.619215 | 3.221154  | -0.587166 | C | 2.005073  | -5.359157 | -2.644979 |
| H | -0.868997 | 3.993967  | -0.744136 | H | 1.649821  | -6.337216 | -2.982721 |
| C | -2.959090 | 3.527027  | -0.799360 | C | 3.373346  | -5.133416 | -2.472782 |
| C | -2.489966 | 5.792342  | -1.252885 | H | 4.099470  | -5.925790 | -2.667678 |
| H | -1.994842 | 5.989802  | -0.287751 | C | 3.798640  | -3.873258 | -2.054095 |
| H | -3.055372 | 6.683761  | -1.544880 | H | 4.870036  | -3.679600 | -1.928796 |
| H | -1.719841 | 5.597596  | -2.017519 | C | 2.896801  | -2.838929 | -1.793101 |
| C | -3.933158 | 2.505206  | -0.661040 | C | 3.395127  | -1.473515 | -1.396515 |
| C | -6.202124 | 1.876729  | -0.763835 | H | 2.556067  | -0.756285 | -1.474712 |
| H | -6.047853 | 1.027335  | -1.449323 | H | 4.133462  | -1.126939 | -2.138829 |
| H | -7.155503 | 2.356418  | -1.009393 | C | 4.030407  | -1.384342 | -0.033487 |
| H | -6.254320 | 1.498276  | 0.270585  | C | 5.427787  | -1.323818 | 0.056497  |
| C | -3.525493 | 1.224579  | -0.304126 | H | 6.014808  | -1.314123 | -0.867434 |
| H | -4.266370 | 0.429319  | -0.253672 | C | 6.079942  | -1.274892 | 1.286748  |

|                          |           |           |           |   |           |           |           |
|--------------------------|-----------|-----------|-----------|---|-----------|-----------|-----------|
| H                        | 7.171058  | -1.220294 | 1.322611  | H | -0.626158 | 2.045273  | -2.810441 |
| C                        | 5.335844  | -1.290898 | 2.466543  | H | -2.132214 | 1.671616  | -3.685944 |
| H                        | 5.836814  | -1.250002 | 3.437057  | C | 0.028903  | 2.181869  | 0.230430  |
| C                        | 3.950084  | -1.365983 | 2.395702  | C | -0.219520 | 3.484166  | 0.708192  |
| H                        | 3.342657  | -1.391415 | 3.304139  | H | -1.242272 | 3.764471  | 0.957368  |
| C                        | 3.281475  | -1.409332 | 1.162216  | C | 0.805647  | 4.402085  | 0.906833  |
| C                        | 1.772061  | -1.457342 | 1.197780  | C | -0.661857 | 6.052996  | 1.733824  |
| O                        | 1.238847  | -1.853057 | 2.223273  | H | -1.322422 | 6.092271  | 0.852330  |
|                          |           |           |           | H | -0.575099 | 7.062559  | 2.149515  |
| <b><sup>36</sup>(L1)</b> |           |           |           | H | -1.116090 | 5.394581  | 2.492106  |
| P                        | -1.307898 | 0.961771  | -0.040150 | C | 2.139604  | 4.028332  | 0.598687  |
| P                        | 1.698261  | 0.026413  | -0.317491 | C | 4.420293  | 4.621726  | 0.552133  |
| O                        | -4.855000 | 2.170671  | -0.498082 | H | 4.755251  | 3.774759  | 1.173924  |
| O                        | -3.178077 | 2.714790  | 1.038956  | H | 5.024576  | 5.500357  | 0.801762  |
| O                        | -3.435502 | 0.702504  | -1.632459 | H | 4.582458  | 4.374056  | -0.510302 |
| O                        | 0.640753  | 5.644260  | 1.389094  | C | 2.394221  | 2.740408  | 0.145524  |
| O                        | 3.079329  | 4.965511  | 0.807925  | H | 3.426952  | 2.434024  | -0.006675 |
| O                        | 4.350419  | 0.409942  | 0.376406  | C | 1.363115  | 1.795736  | -0.032790 |
| O                        | 5.164976  | -1.248044 | -1.057814 | C | 4.887242  | 0.134061  | -0.914051 |
| O                        | 3.003246  | -1.706765 | -1.826915 | C | 6.195727  | 0.868450  | -0.996452 |
| C                        | -2.704524 | 1.364699  | 1.161674  | H | 6.855646  | 0.545476  | -0.182130 |
| C                        | -2.247844 | 1.178321  | 2.585127  | H | 6.037173  | 1.951076  | -0.911421 |
| H                        | -1.812461 | 0.176571  | 2.714264  | H | 6.691615  | 0.661371  | -1.952580 |
| H                        | -3.091931 | 1.303195  | 3.278765  | C | 4.010561  | -2.052320 | -0.869975 |
| H                        | -1.476348 | 1.915331  | 2.850791  | C | 4.396929  | -3.475182 | -1.153855 |
| C                        | -3.834465 | 0.424308  | 0.757030  | H | 3.539732  | -4.143526 | -1.008885 |
| H                        | -4.637352 | 0.489853  | 1.508412  | H | 5.204812  | -3.789061 | -0.482021 |
| H                        | -3.486291 | -0.616149 | 0.715808  | H | 4.744528  | -3.566795 | -2.189902 |
| C                        | -4.408864 | 0.824216  | -0.598604 | C | 3.510862  | -1.827418 | 0.552024  |
| C                        | -5.576540 | -0.018942 | -1.020375 | H | 2.629088  | -2.451388 | 0.759845  |
| H                        | -5.957672 | 0.331703  | -1.987241 | H | 4.305470  | -2.130868 | 1.252586  |
| H                        | -6.382340 | 0.044633  | -0.279307 | C | 3.199306  | -0.354433 | 0.771303  |
| H                        | -5.264550 | -1.065972 | -1.122228 | C | 2.903060  | -0.011775 | 2.208623  |
| C                        | -3.796731 | 3.060771  | -0.199246 | H | 1.952149  | -0.473014 | 2.514659  |
| C                        | -4.397994 | 4.424094  | -0.003648 | H | 2.815425  | 1.074973  | 2.344616  |
| H                        | -4.915544 | 4.748363  | -0.914607 | H | 3.710093  | -0.370779 | 2.864188  |
| H                        | -3.620197 | 5.158395  | 0.240359  | C | 2.644870  | -0.319825 | -1.921387 |
| H                        | -5.123009 | 4.392828  | 0.818789  | C | 3.905021  | 0.519051  | -2.018973 |
| C                        | -2.793753 | 2.992994  | -1.348164 | H | 3.664375  | 1.592228  | -1.986728 |
| H                        | -3.310853 | 3.309563  | -2.268468 | H | 4.392737  | 0.323354  | -2.987921 |
| H                        | -1.958130 | 3.689557  | -1.190060 | C | 1.752868  | -0.200225 | -3.128046 |
| C                        | -2.303188 | 1.566213  | -1.545372 | H | 2.296959  | -0.503644 | -4.034333 |
| C                        | -1.515327 | 1.398079  | -2.817273 | H | 1.406690  | 0.833651  | -3.262068 |
| H                        | -1.195112 | 0.355272  | -2.946790 | H | 0.874758  | -0.856416 | -3.029026 |

|                           |           |           |           |   |           |           |           |
|---------------------------|-----------|-----------|-----------|---|-----------|-----------|-----------|
| Ni                        | -0.303847 | -1.316074 | -0.131955 | C | -4.036938 | -0.357738 | 0.384312  |
| O                         | -0.213759 | -1.519776 | 1.862664  | H | -4.879088 | -0.419402 | 1.091862  |
| C                         | -0.167862 | -2.785005 | 2.213475  | H | -3.575910 | -1.350207 | 0.319236  |
| C                         | 1.014606  | -3.361226 | 2.743251  | C | -4.581924 | 0.061997  | -0.972429 |
| H                         | 1.871102  | -2.705142 | 2.921682  | C | -5.602161 | -0.883548 | -1.535513 |
| C                         | 1.098150  | -4.719371 | 3.030186  | H | -5.971539 | -0.502060 | -2.495294 |
| H                         | 2.029917  | -5.131539 | 3.429484  | H | -6.449306 | -0.983962 | -0.846370 |
| C                         | 0.002394  | -5.555829 | 2.808173  | H | -5.154954 | -1.872569 | -1.690894 |
| H                         | 0.065924  | -6.625612 | 3.020846  | C | -4.309364 | 2.323848  | -0.390672 |
| C                         | -1.186749 | -4.999786 | 2.332803  | C | -5.101899 | 3.573184  | -0.125715 |
| H                         | -2.062080 | -5.641710 | 2.182804  | H | -5.635817 | 3.885974  | -1.031073 |
| C                         | -1.302125 | -3.638145 | 2.051776  | H | -4.441056 | 4.389835  | 0.192265  |
| C                         | -2.600966 | -3.042608 | 1.588811  | H | -5.836513 | 3.386334  | 0.666962  |
| H                         | -2.636687 | -2.005277 | 1.963925  | C | -3.256425 | 2.489905  | -1.480547 |
| H                         | -3.435954 | -3.579584 | 2.064882  | H | -3.773571 | 2.806663  | -2.400745 |
| C                         | -2.813344 | -3.036248 | 0.090975  | H | -2.534433 | 3.279377  | -1.226244 |
| C                         | -3.905856 | -3.734052 | -0.445897 | C | -2.553767 | 1.169618  | -1.753341 |
| H                         | -4.579248 | -4.272132 | 0.231123  | C | -1.745958 | 1.208210  | -3.021260 |
| C                         | -4.145755 | -3.759990 | -1.819548 | H | -1.262107 | 0.240565  | -3.214345 |
| H                         | -5.000977 | -4.313274 | -2.217624 | H | -0.978173 | 1.991263  | -2.977606 |
| C                         | -3.280531 | -3.083203 | -2.675924 | H | -2.408266 | 1.425308  | -3.871930 |
| H                         | -3.447212 | -3.097693 | -3.757160 | C | -0.457889 | 2.020503  | 0.342123  |
| C                         | -2.189820 | -2.392760 | -2.142023 | C | -1.010980 | 3.186751  | 0.912735  |
| H                         | -1.514816 | -1.886813 | -2.846543 | H | -2.092351 | 3.284804  | 0.957715  |
| C                         | -1.934288 | -2.337021 | -0.763710 | C | -0.228106 | 4.183225  | 1.481321  |
| C                         | 0.588963  | -3.067455 | -0.566196 | C | -2.102681 | 5.499967  | 2.040528  |
| O                         | 0.700018  | -4.070118 | -1.111172 | H | -2.496474 | 5.561247  | 1.012153  |
|                           |           |           |           | H | -2.288302 | 6.455439  | 2.543079  |
|                           |           |           |           | H | -2.640119 | 4.705192  | 2.583845  |
| <b><sup>3</sup>10(L1)</b> |           |           |           | C | 1.181171  | 4.033155  | 1.494096  |
| P                         | -1.515585 | 0.627749  | -0.236020 | C | 3.283707  | 4.913548  | 2.091927  |
| P                         | 1.705810  | 0.363684  | -0.336817 | H | 3.627774  | 4.004814  | 2.612561  |
| O                         | -5.213388 | 1.326489  | -0.820401 | H | 3.660544  | 5.790708  | 2.628417  |
| O                         | -3.709714 | 1.960264  | 0.851553  | H | 3.698969  | 4.919770  | 1.070960  |
| O                         | -3.530061 | 0.143763  | -1.936506 | C | 1.739075  | 2.897419  | 0.921567  |
| O                         | -0.709588 | 5.302544  | 2.049321  | H | 2.819046  | 2.763122  | 0.951589  |
| O                         | 1.879592  | 5.020198  | 2.078354  | C | 0.951640  | 1.883357  | 0.339396  |
| O                         | 4.223654  | 1.142603  | 0.587821  | C | 4.766959  | 1.458861  | -0.691566 |
| O                         | 5.369545  | 0.323226  | -1.284174 | C | 5.852294  | 2.469664  | -0.449518 |
| O                         | 3.368425  | -0.352045 | -2.295103 | H | 6.607743  | 2.044955  | 0.222714  |
| C                         | -3.055159 | 0.682069  | 0.903549  | H | 5.440205  | 3.374926  | 0.014299  |
| C                         | -2.675233 | 0.452304  | 2.343565  | H | 6.337896  | 2.746023  | -1.393249 |
| H                         | -2.231963 | -0.544879 | 2.467404  | C | 4.450592  | -0.749036 | -1.446324 |
| H                         | -3.571245 | 0.507217  | 2.978351  | C | 5.163245  | -1.855524 | -2.168707 |
| H                         | -1.956169 | 1.200132  | 2.706644  |   |           |           |           |

|    |           |           |           |                           |           |           |           |
|----|-----------|-----------|-----------|---------------------------|-----------|-----------|-----------|
| H  | 4.484939  | -2.703708 | -2.323081 | C                         | 0.095549  | -1.854587 | -2.258405 |
| H  | 6.029573  | -2.194916 | -1.588454 | O                         | 0.230960  | -2.428562 | -3.240386 |
| H  | 5.511159  | -1.499623 | -3.146268 |                           |           |           |           |
| C  | 3.946192  | -1.150293 | -0.069120 | <b><sup>3</sup>12(L1)</b> |           |           |           |
| H  | 3.219532  | -1.970666 | -0.143375 | P                         | 1.486657  | -0.407472 | -0.113391 |
| H  | 4.805341  | -1.490244 | 0.531123  | P                         | -1.536676 | -0.534616 | -0.126650 |
| C  | 3.302870  | 0.038739  | 0.633605  | O                         | 5.247760  | -0.606891 | 0.151381  |
| C  | 3.009198  | -0.223236 | 2.088426  | O                         | 3.802291  | 0.906281  | -0.893505 |
| H  | 2.332664  | -1.083036 | 2.188167  | O                         | 3.440946  | -1.826388 | 1.001919  |
| H  | 2.543036  | 0.648575  | 2.570212  | O                         | 1.052301  | 4.859779  | 0.071807  |
| H  | 3.941325  | -0.449425 | 2.626371  | O                         | -1.548676 | 4.749066  | 0.078747  |
| C  | 2.670025  | 0.835576  | -1.912958 | O                         | -3.961620 | 0.596980  | -0.879209 |
| C  | 3.676408  | 1.942880  | -1.639408 | O                         | -5.275021 | -1.033394 | 0.158596  |
| H  | 3.179499  | 2.843457  | -1.250601 | O                         | -3.374080 | -2.118710 | 0.985060  |
| H  | 4.153789  | 2.221047  | -2.593144 | C                         | 2.904490  | -0.120807 | -1.342873 |
| C  | 1.752603  | 1.194627  | -3.049488 | C                         | 2.373981  | 0.313218  | -2.684622 |
| H  | 2.337344  | 1.356959  | -3.966839 | H                         | 1.661721  | -0.432328 | -3.067206 |
| H  | 1.207700  | 2.121732  | -2.822931 | H                         | 3.195660  | 0.418242  | -3.408116 |
| H  | 1.025404  | 0.398597  | -3.252261 | H                         | 1.852894  | 1.278951  | -2.616521 |
| Ni | -0.104093 | -1.430331 | -0.447772 | C                         | 3.653227  | -1.446037 | -1.398416 |
| O  | 1.294843  | -2.595669 | 0.363334  | H                         | 4.409455  | -1.405541 | -2.198624 |
| C  | -1.632025 | -2.743765 | -0.207245 | H                         | 2.956460  | -2.267752 | -1.628361 |
| C  | -2.525322 | -3.154074 | -1.206092 | C                         | 4.365904  | -1.701300 | -0.073762 |
| H  | -2.404294 | -2.792437 | -2.235755 | C                         | 5.188658  | -2.957867 | -0.069909 |
| C  | -3.609799 | -3.992374 | -0.932156 | H                         | 5.698812  | -3.064429 | 0.895077  |
| H  | -4.286464 | -4.296211 | -1.737226 | H                         | 5.942872  | -2.925971 | -0.865444 |
| C  | -3.833203 | -4.430525 | 0.372251  | H                         | 4.542383  | -3.830319 | -0.223536 |
| H  | -4.687141 | -5.073256 | 0.603158  | C                         | 4.554749  | 0.621275  | 0.283455  |
| C  | -2.950411 | -4.049025 | 1.381499  | C                         | 5.585339  | 1.709575  | 0.400588  |
| H  | -3.110400 | -4.403760 | 2.406394  | H                         | 6.225872  | 1.536488  | 1.273604  |
| C  | -1.849545 | -3.227142 | 1.100203  | H                         | 5.101431  | 2.688832  | 0.507826  |
| C  | -0.850405 | -2.917311 | 2.191536  | H                         | 6.213279  | 1.725368  | -0.498560 |
| H  | -0.476845 | -1.880518 | 2.060633  | C                         | 3.644922  | 0.512564  | 1.502925  |
| H  | -1.326941 | -2.967627 | 3.182999  | H                         | 4.280247  | 0.333343  | 2.386149  |
| C  | 0.308430  | -3.866811 | 2.127322  | H                         | 3.100461  | 1.451580  | 1.678096  |
| C  | 0.408321  | -4.965705 | 2.979829  | C                         | 2.686637  | -0.654315 | 1.344118  |
| H  | -0.355882 | -5.102733 | 3.752855  | C                         | 1.932101  | -0.982359 | 2.604177  |
| C  | 1.448752  | -5.889338 | 2.865222  | H                         | 1.268548  | -1.843115 | 2.436977  |
| H  | 1.505789  | -6.743674 | 3.543837  | H                         | 1.319389  | -0.126855 | 2.923565  |
| C  | 2.409433  | -5.708503 | 1.866148  | H                         | 2.631795  | -1.230118 | 3.415820  |
| H  | 3.225570  | -6.428892 | 1.757058  | C                         | 0.611049  | 1.187042  | 0.022959  |
| C  | 2.336464  | -4.619212 | 1.007263  | C                         | 1.245377  | 2.441016  | 0.033466  |
| H  | 3.085924  | -4.475326 | 0.223607  | H                         | 2.330621  | 2.489591  | -0.034944 |
| C  | 1.294873  | -3.663259 | 1.115522  | C                         | 0.509969  | 3.626830  | 0.062325  |

|    |           |           |           |
|----|-----------|-----------|-----------|
| C  | 2.454560  | 4.960300  | 0.079408  |
| H  | 2.894243  | 4.498601  | 0.979562  |
| H  | 2.694210  | 6.029222  | 0.084573  |
| H  | 2.910297  | 4.503150  | -0.814693 |
| C  | -0.903705 | 3.566681  | 0.064108  |
| C  | -2.954466 | 4.731437  | 0.096480  |
| H  | -3.376310 | 4.241150  | -0.796674 |
| H  | -3.282751 | 5.776486  | 0.108308  |
| H  | -3.346515 | 4.230308  | 0.997547  |
| C  | -1.535964 | 2.322814  | 0.031986  |
| H  | -2.621296 | 2.278333  | -0.038032 |
| C  | -0.797694 | 1.127381  | 0.019024  |
| C  | -4.678375 | 0.244412  | 0.300512  |
| C  | -5.788913 | 1.248705  | 0.435096  |
| H  | -6.424471 | 1.222333  | -0.458362 |
| H  | -5.379491 | 2.261259  | 0.543974  |
| H  | -6.406496 | 1.022733  | 1.312588  |
| C  | -4.312203 | -2.052407 | -0.082786 |
| C  | -5.040916 | -3.366330 | -0.091350 |
| H  | -4.339892 | -4.190397 | -0.271188 |
| H  | -5.807053 | -3.373765 | -0.875860 |
| H  | -5.529055 | -3.525400 | 0.877774  |
| C  | -3.623809 | -1.729728 | -1.405835 |
| H  | -2.861133 | -2.491209 | -1.636897 |
| H  | -4.378634 | -1.747808 | -2.208292 |
| C  | -2.983849 | -0.348015 | -1.340941 |
| C  | -2.500768 | 0.137940  | -2.682919 |
| H  | -1.718502 | -0.532995 | -3.067006 |
| H  | -2.076790 | 1.149836  | -2.613317 |
| H  | -3.329170 | 0.162816  | -3.406114 |
| C  | -2.710217 | -0.893232 | 1.336288  |
| C  | -3.755352 | 0.192398  | 1.514574  |
| H  | -3.284220 | 1.168909  | 1.698522  |
| H  | -4.370673 | -0.045186 | 2.398346  |
| C  | -1.920829 | -1.180354 | 2.584048  |
| H  | -2.588728 | -1.499435 | 3.397567  |
| H  | -1.374691 | -0.284968 | 2.914039  |
| H  | -1.191627 | -1.981117 | 2.391441  |
| Ni | 0.039266  | -1.993695 | -0.474617 |
| C  | 0.917536  | -3.516347 | -0.129903 |
| O  | 1.538484  | -4.486845 | 0.065576  |
